# Supplementary material for: 25pTH-13 コロイド結晶の結晶構造の経時変化(25pTH 結晶成長,領域9(表面・界面,結晶成長))
Source: Royal Society of Chemistry journal article supplement (doi:10.1039/d2md00334a), 2011-03-03
Supplement: d2md00334a1.pdf [file d2md00334a1.pdf]

## Supporting information

### Design, synthesis and biological evaluation of pyrazolo[3,4-b]pyridine derivatives as TRKs inhibitors

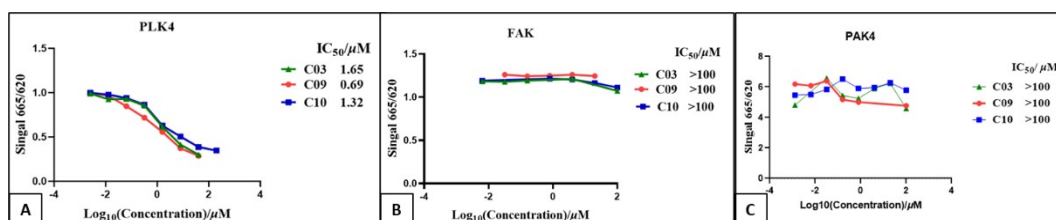

**Figure S1** Inhibitor activities of C03, C09 and C10 on various kinases: PLK4(A), FAK(B), PAK4(C).

<sup>1</sup>H-NMR spectra of compound referred in the article and the structure of compound is noted in the spectrum.

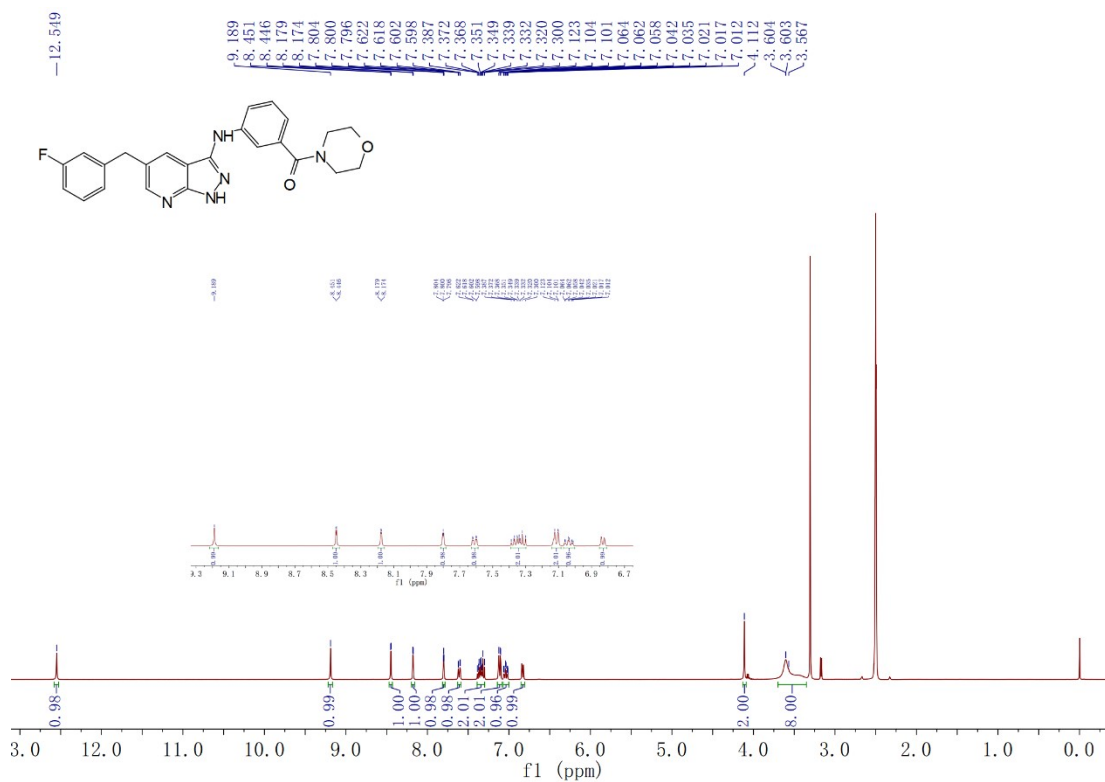



-12.580

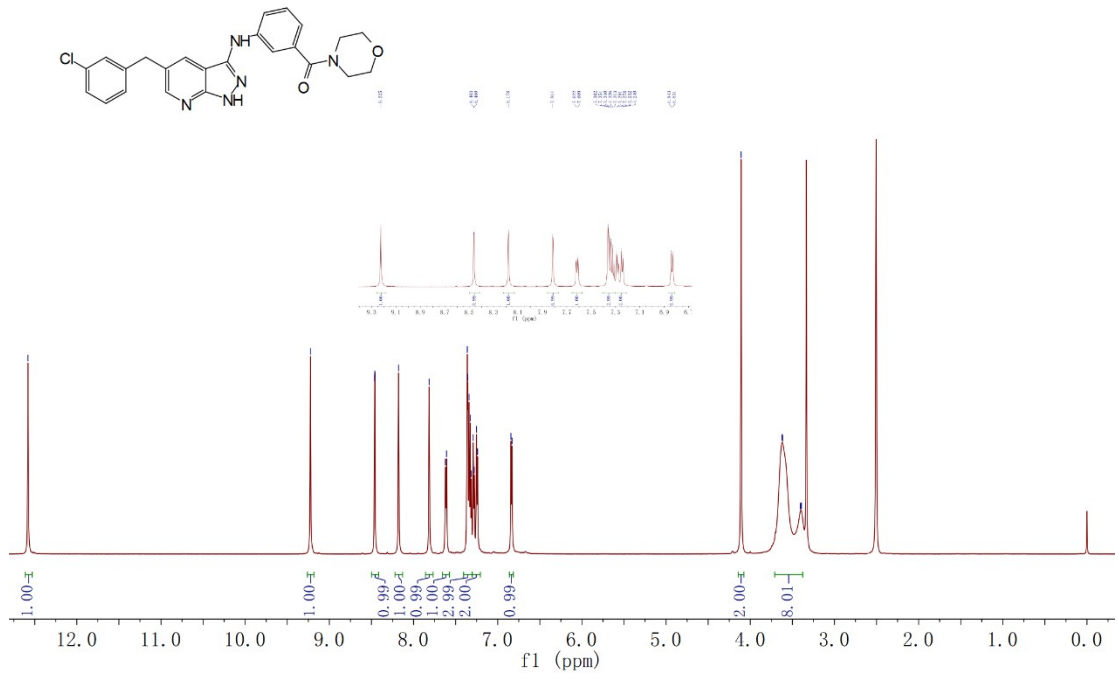

-12.599

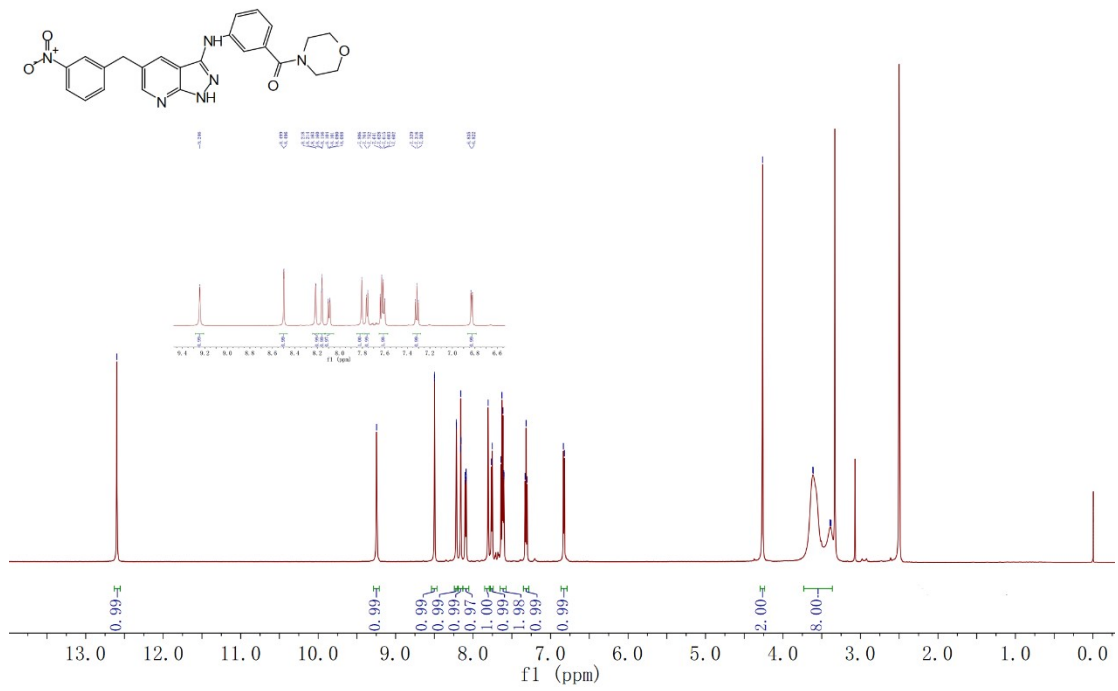

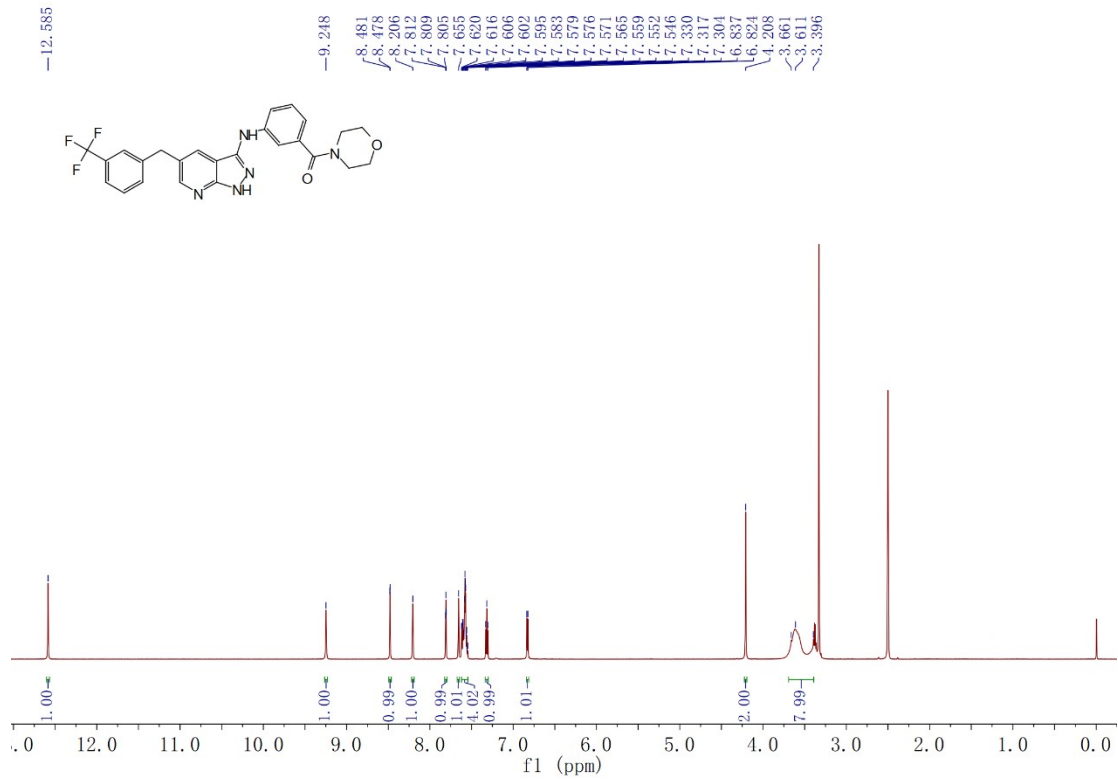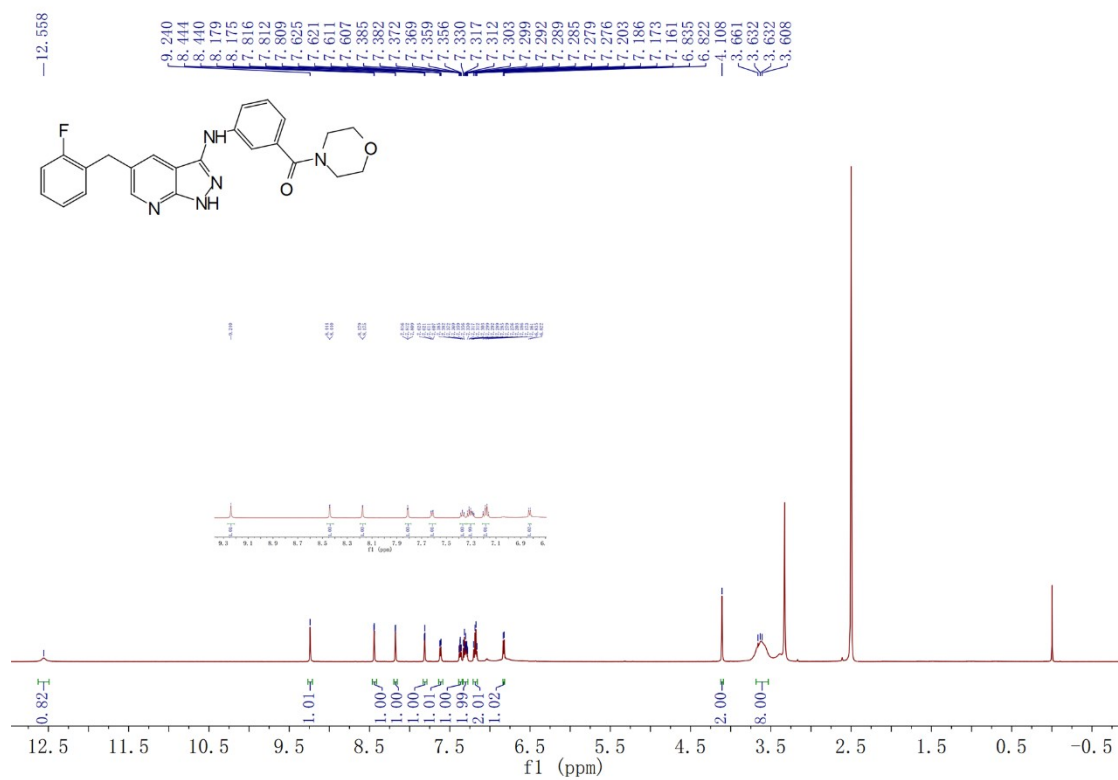



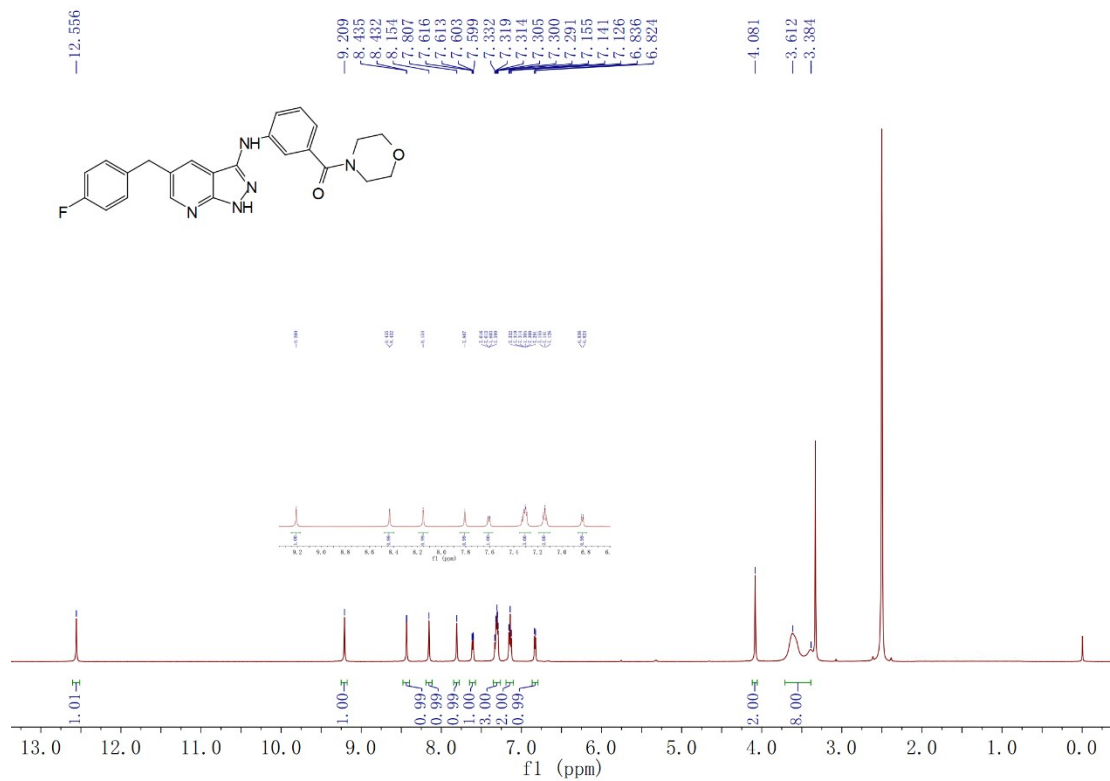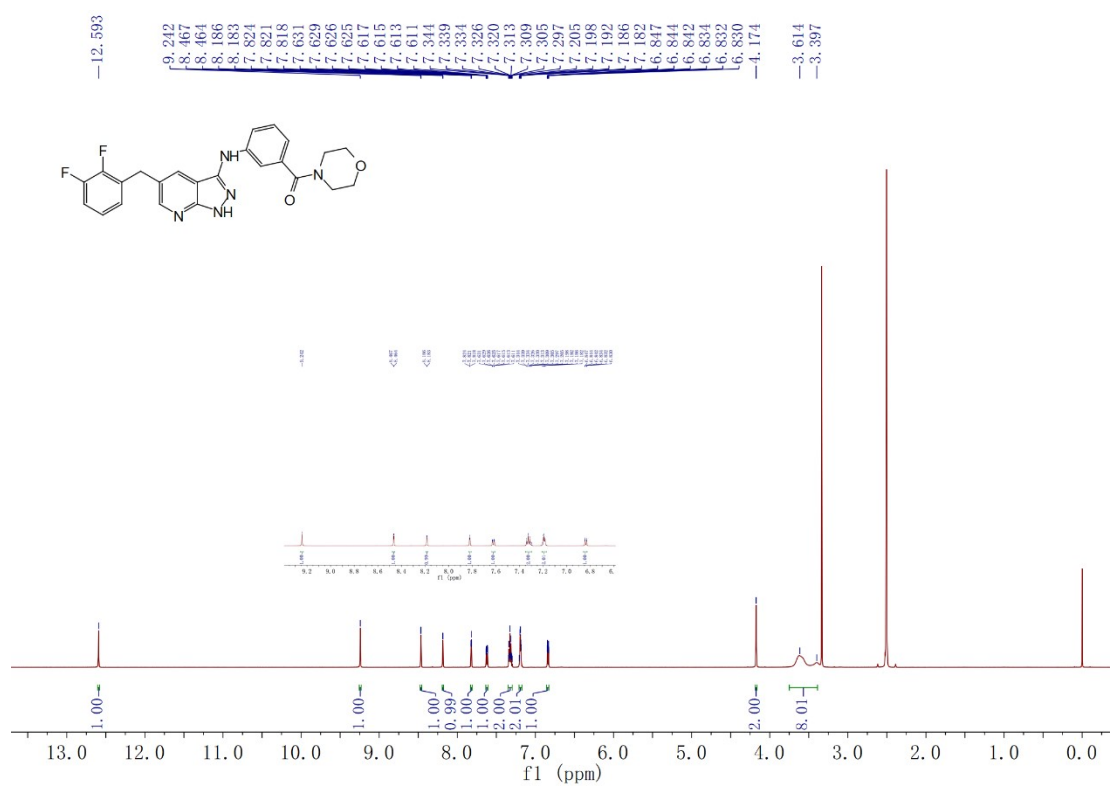

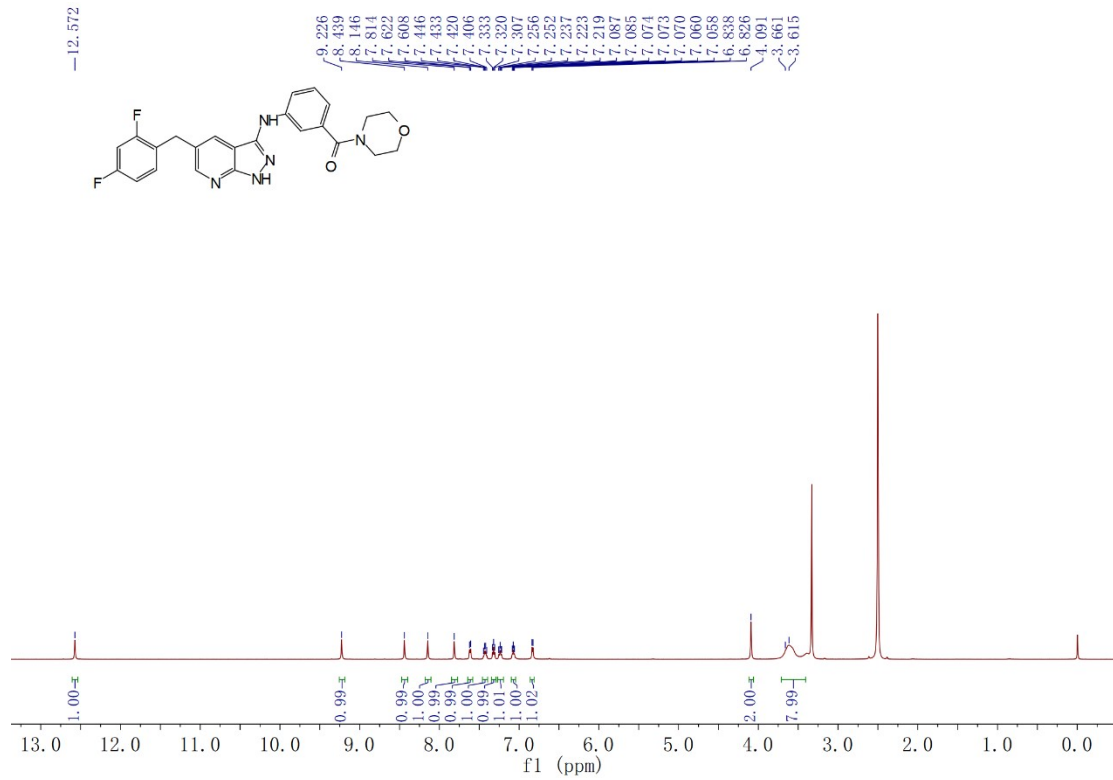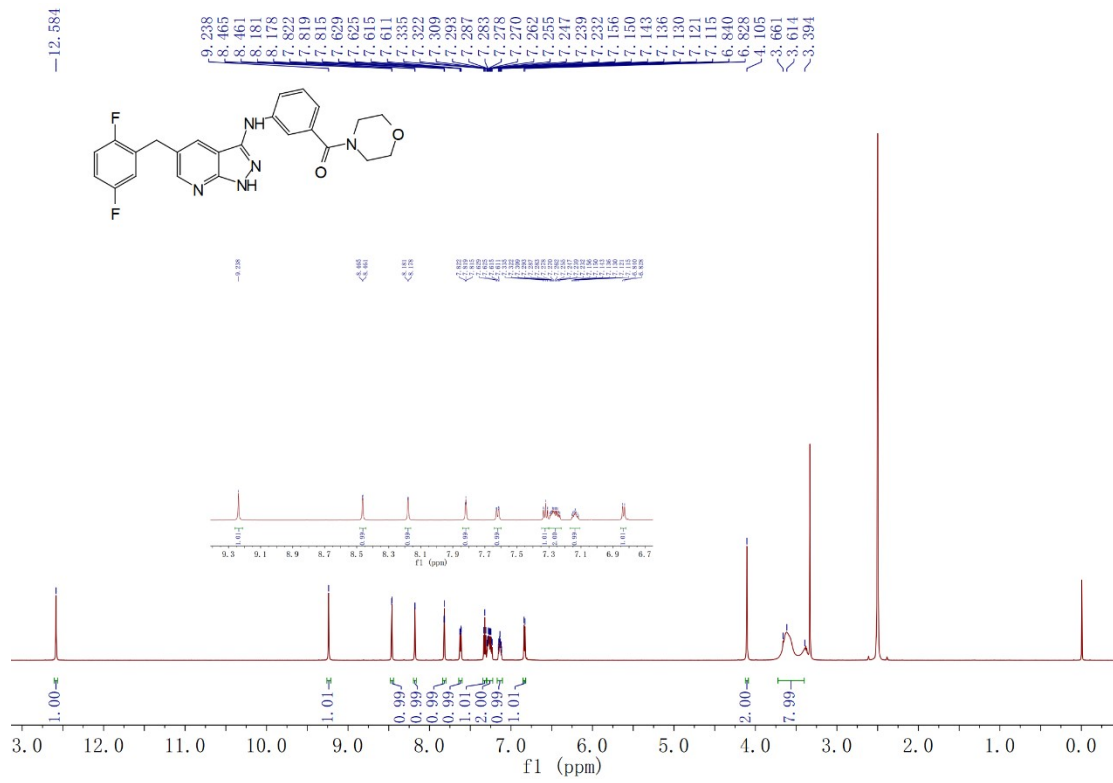

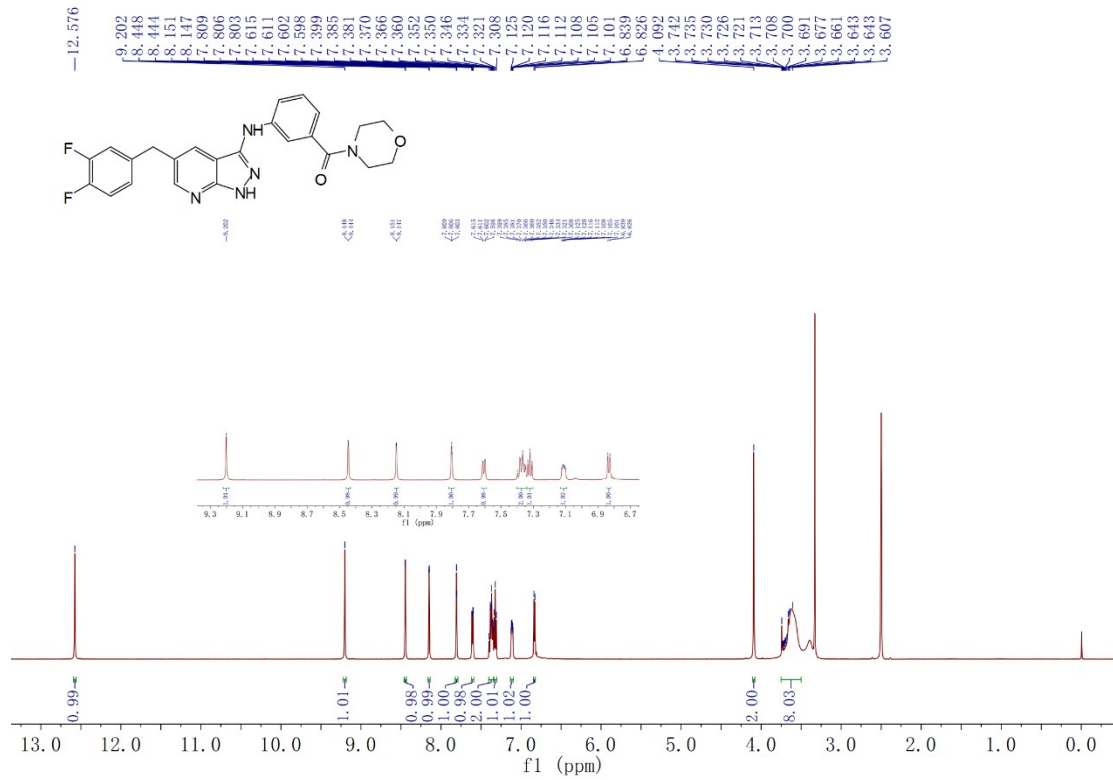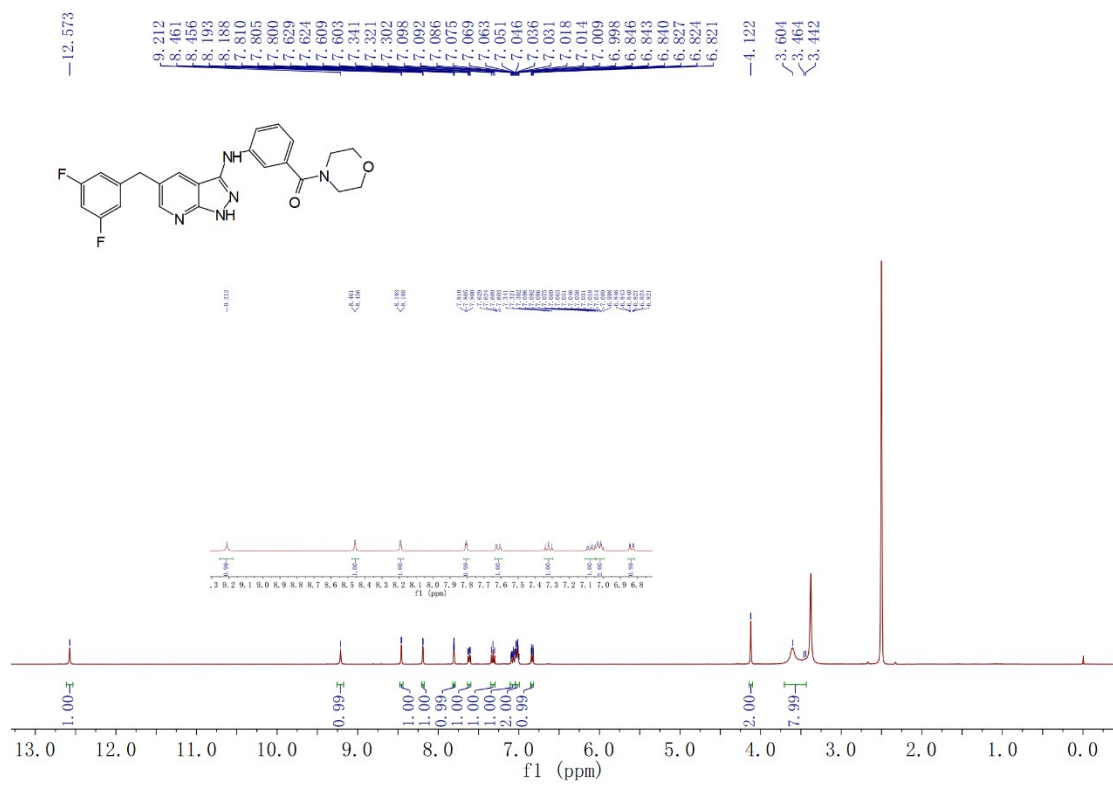

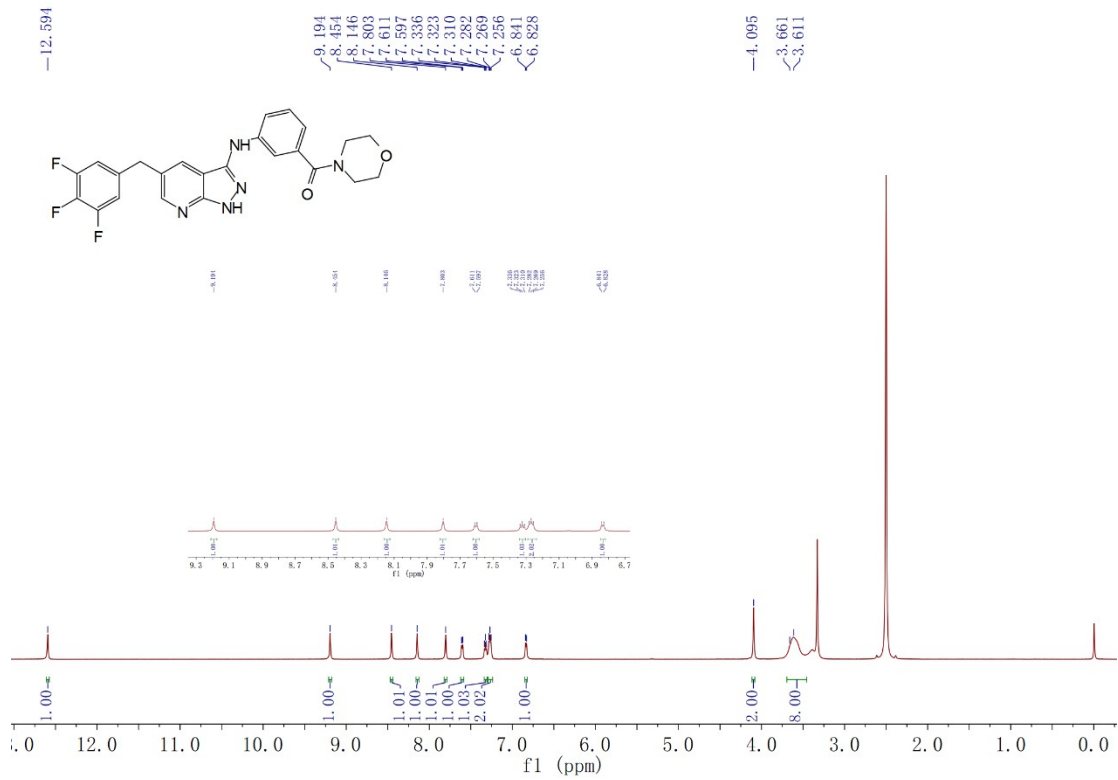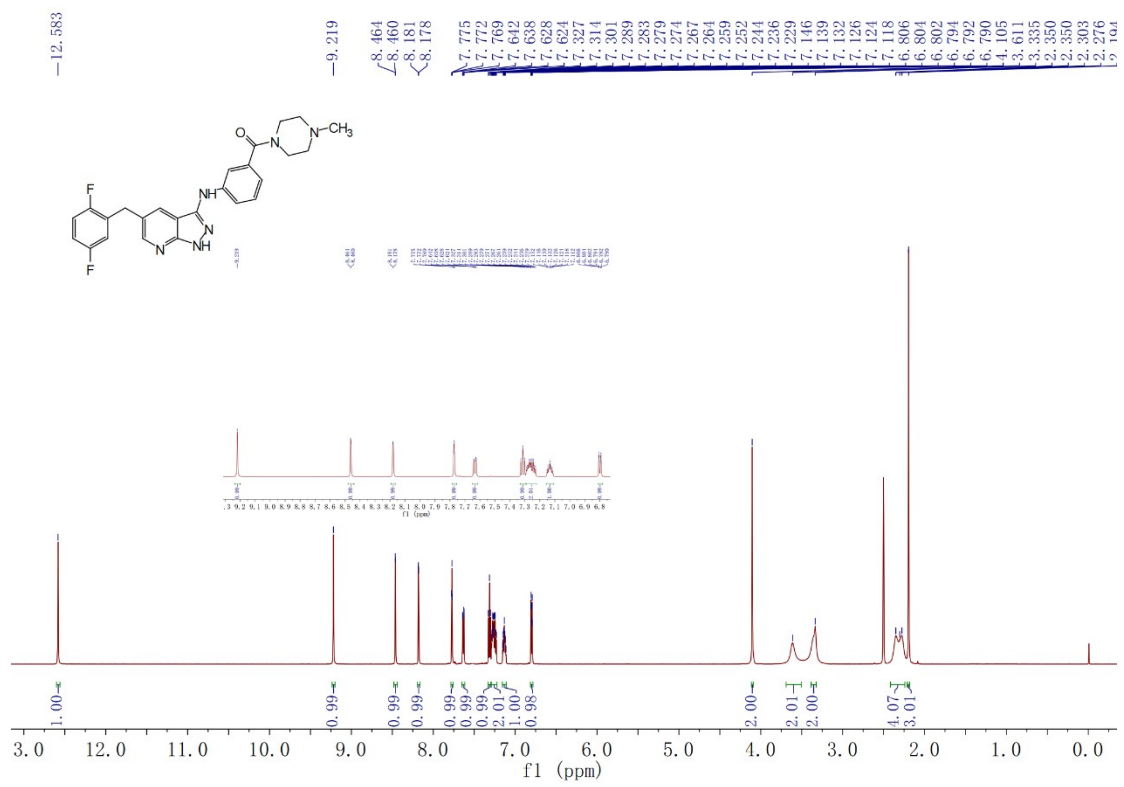

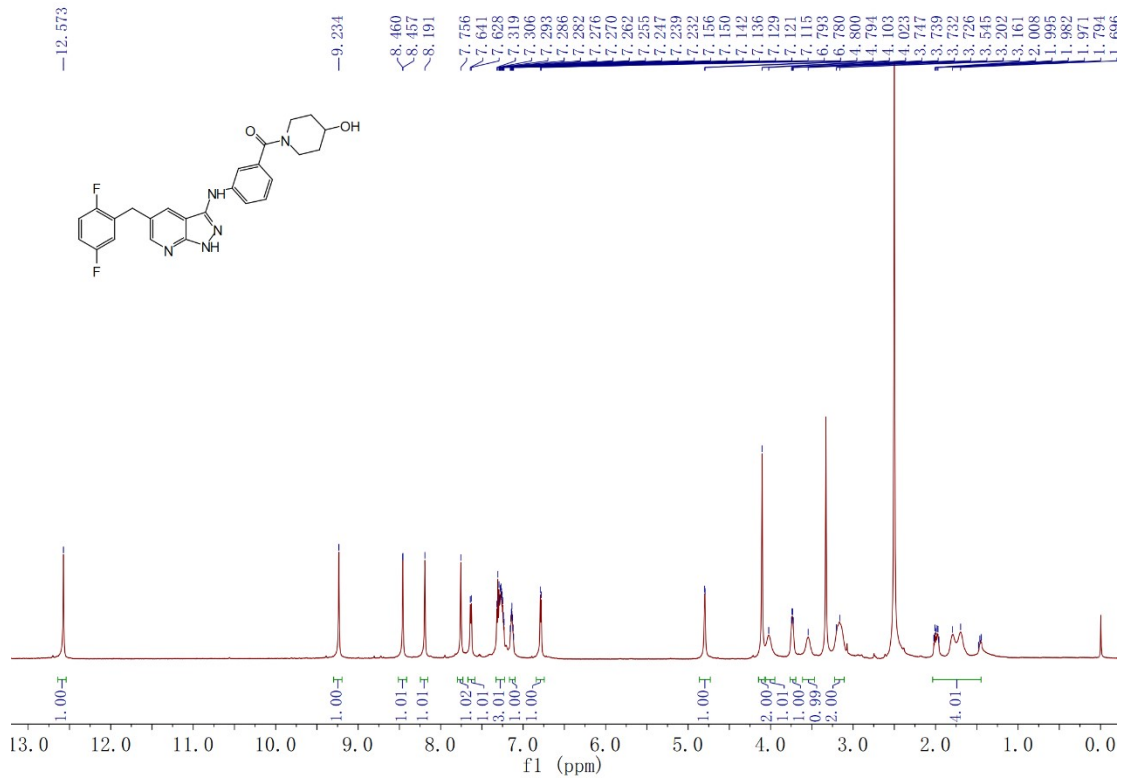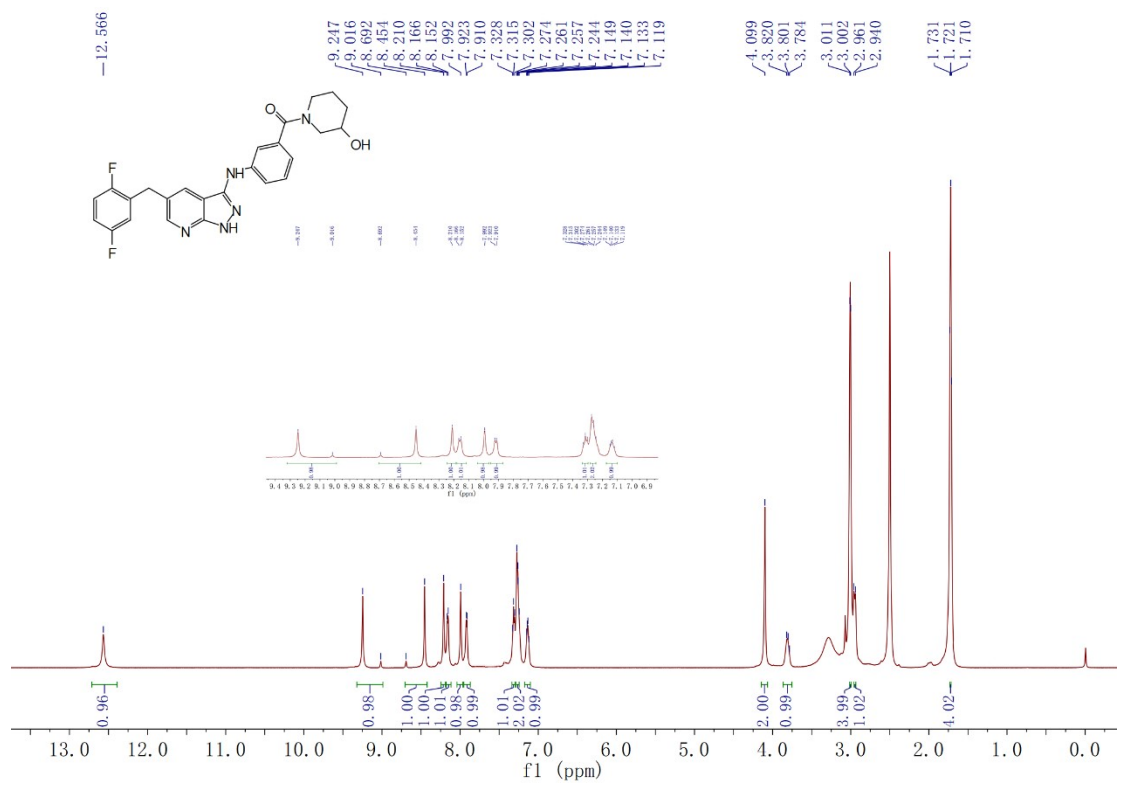

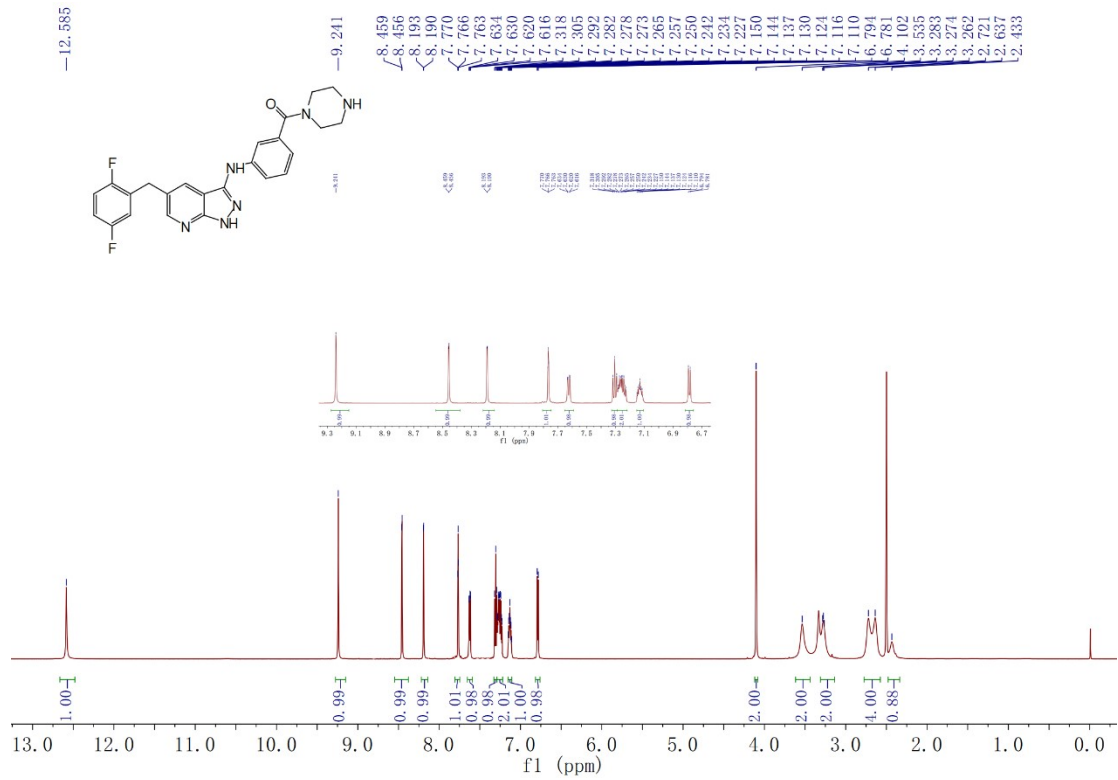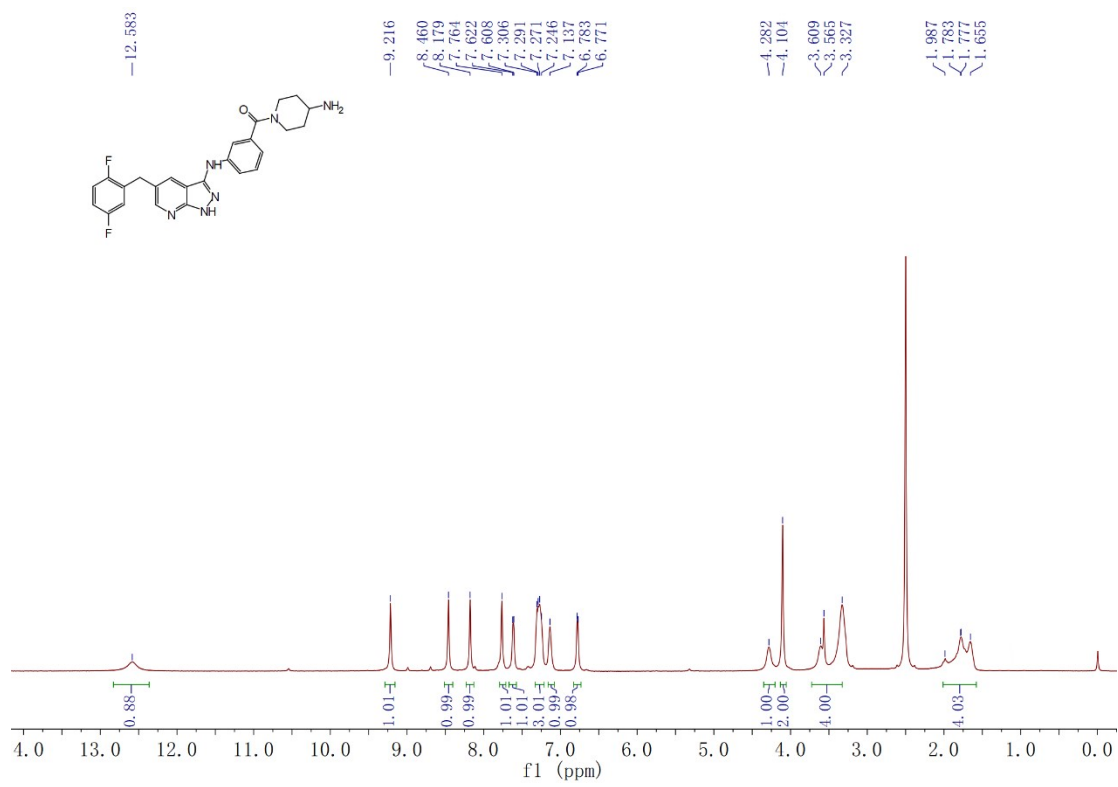

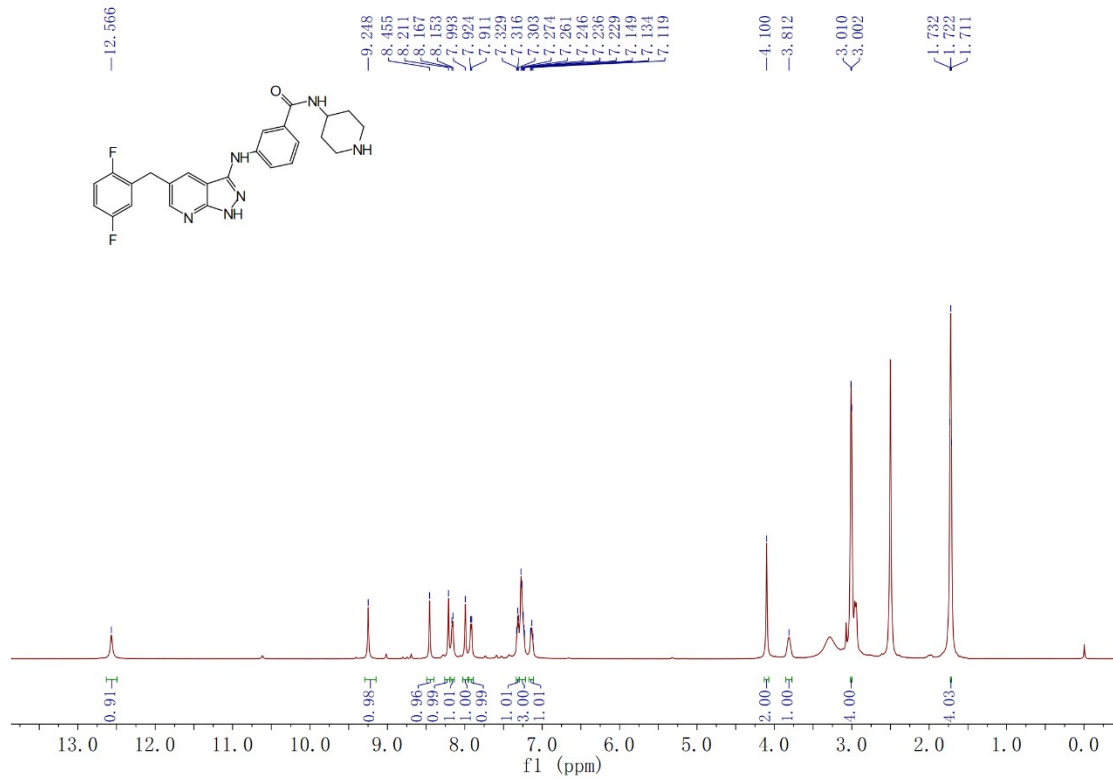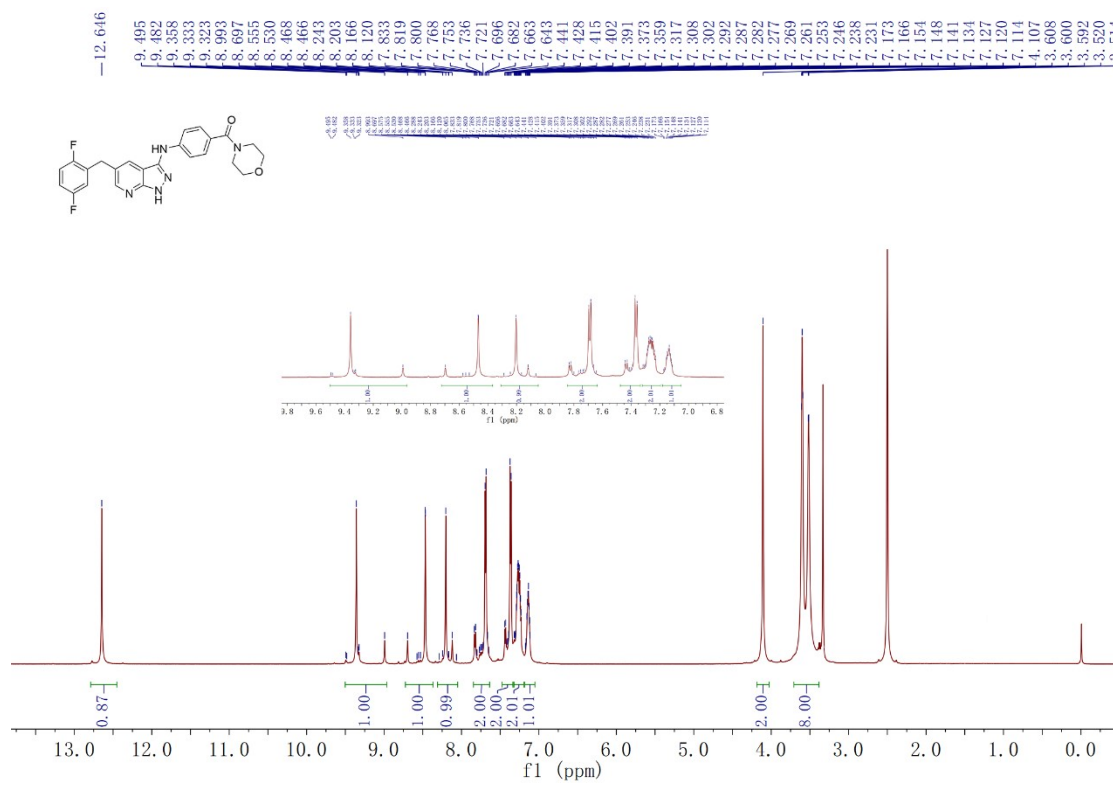

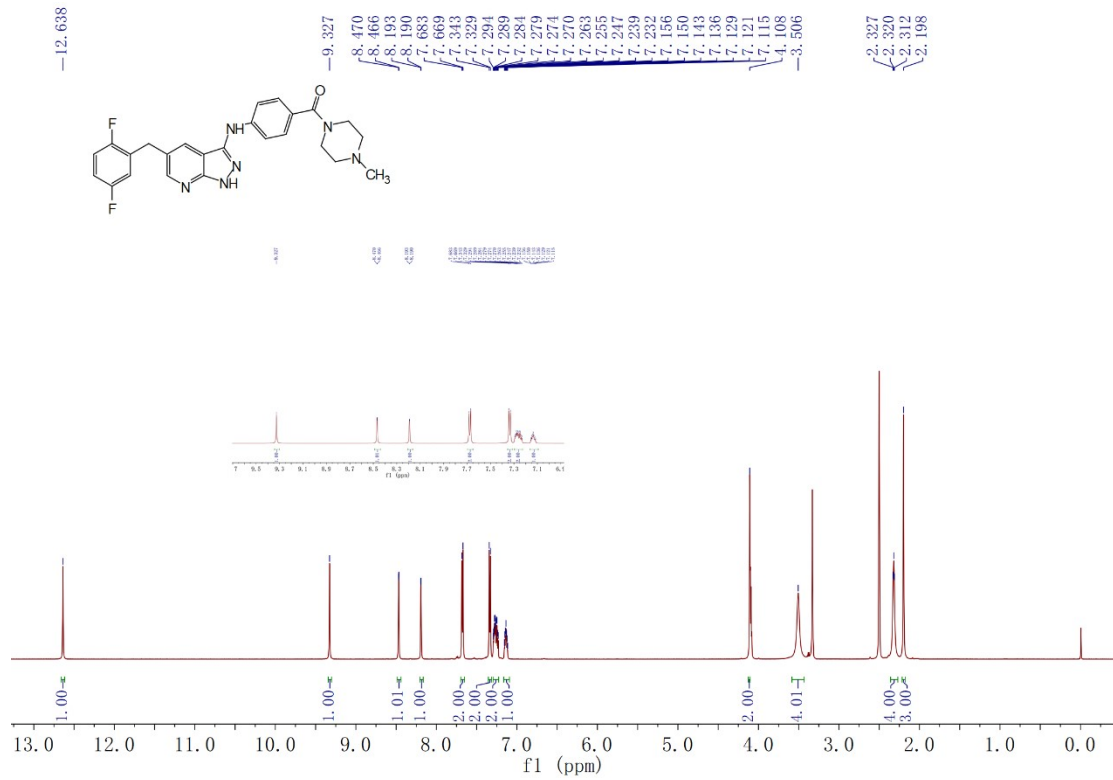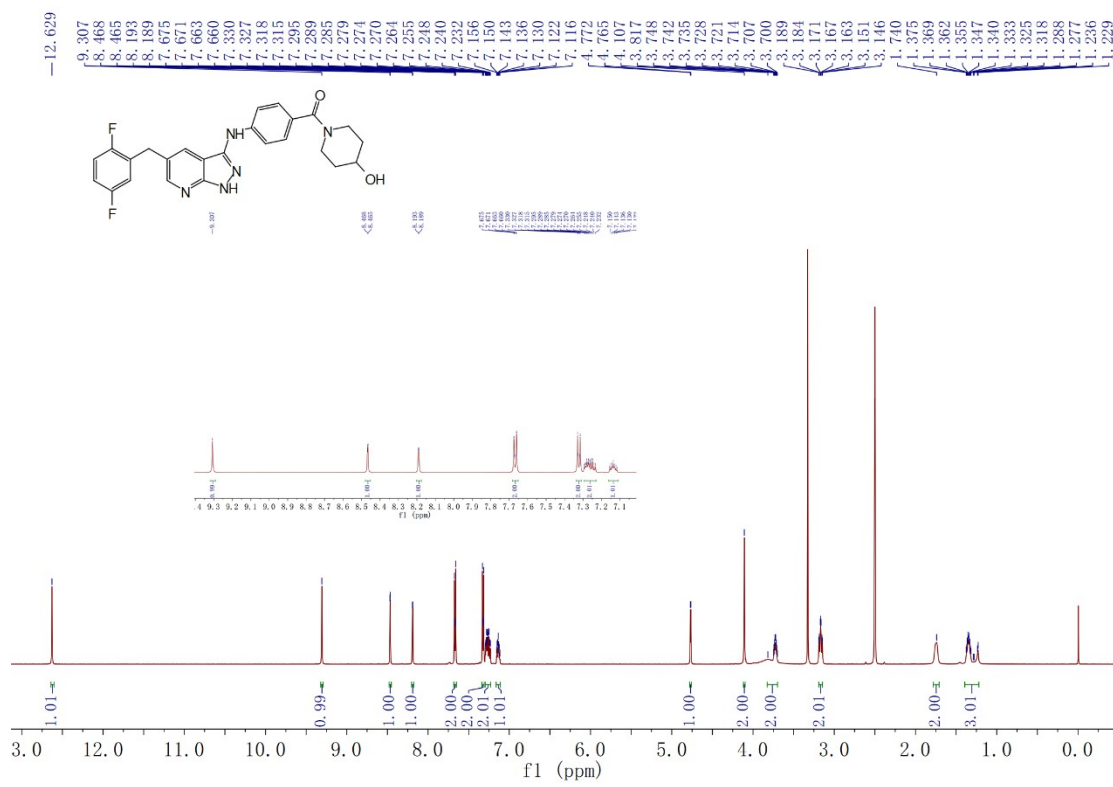



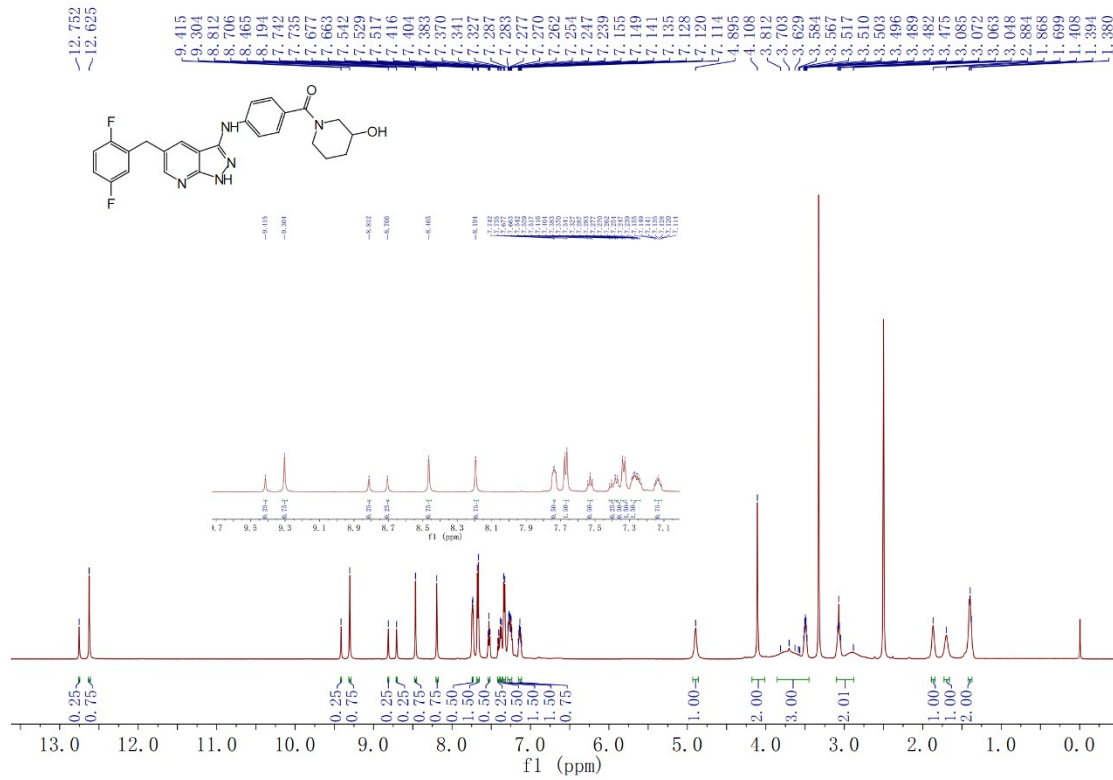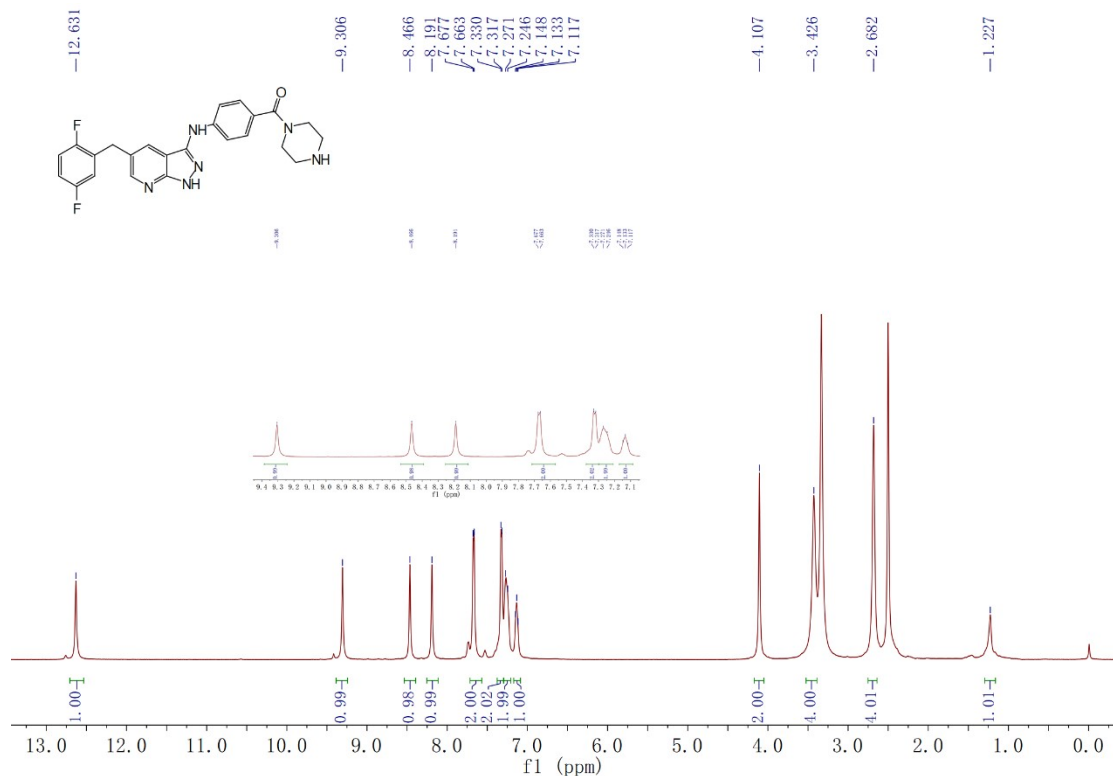

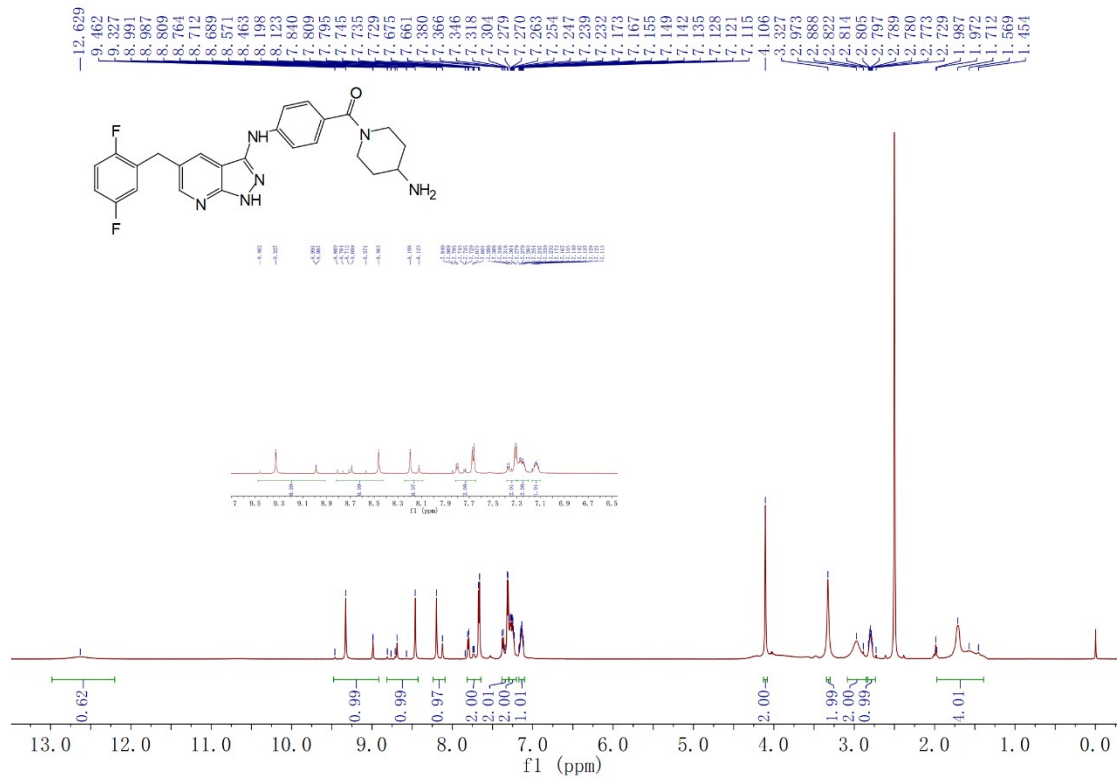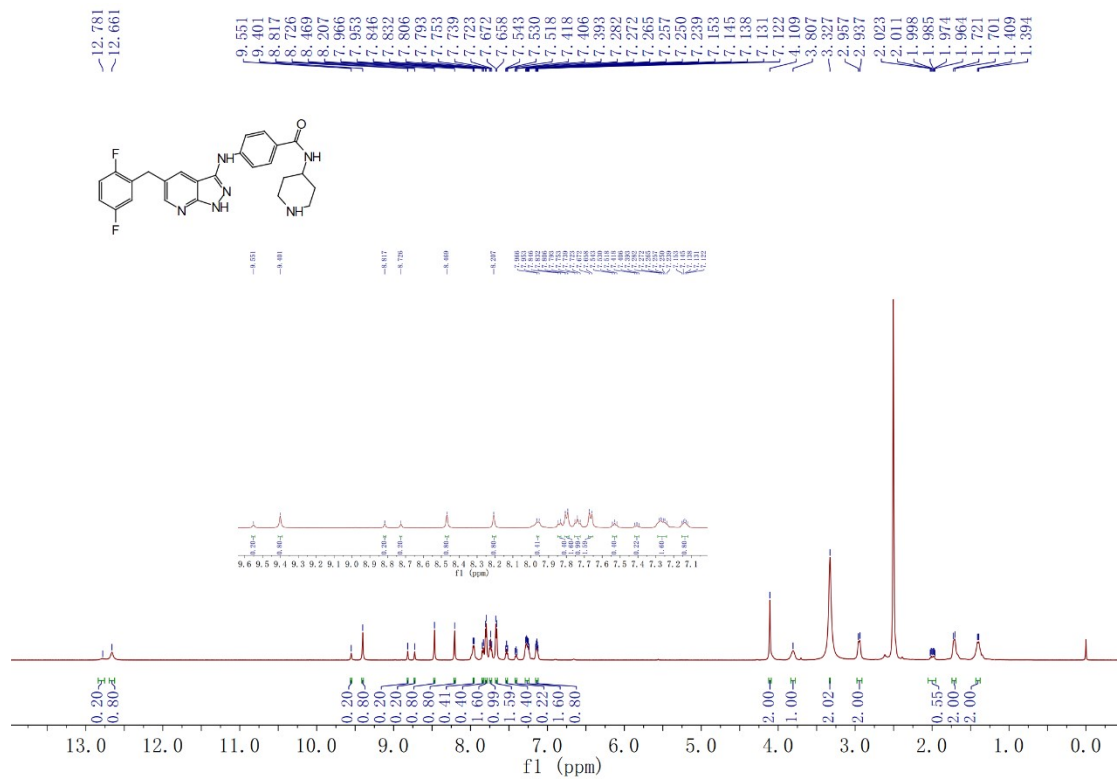

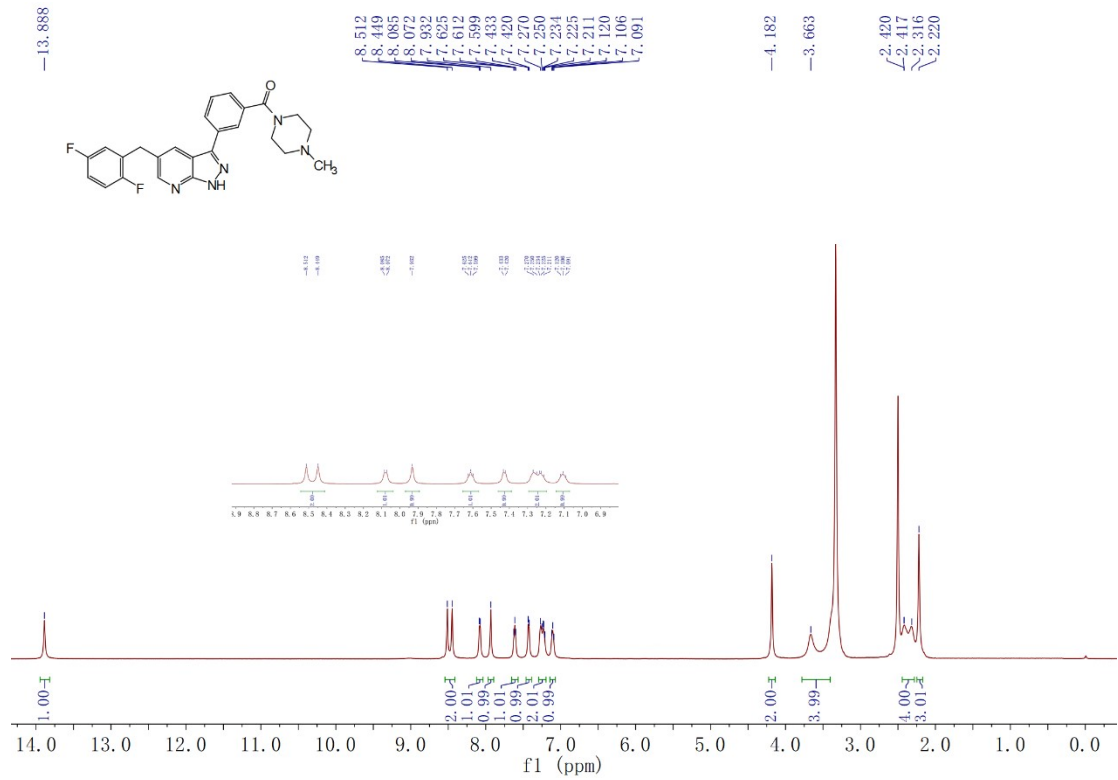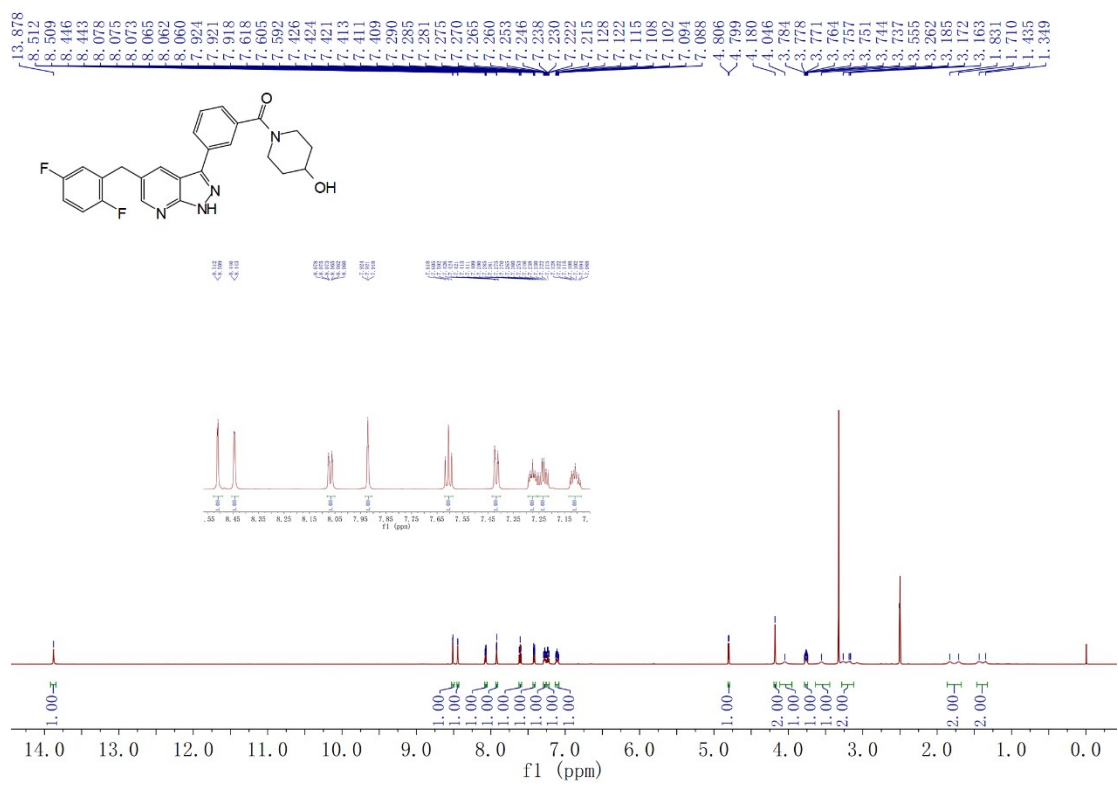

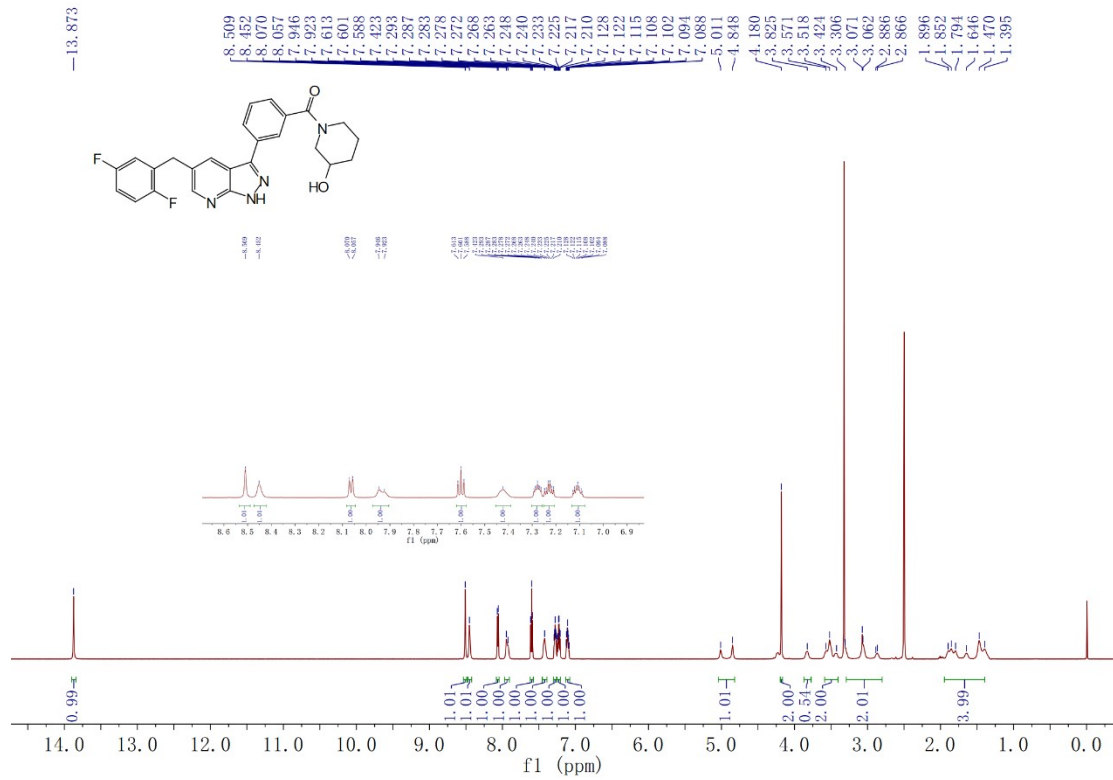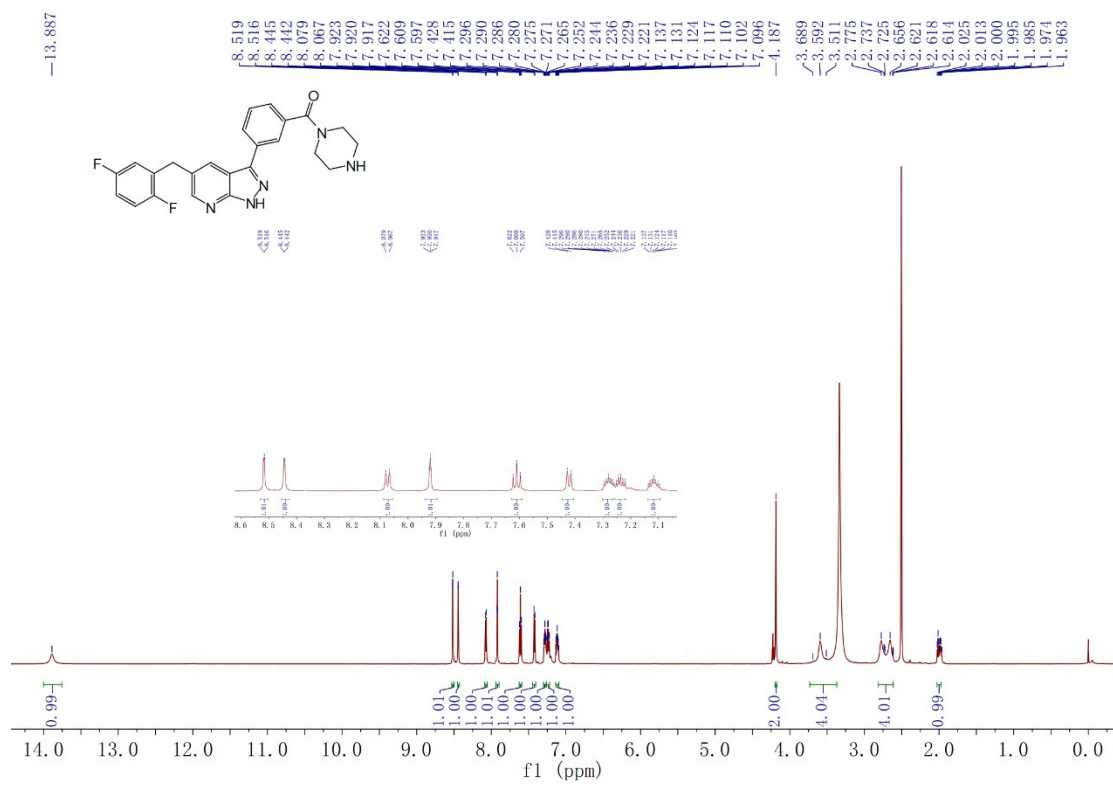

-13.899

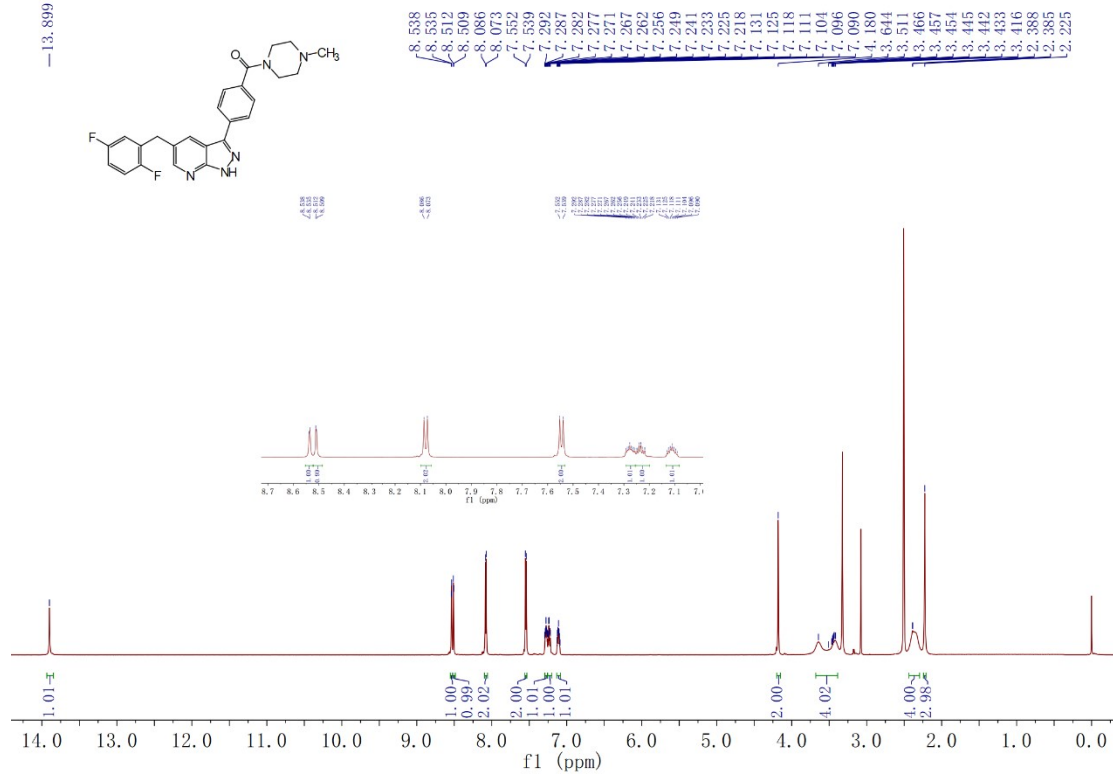

-13.887

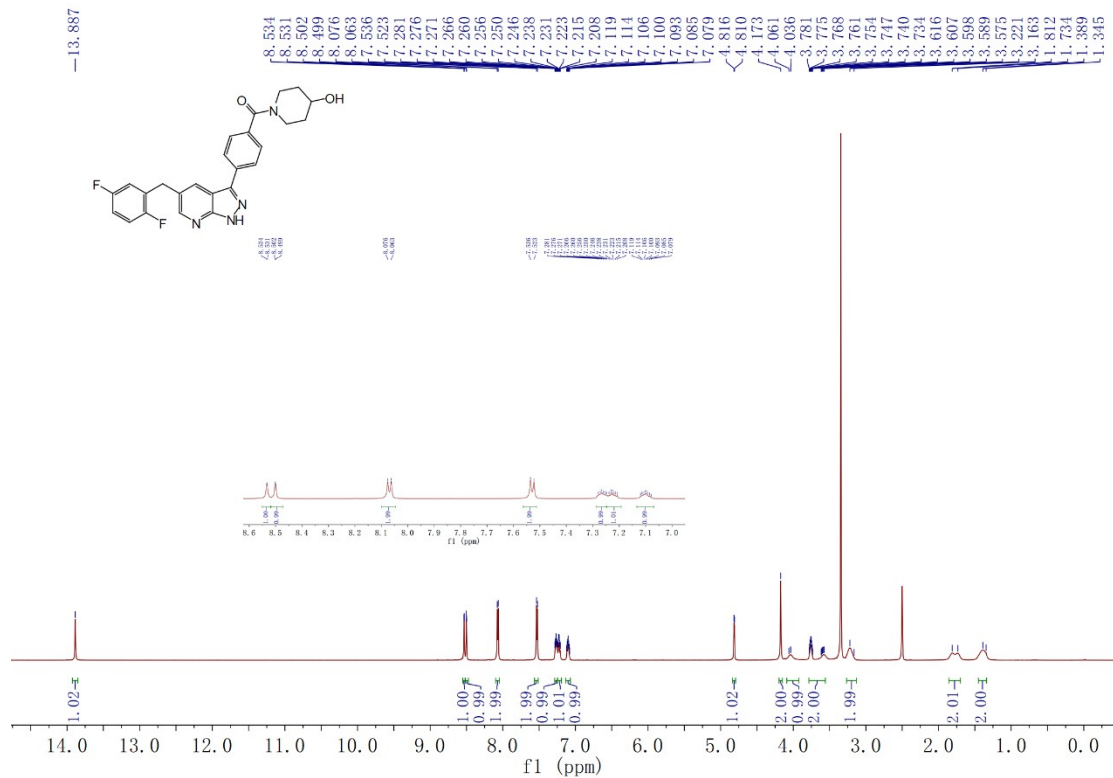

-13.884

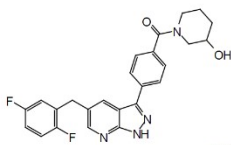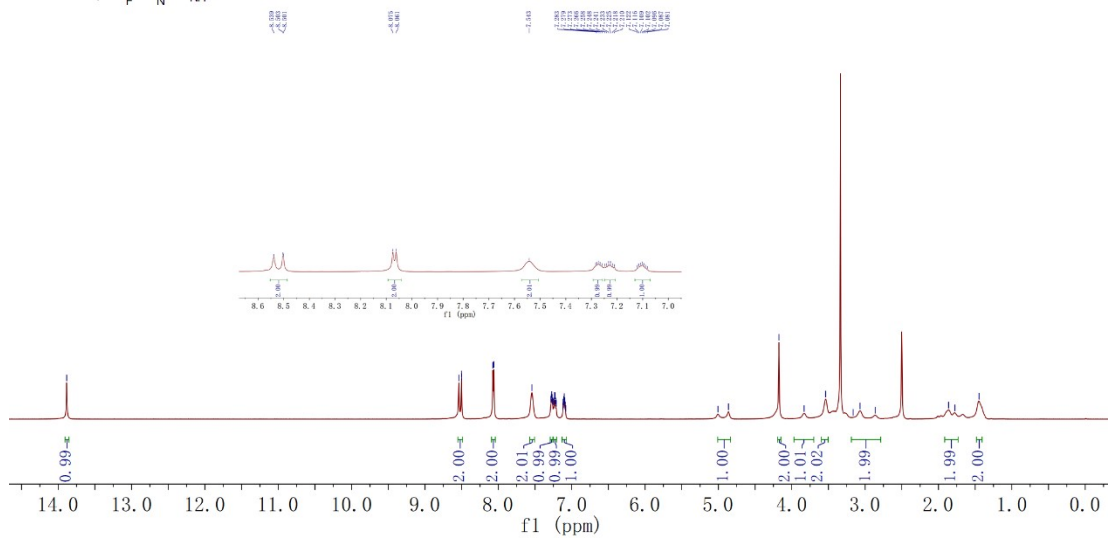

-13.891

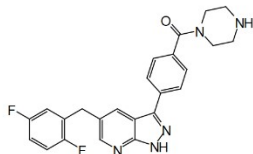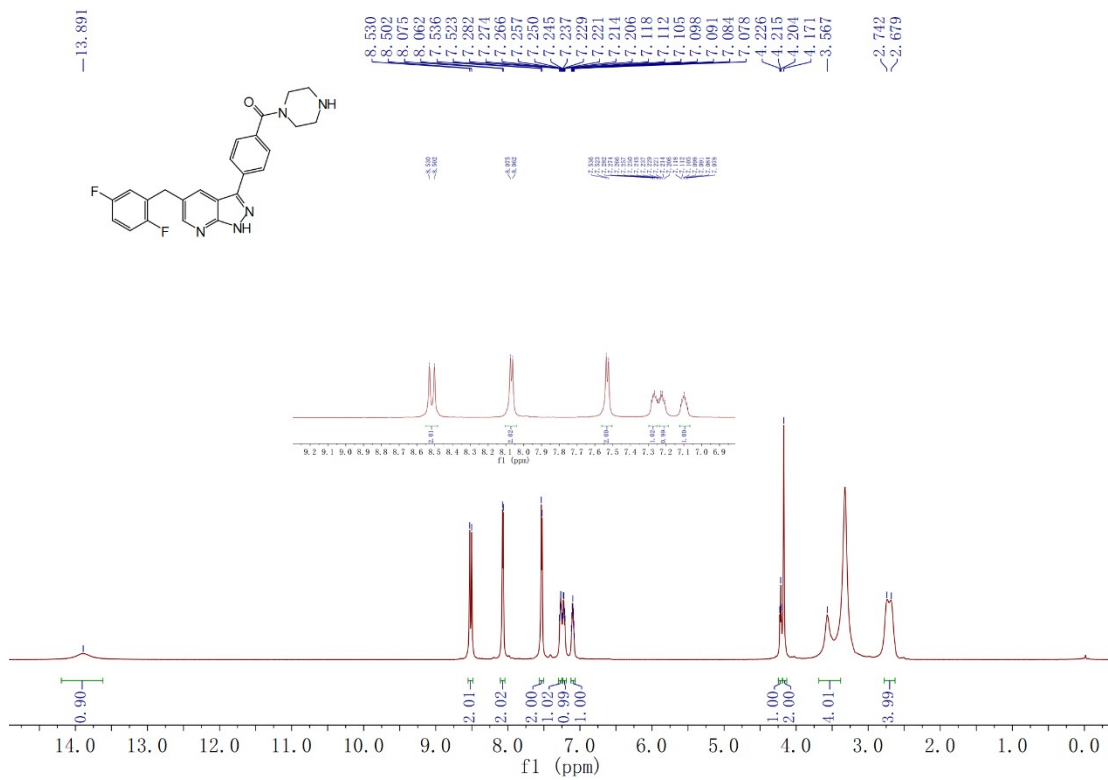





<sup>13</sup>C-NMR spectra of compound referred in the article and the structure of compound is noted in the spectrum.

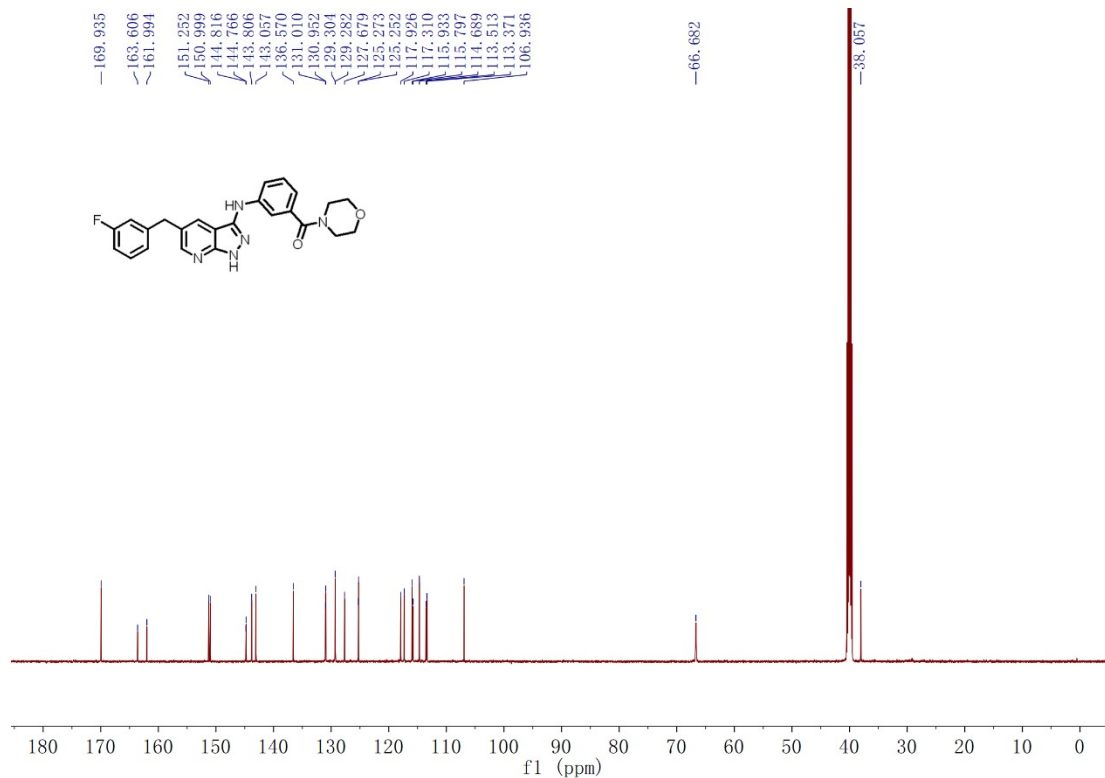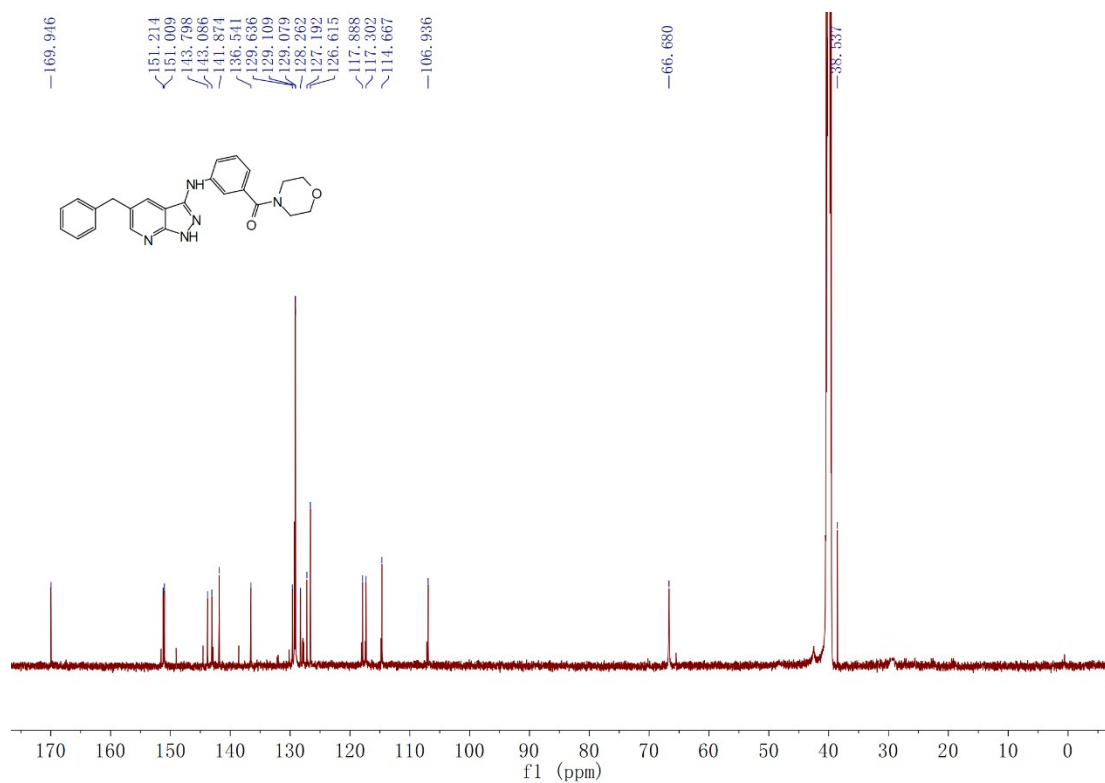



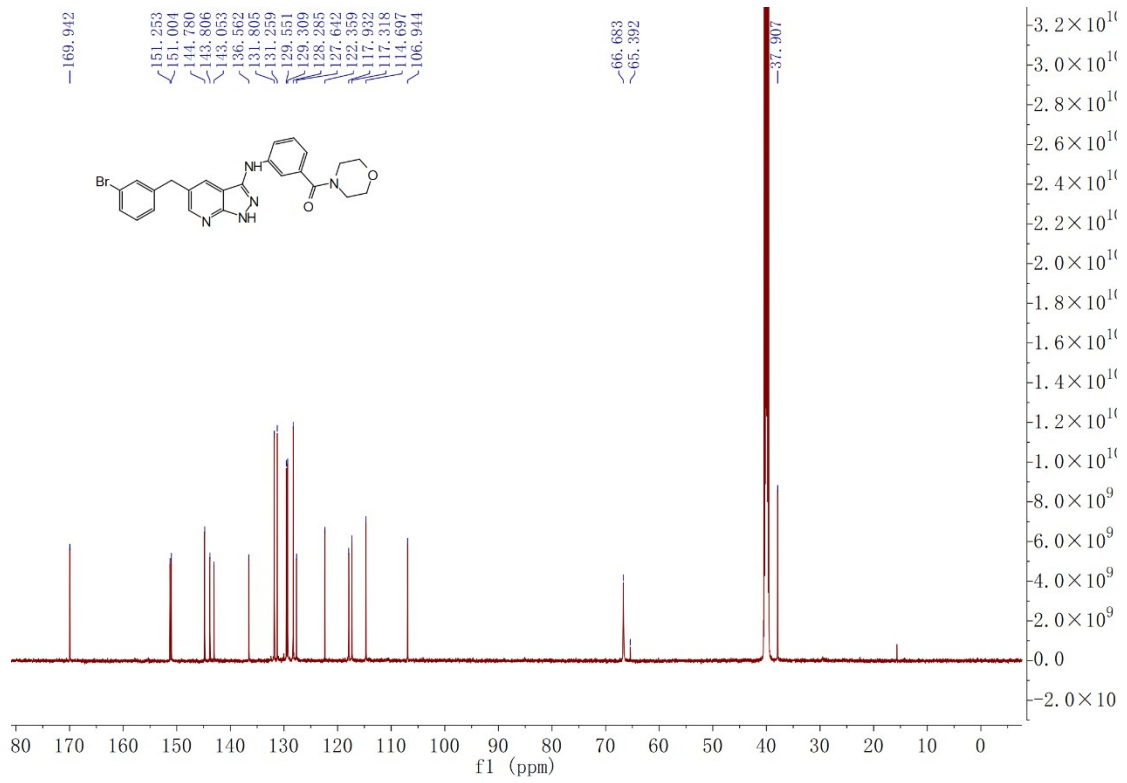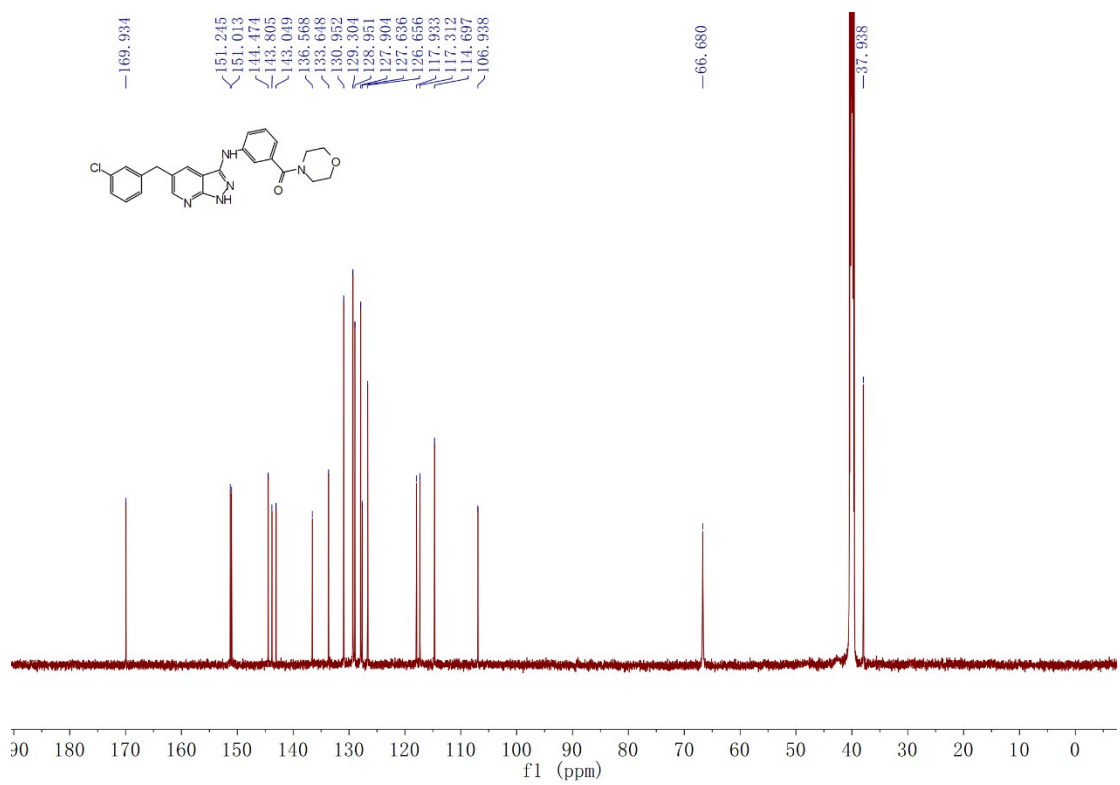

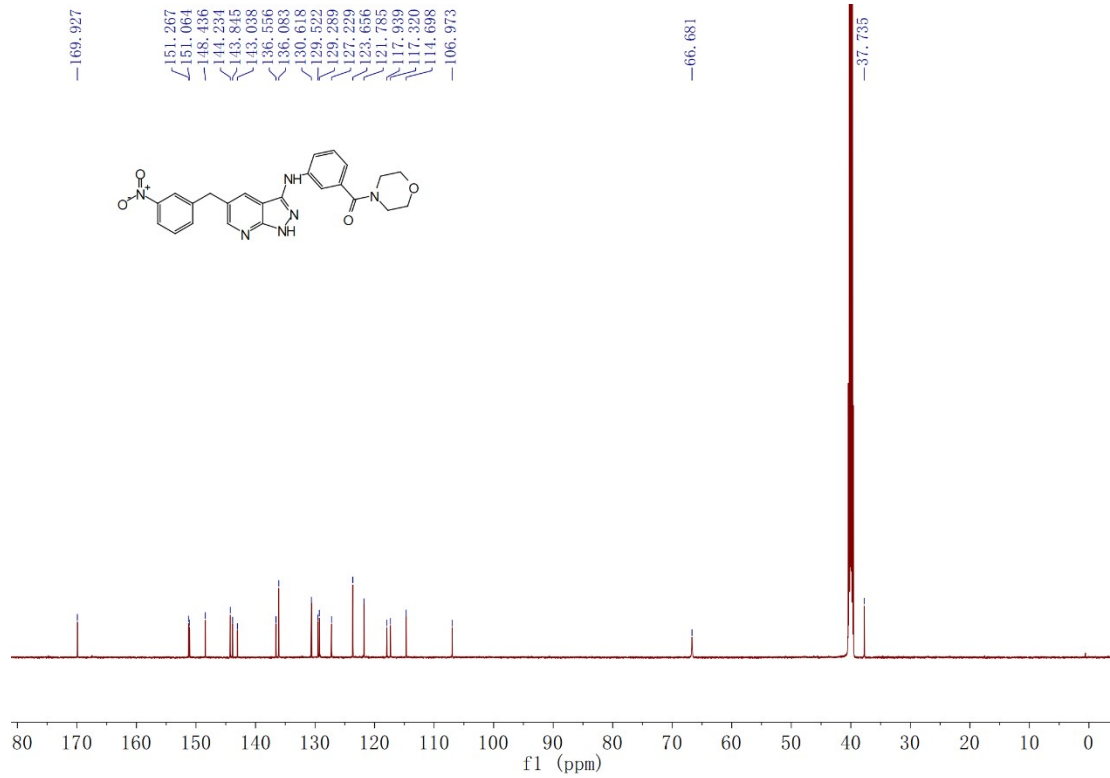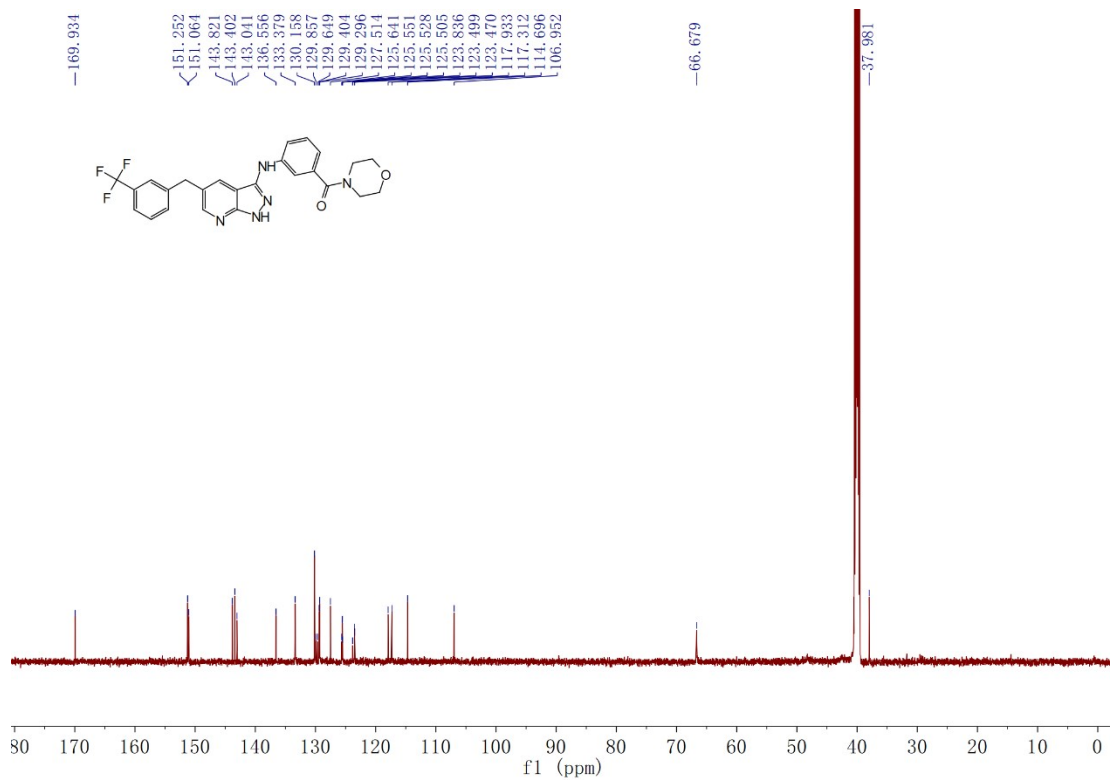

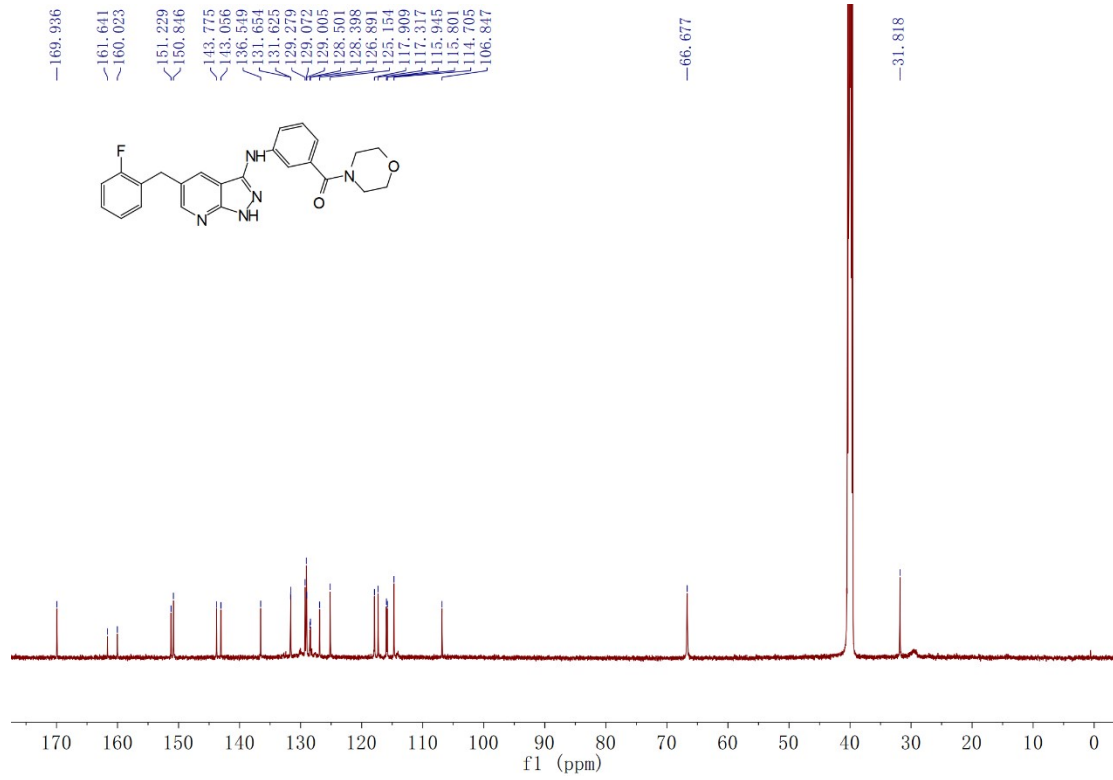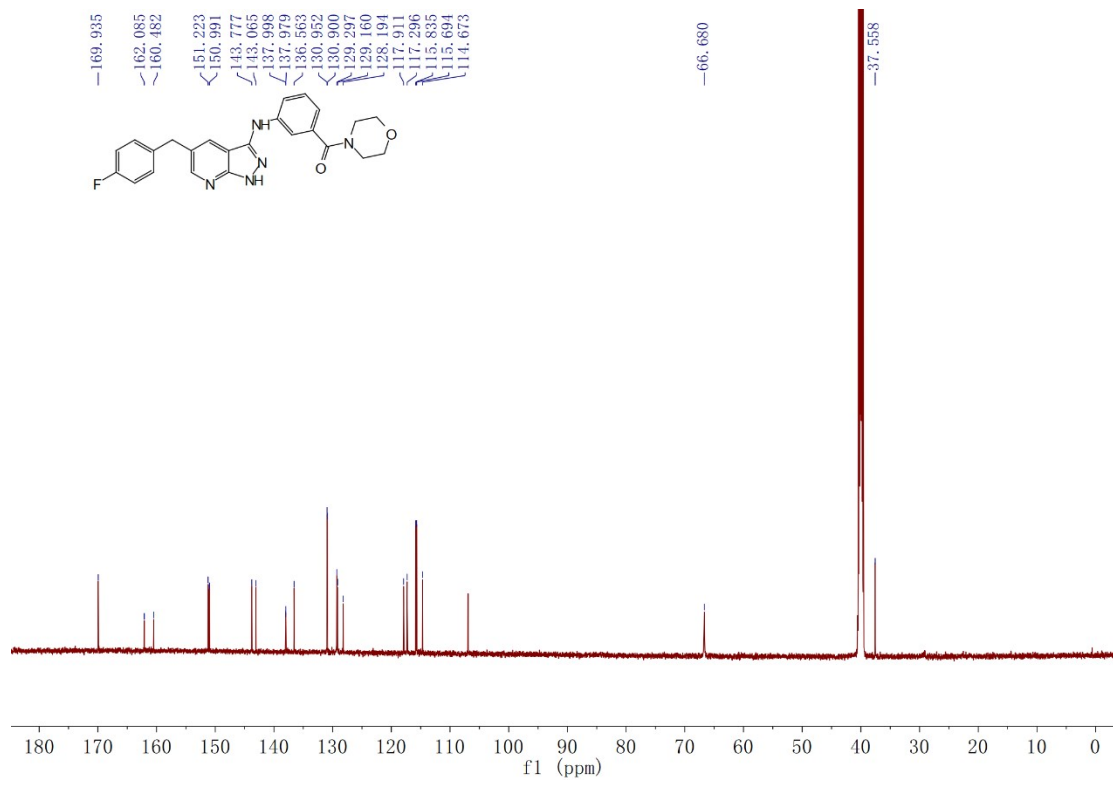

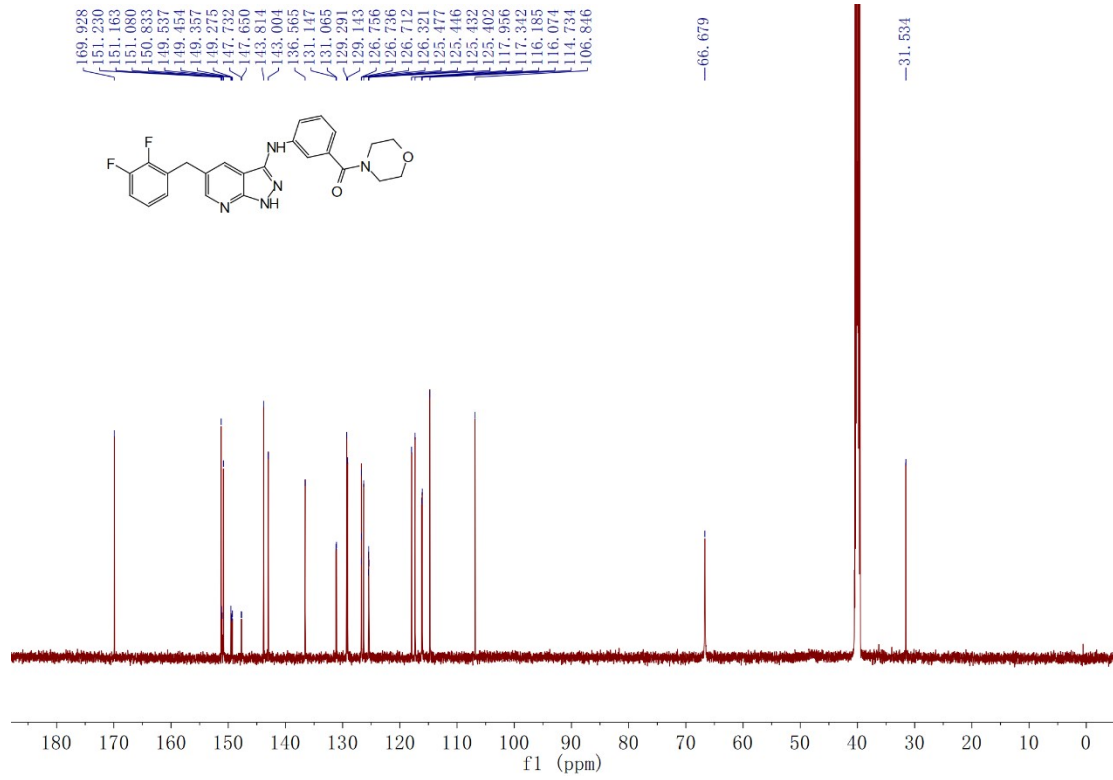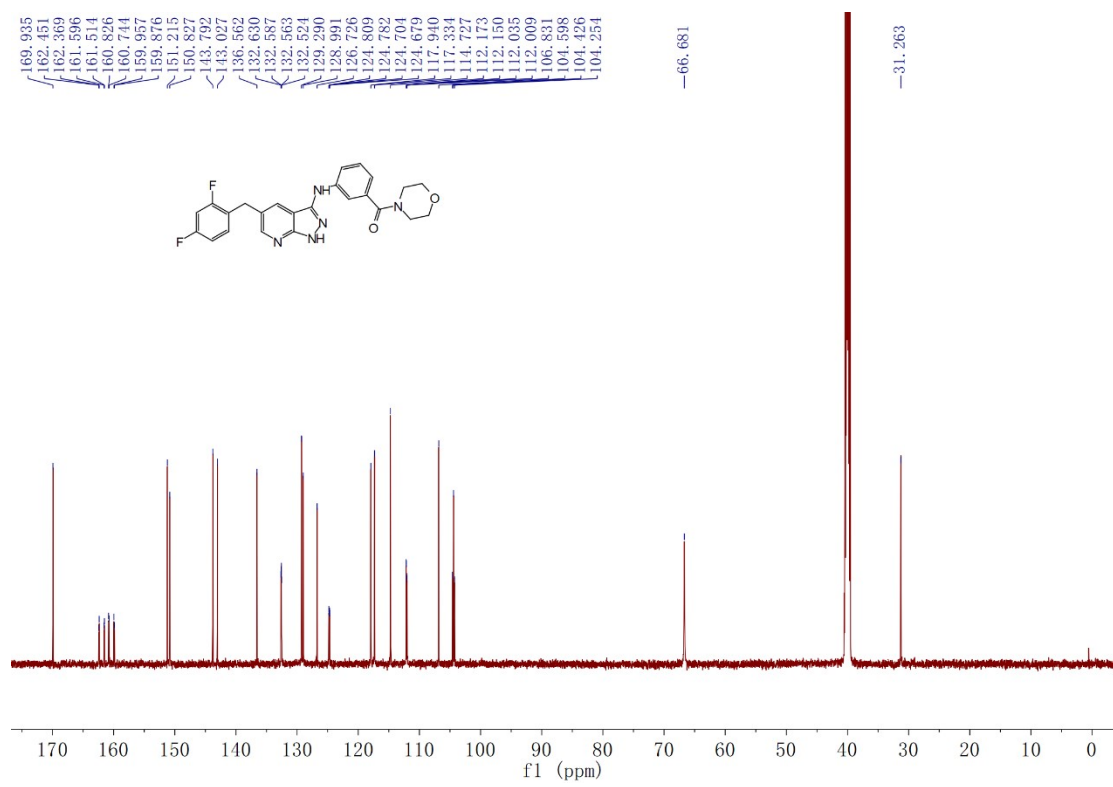

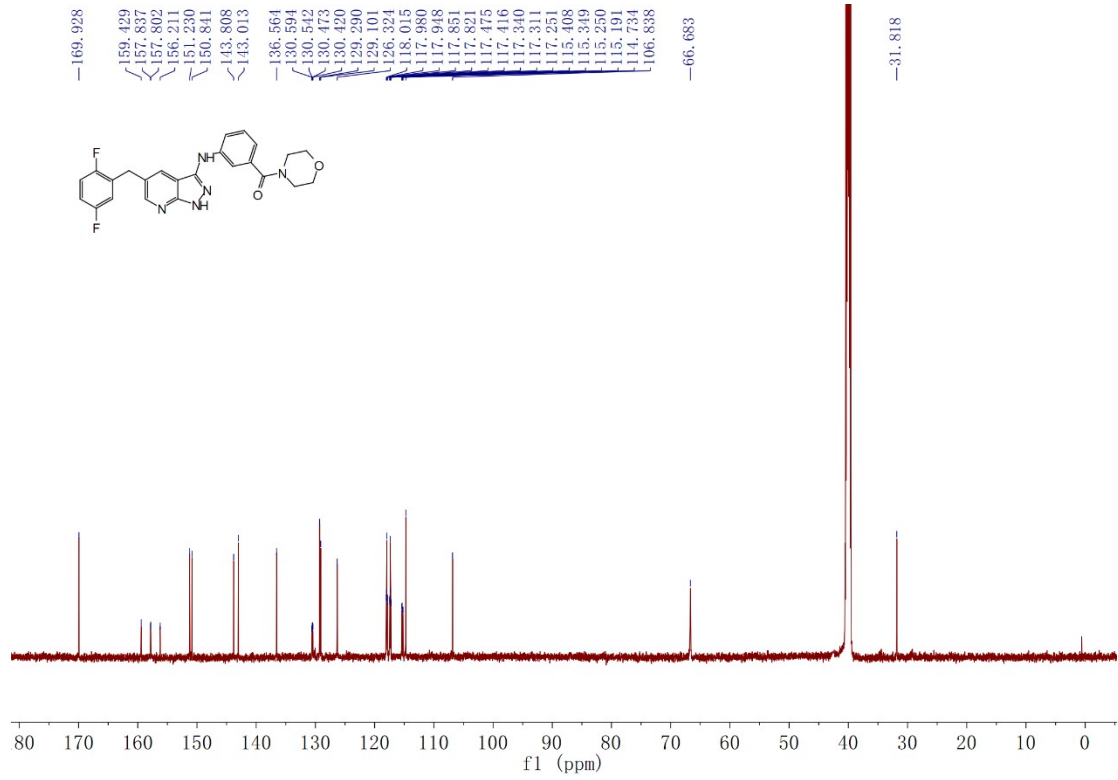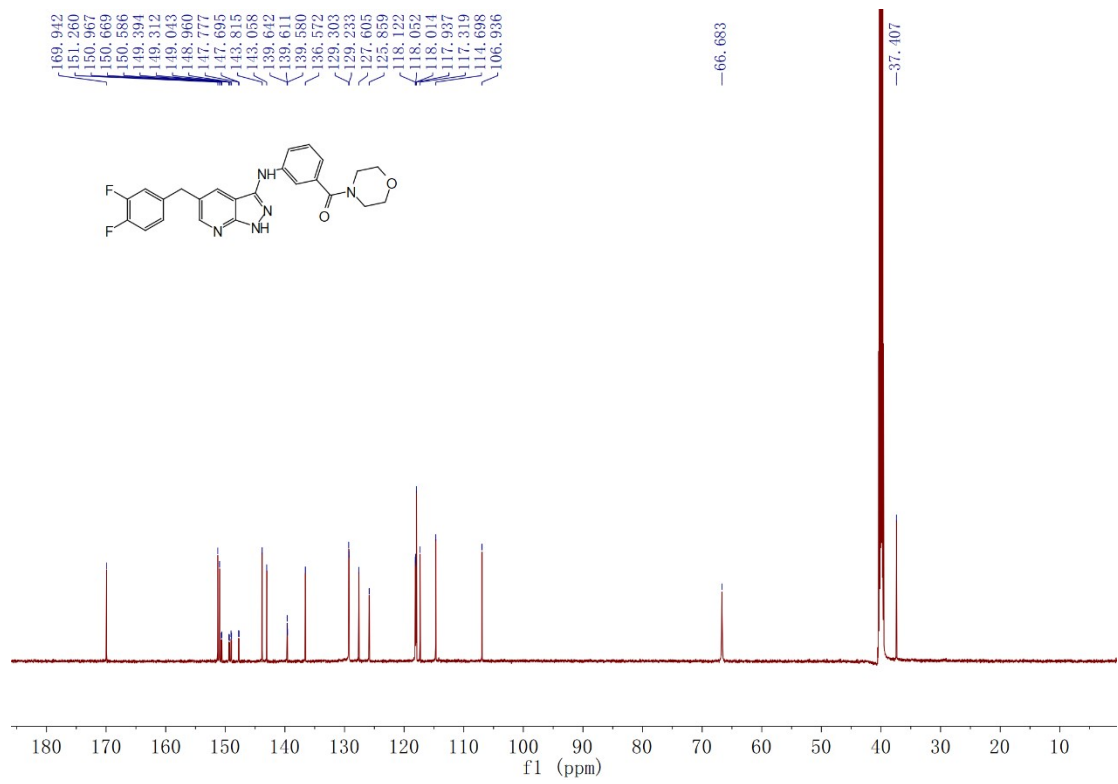

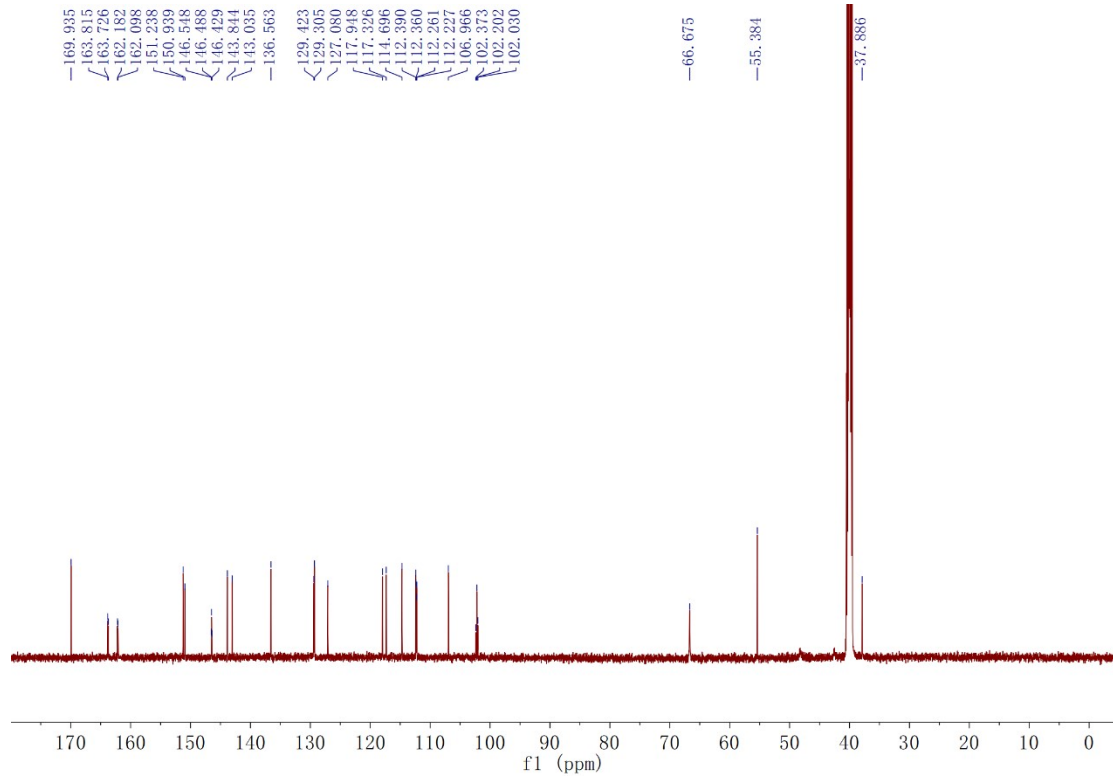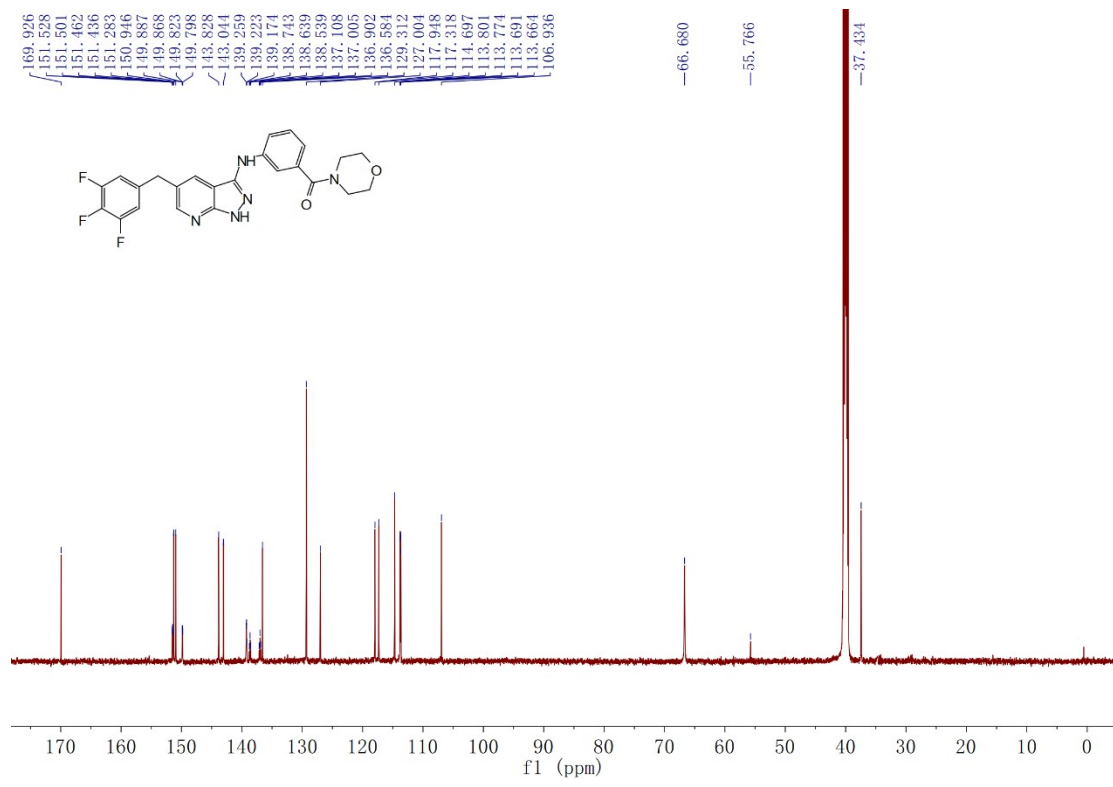

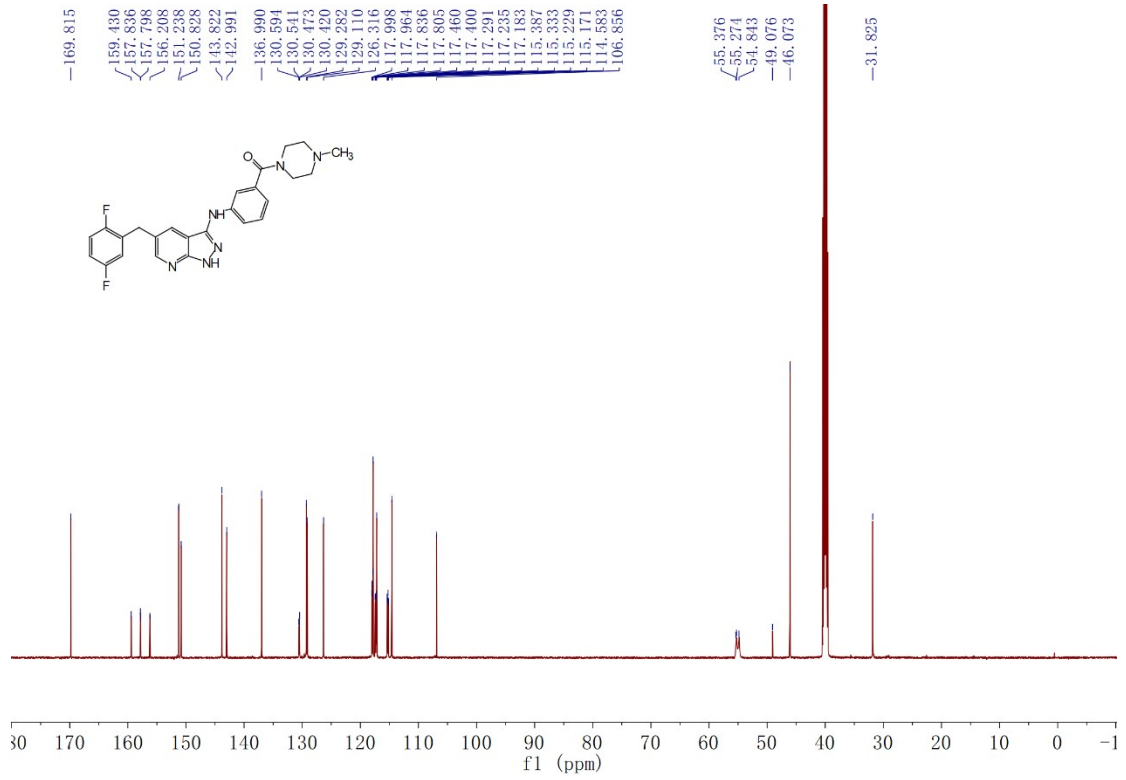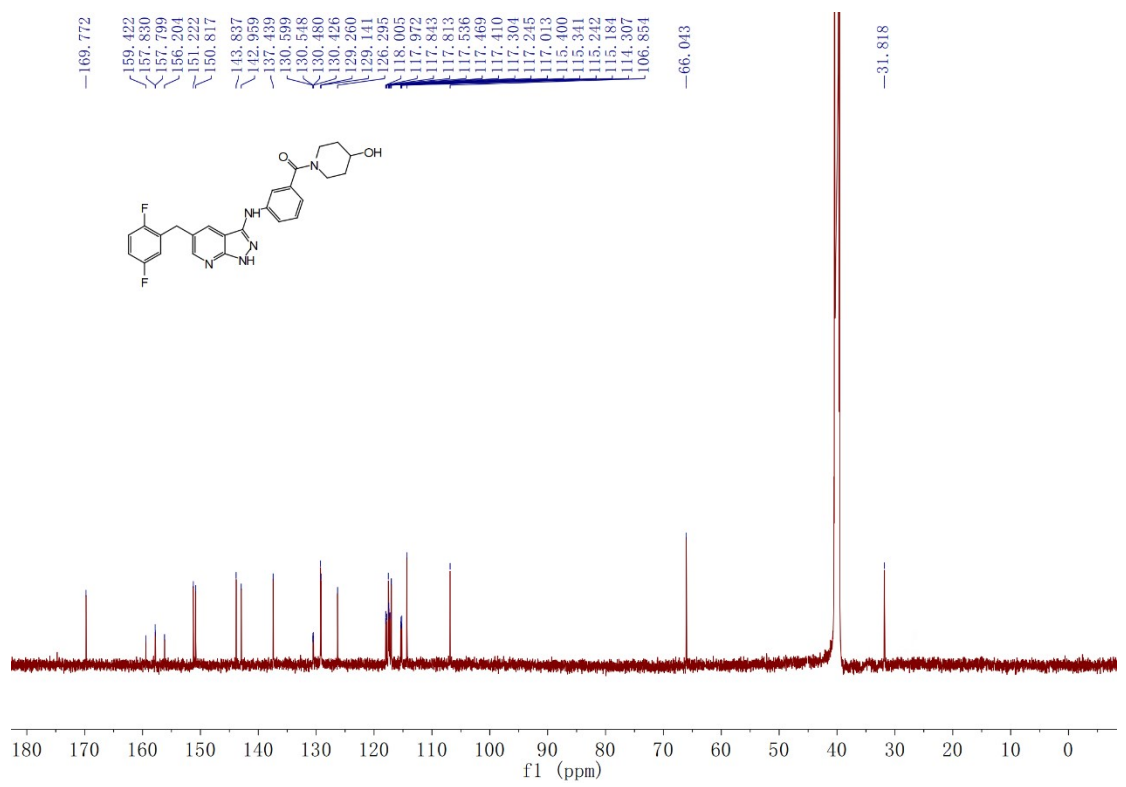

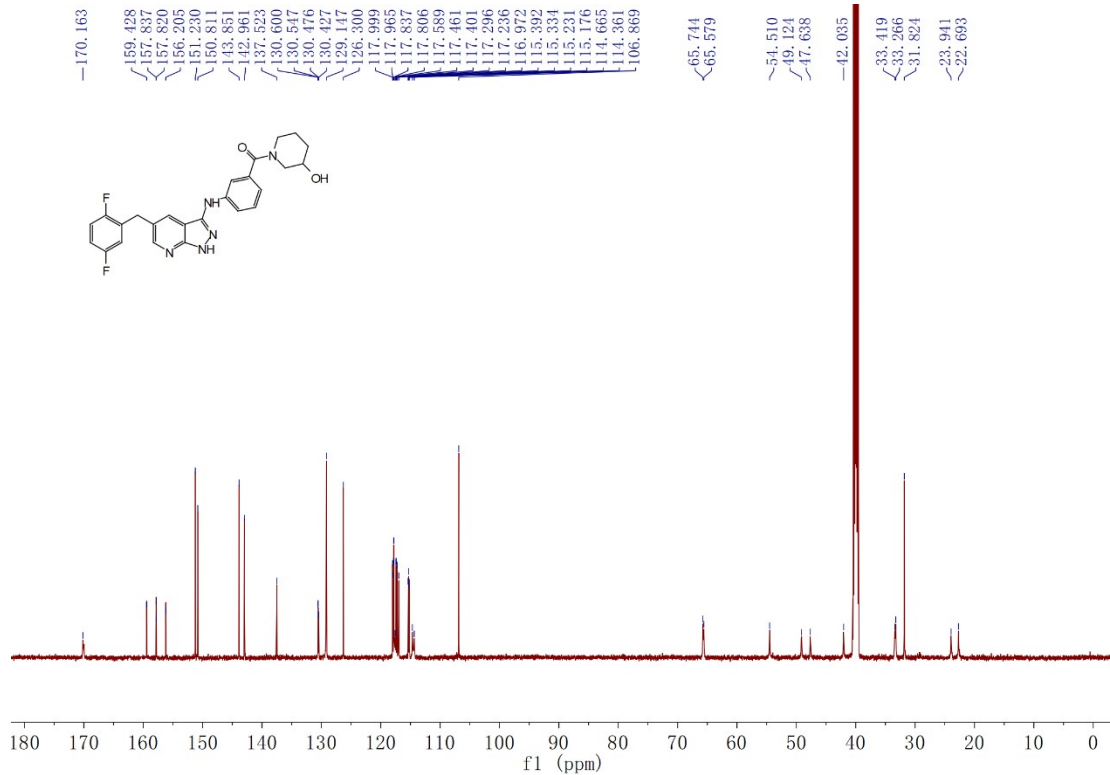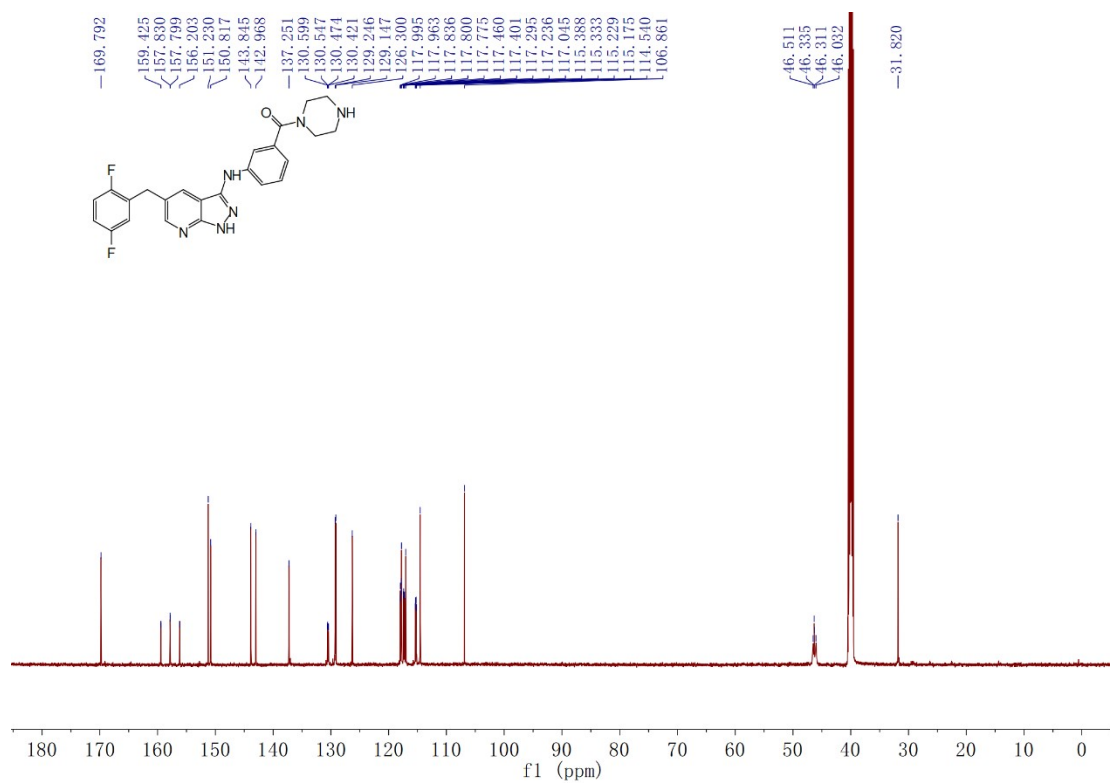



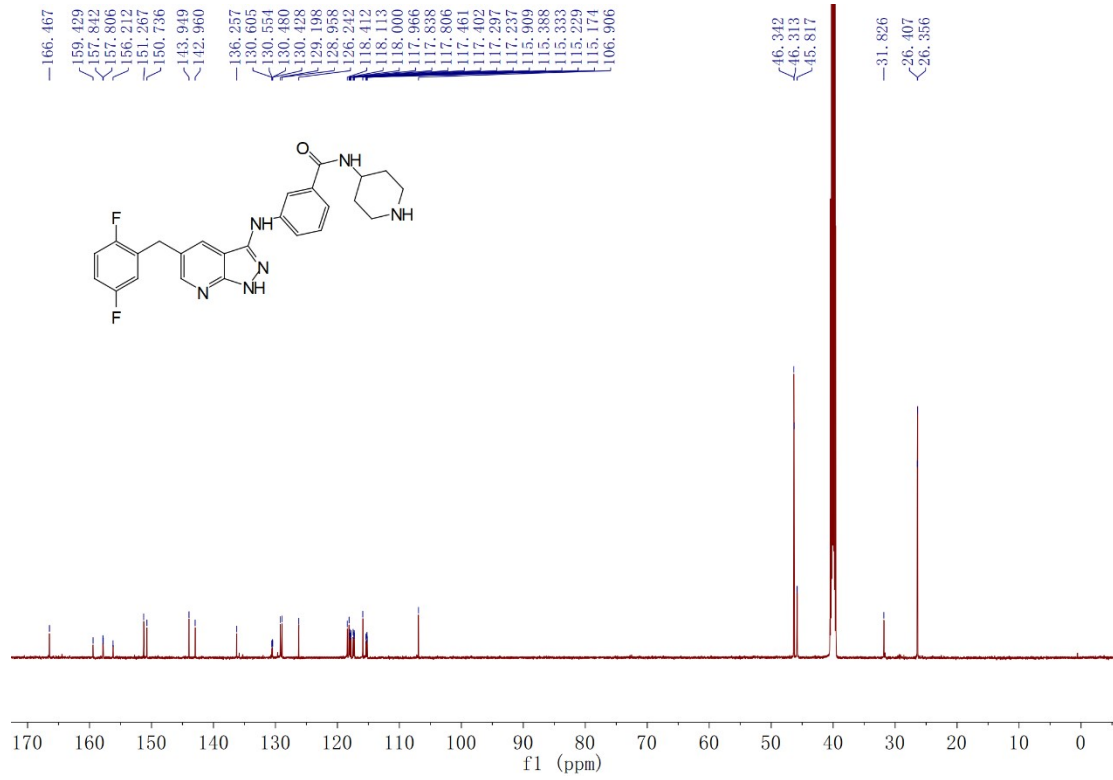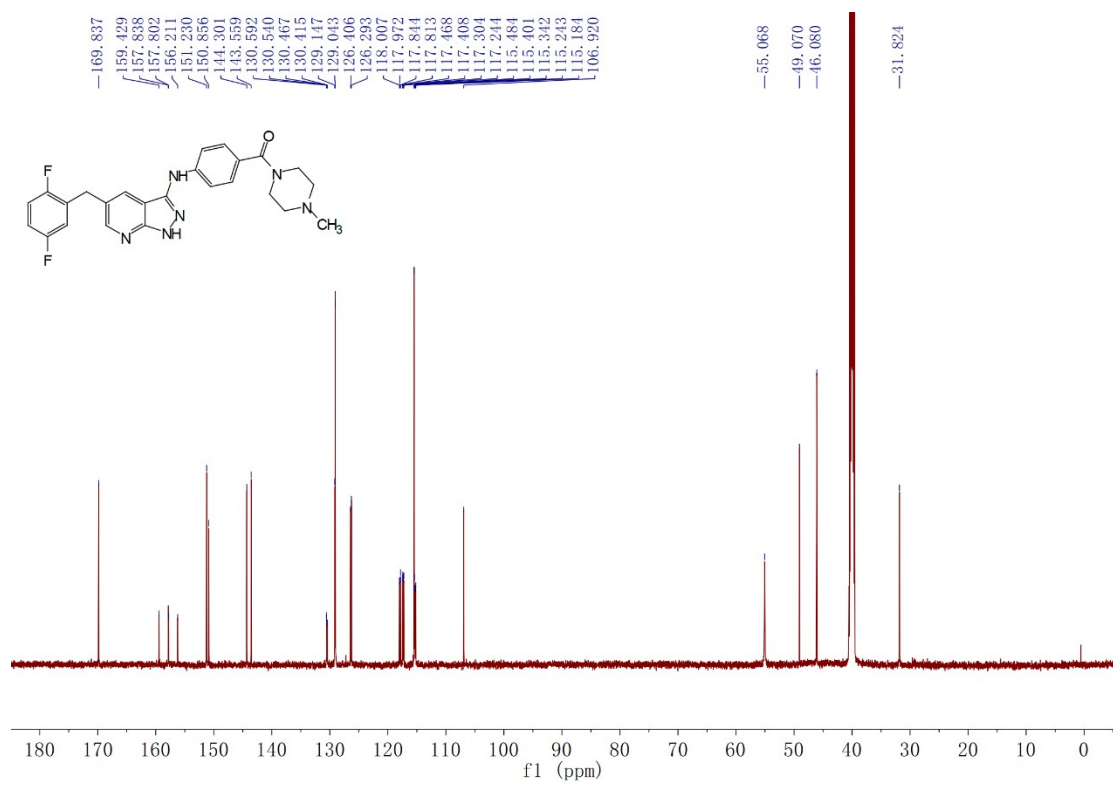

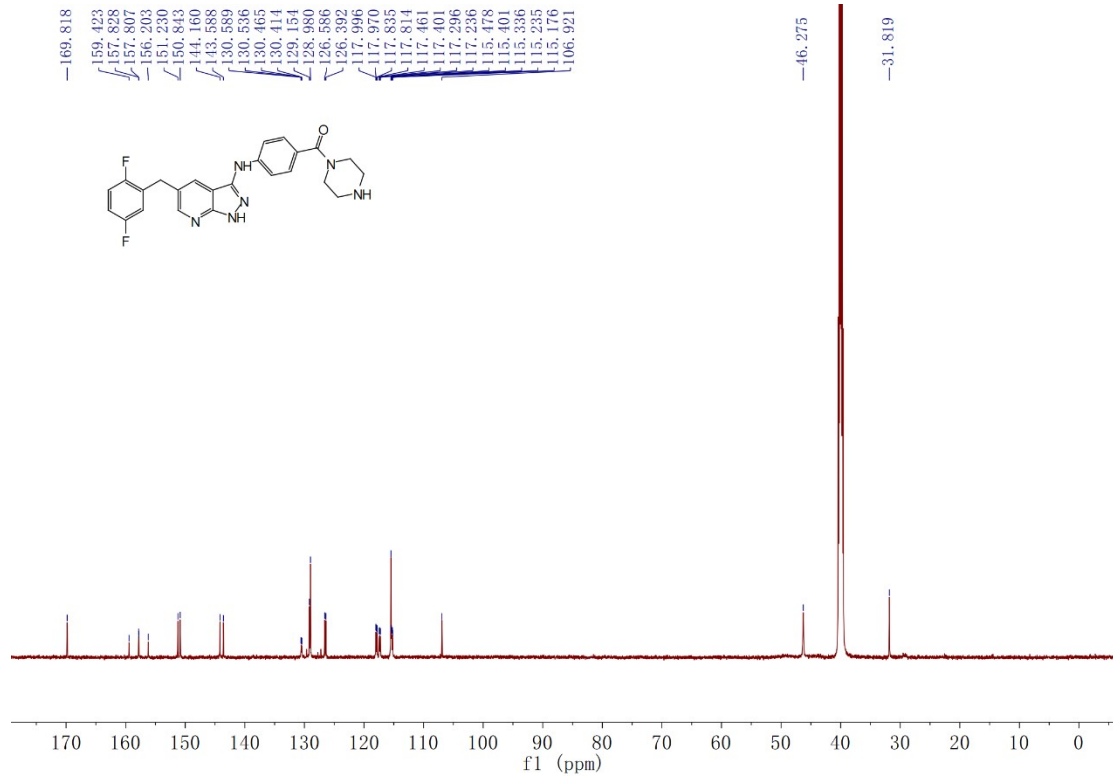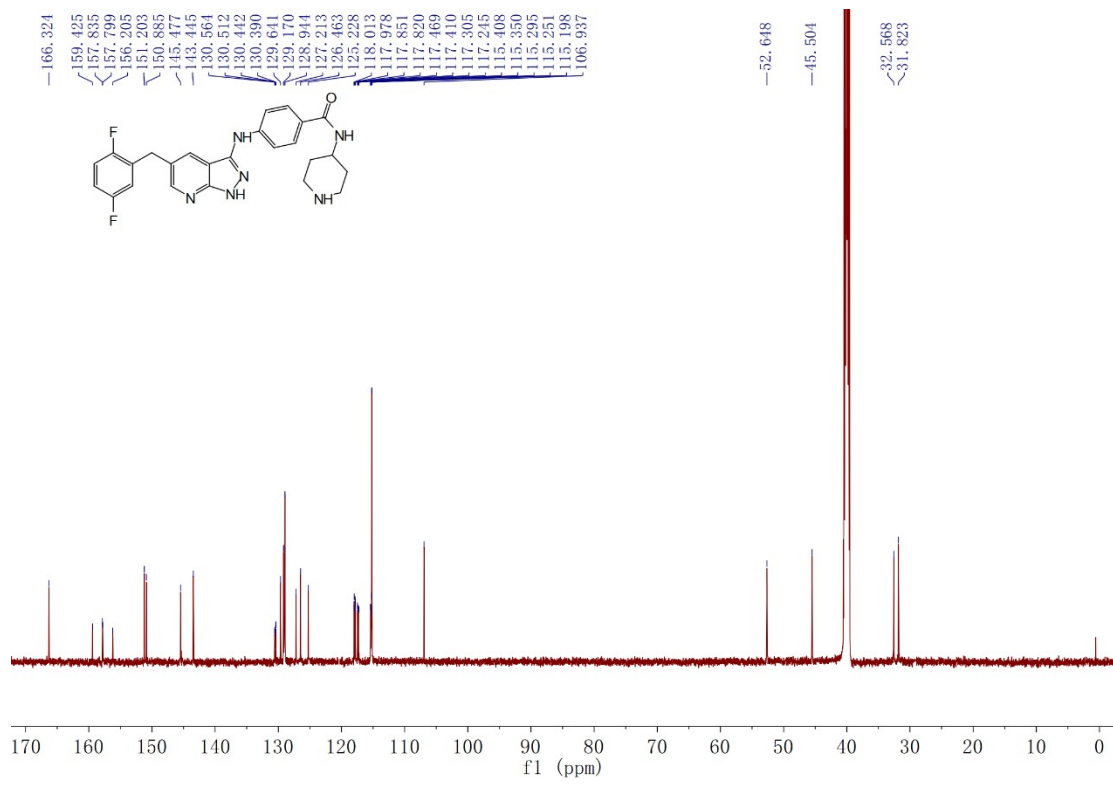

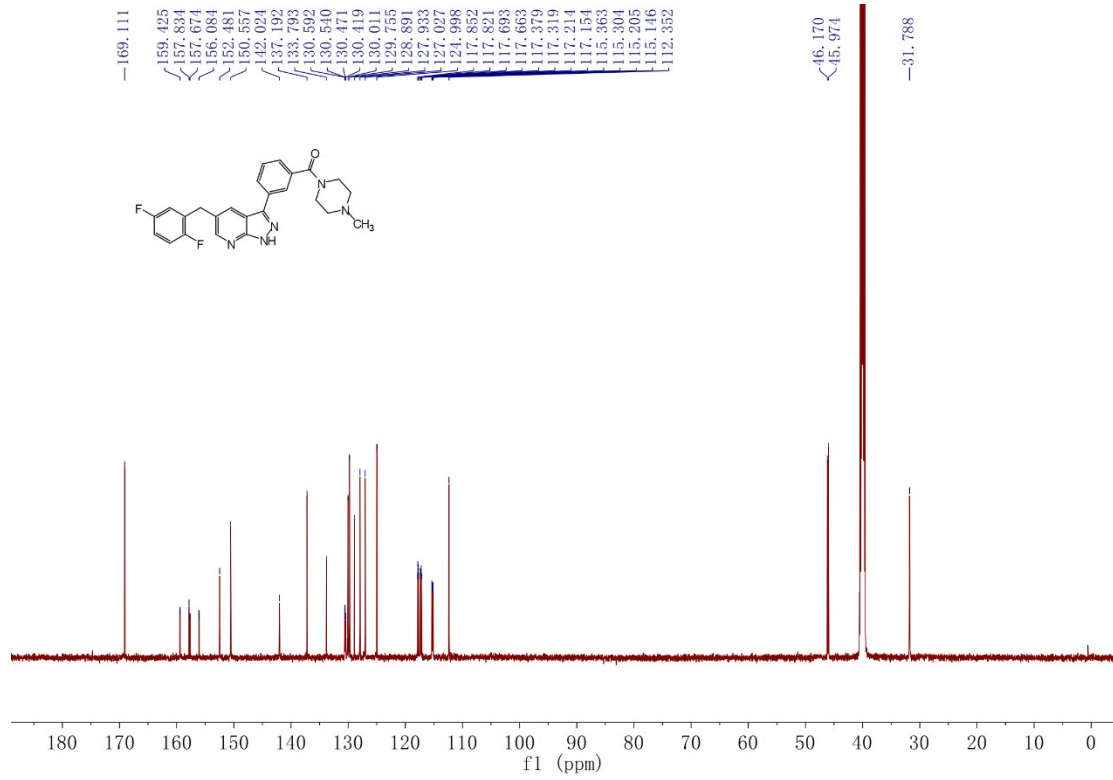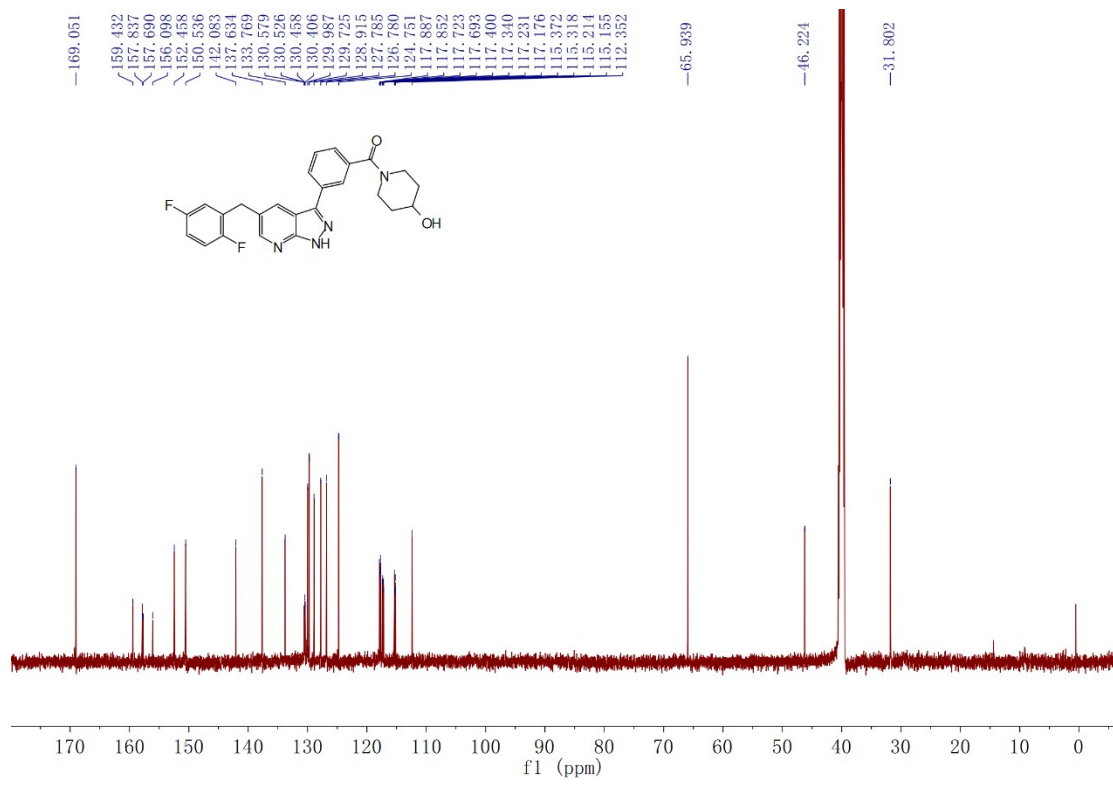

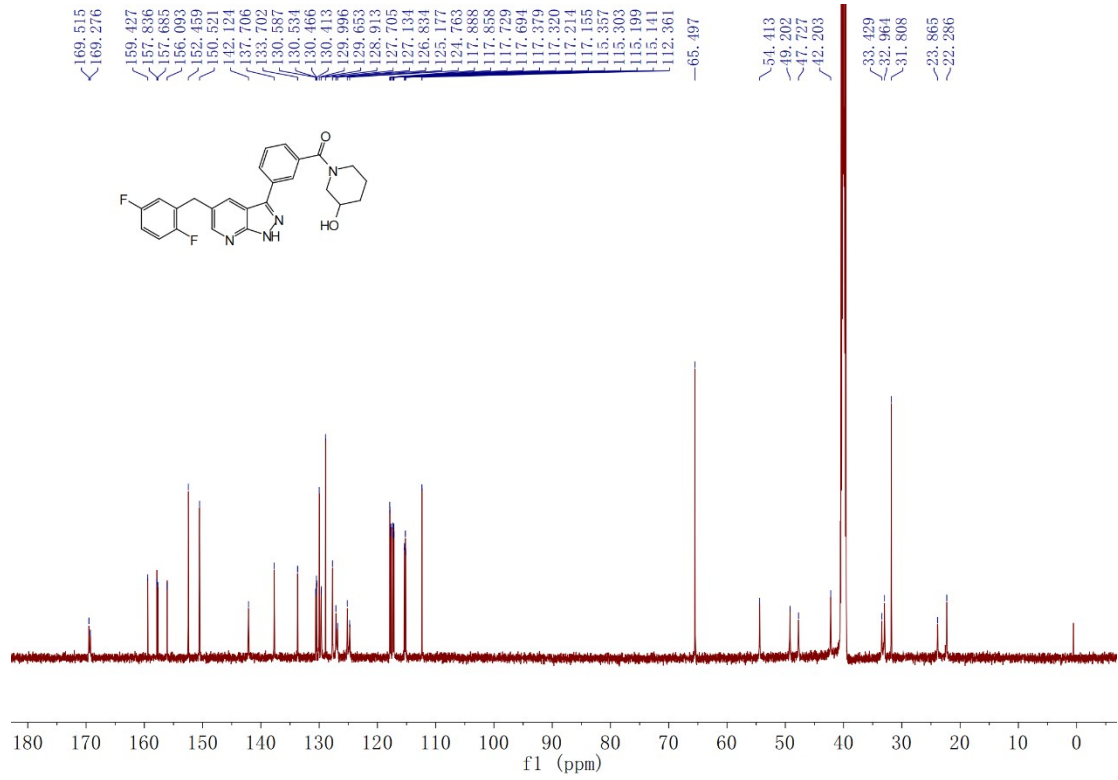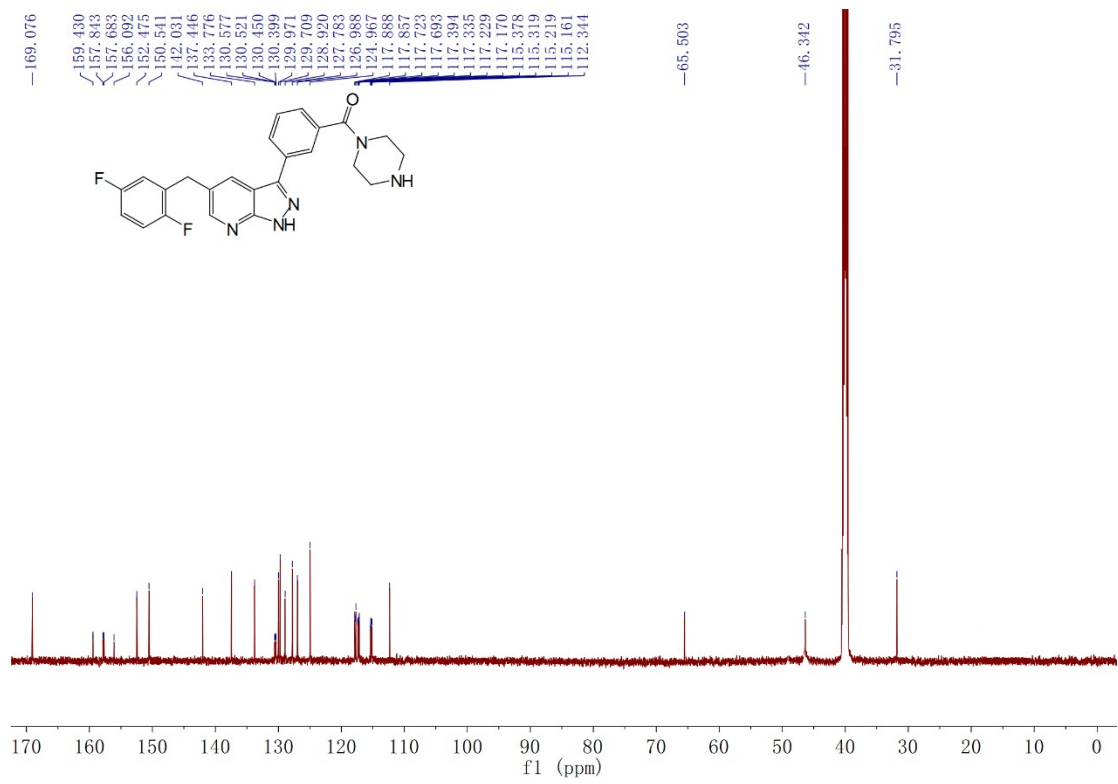

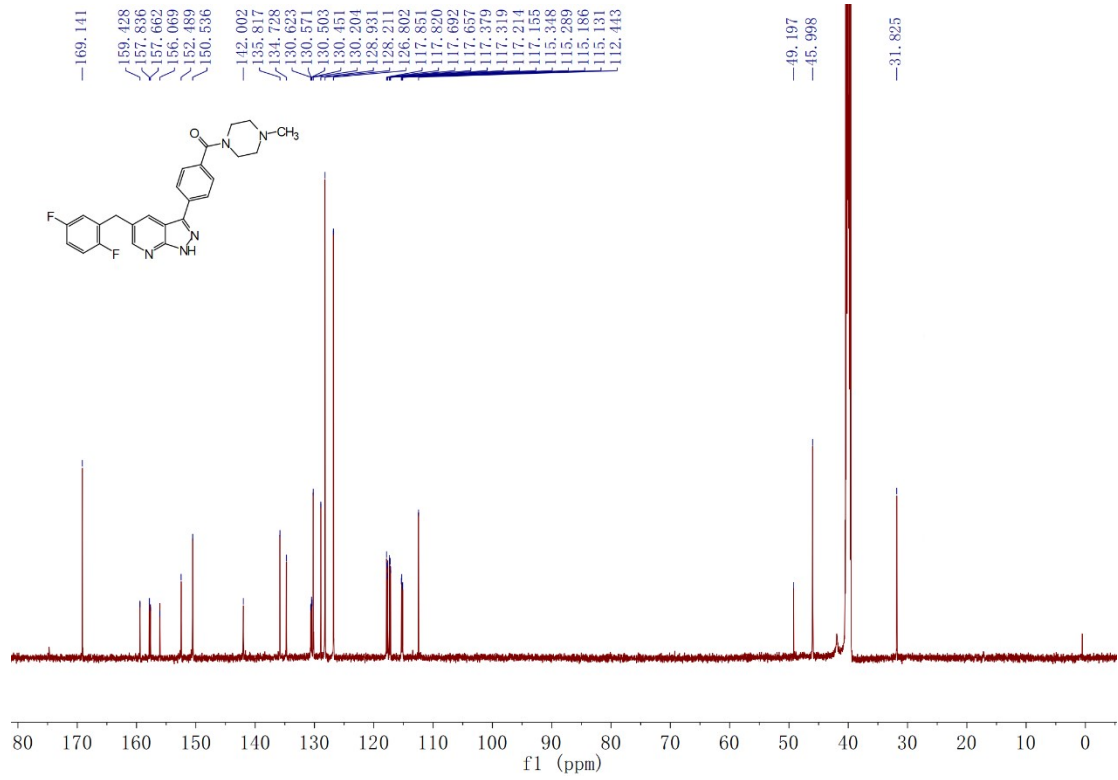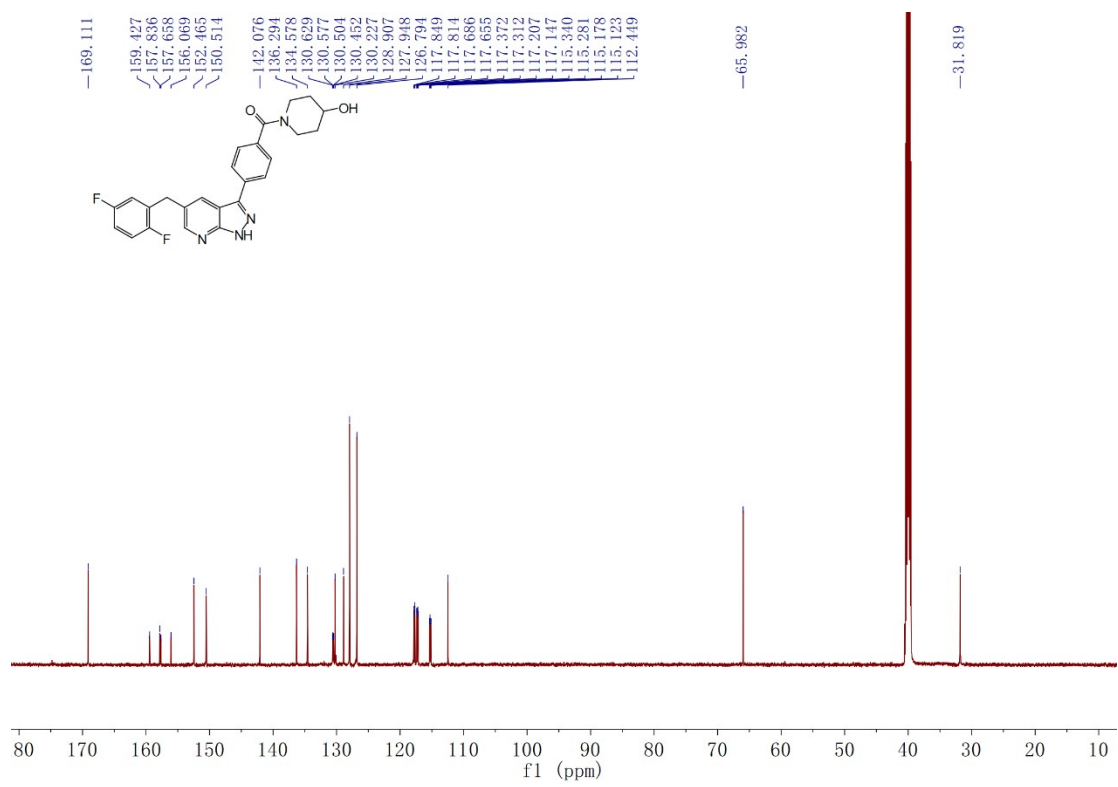

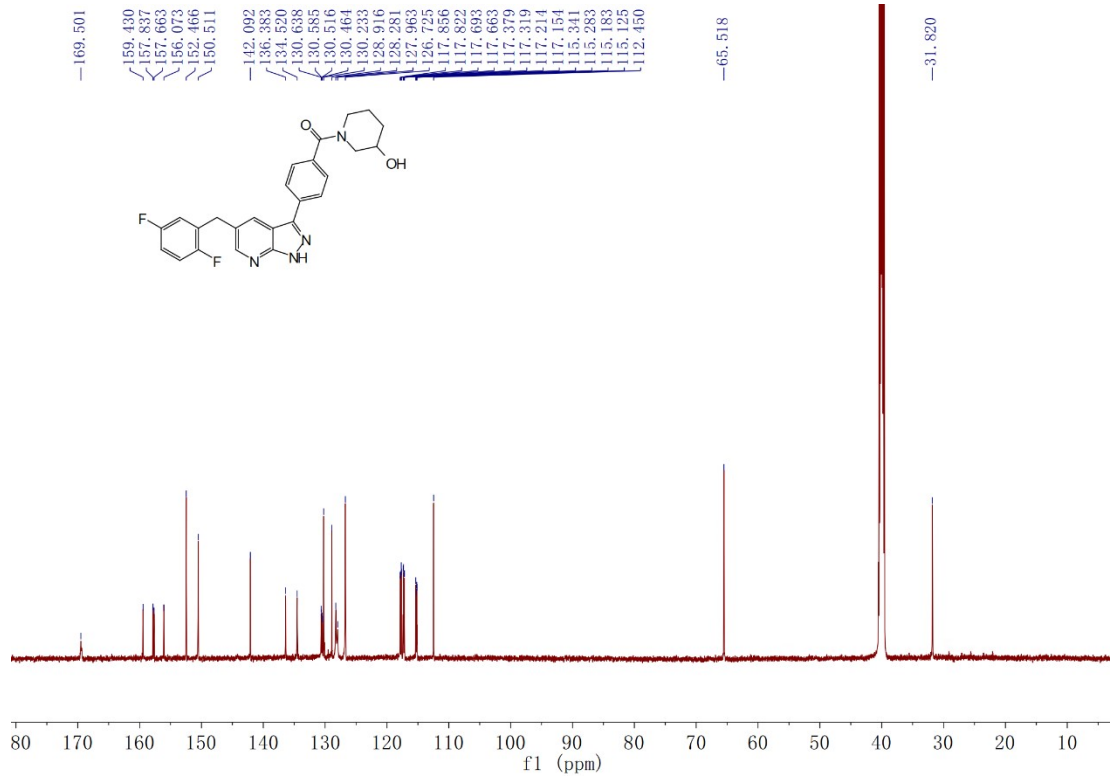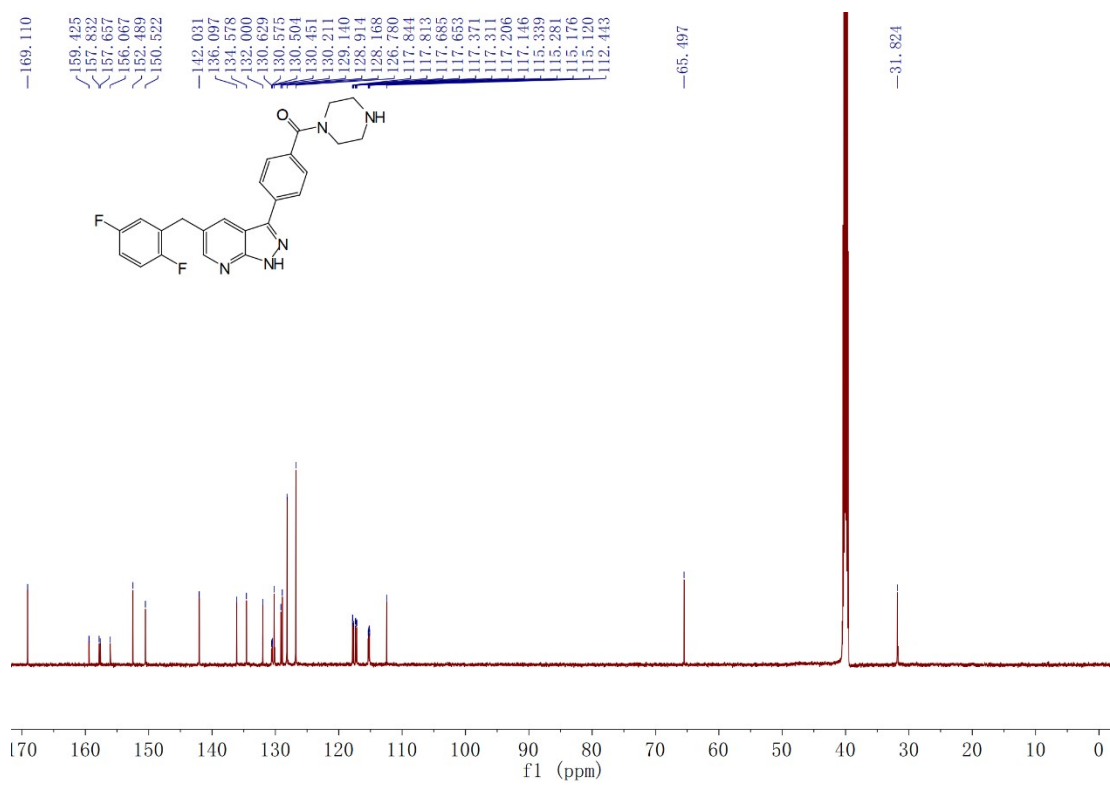

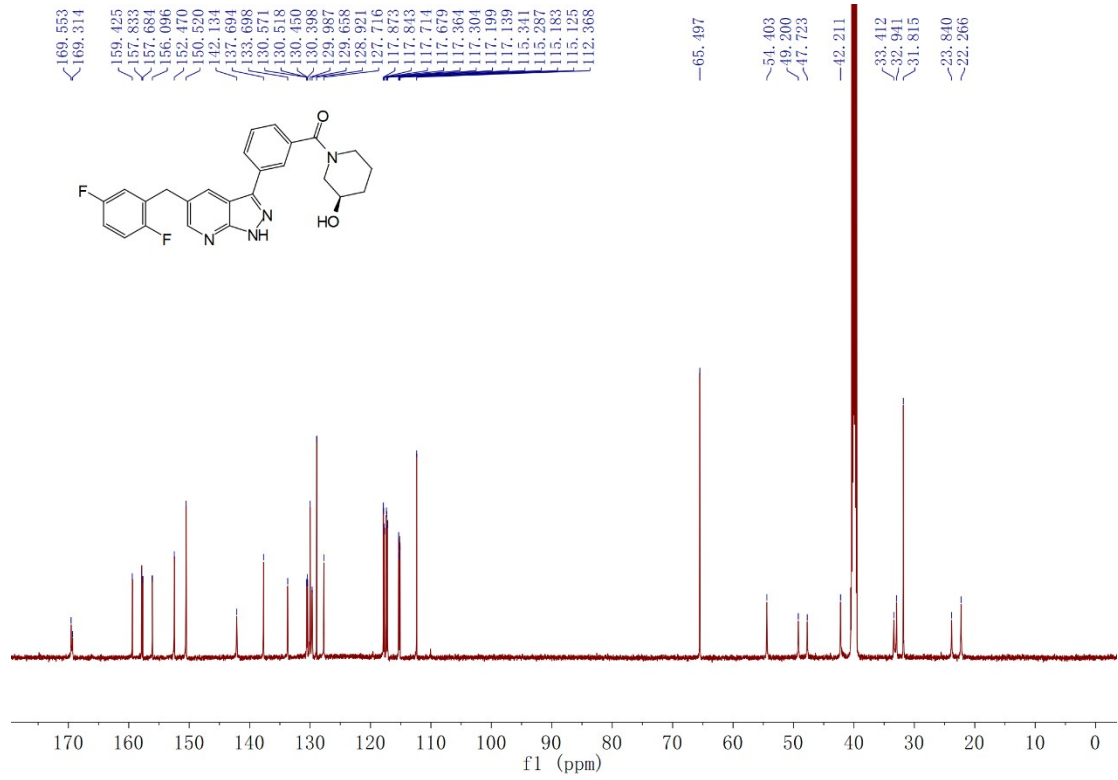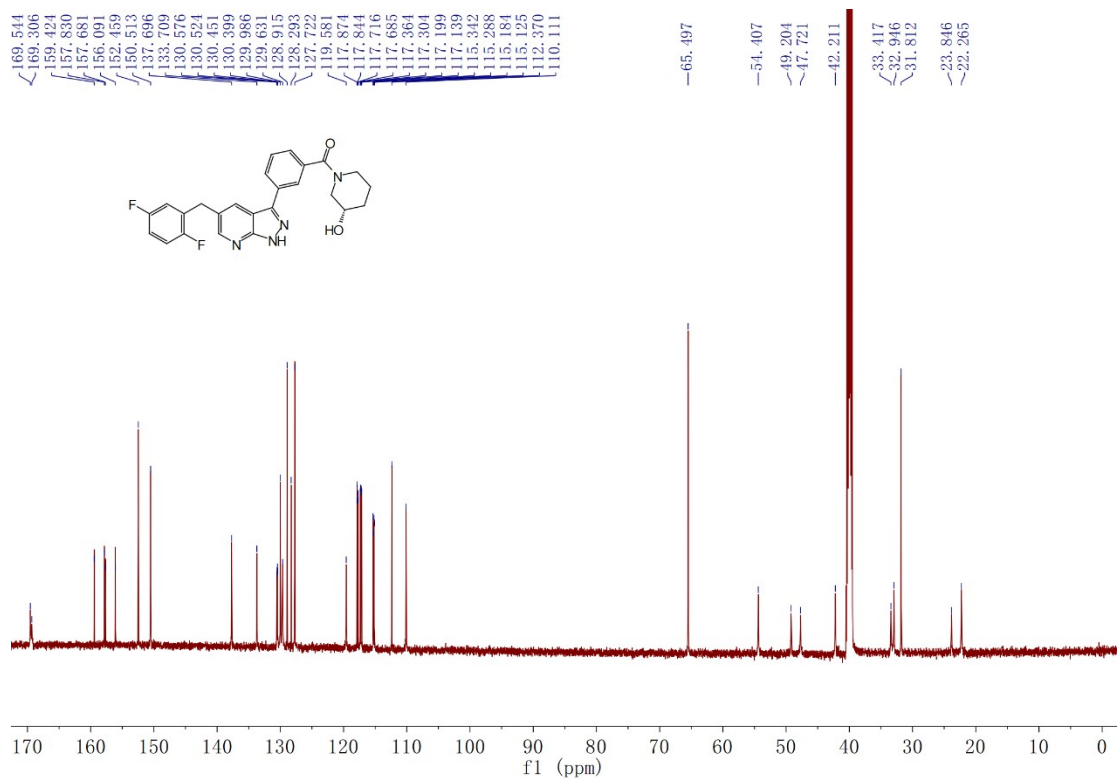

### LC-MS spectra of A02

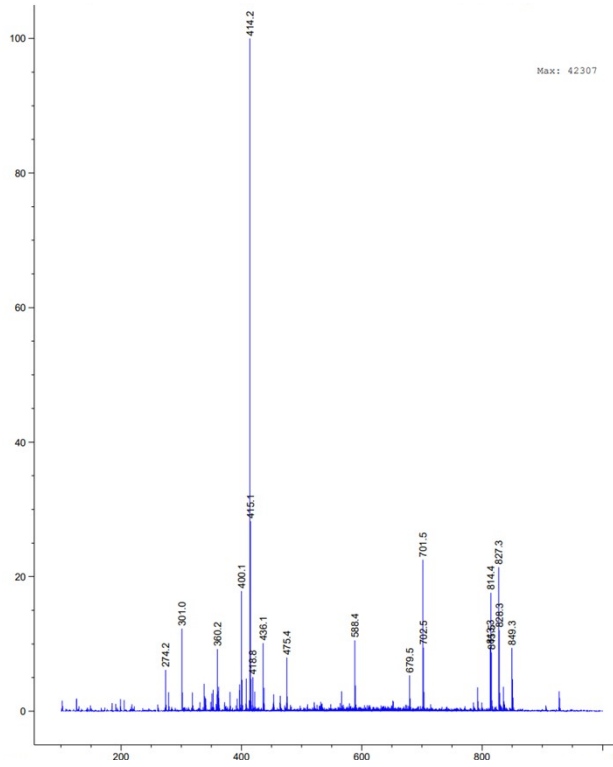

### LC-MS spectra of A03

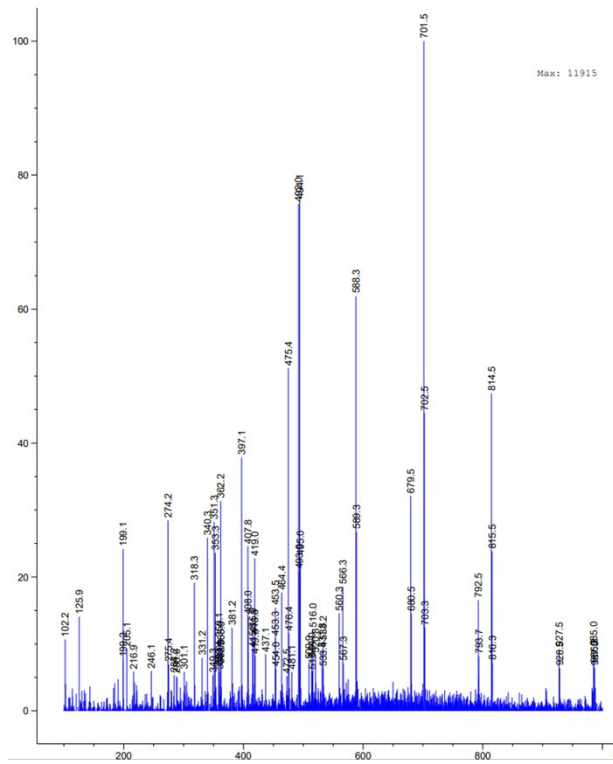



### LC-MS spectra of A04

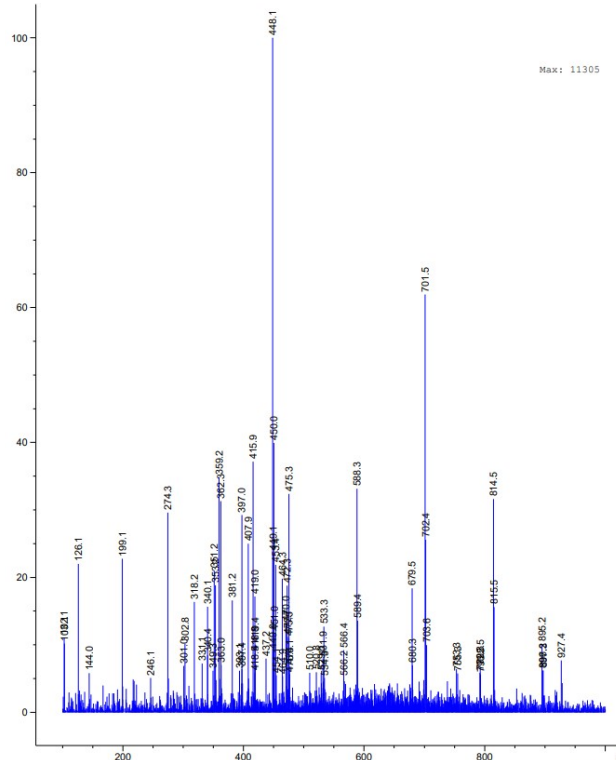

### LC-MS spectra of A05

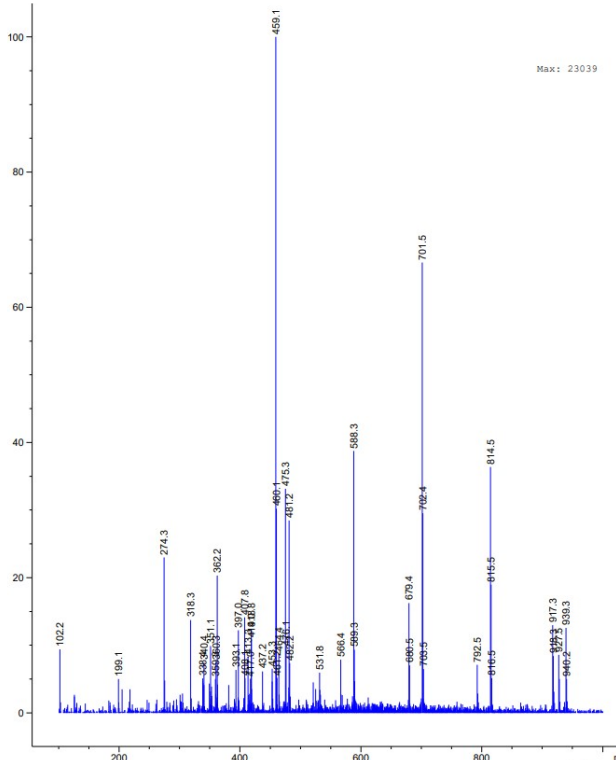

### LC-MS spectra of A06

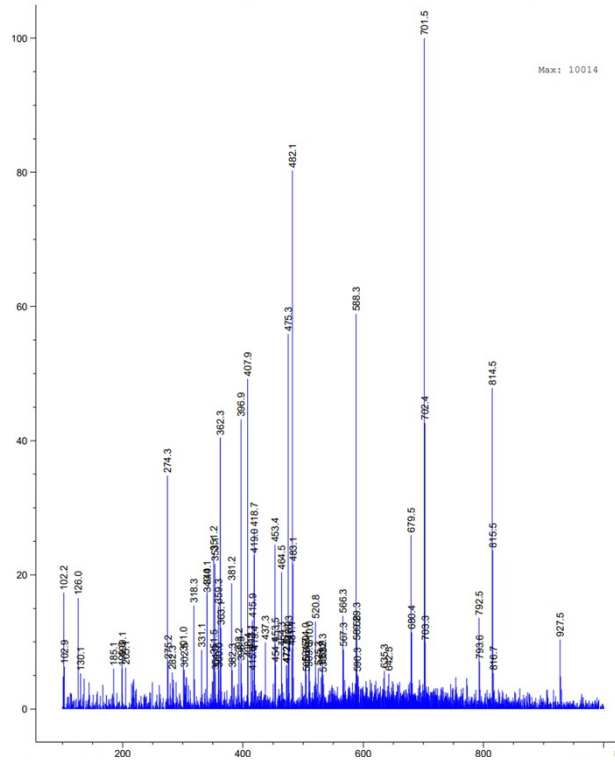

### LC-MS spectra of A07

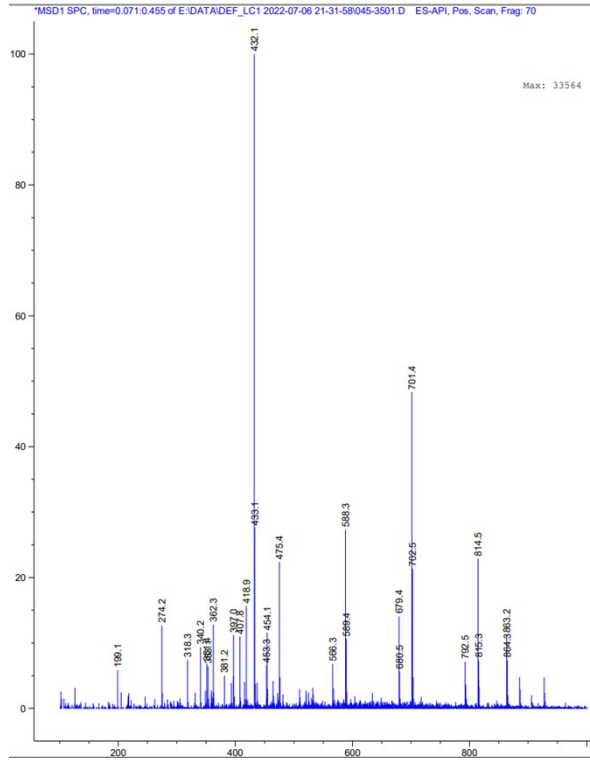

### LC-MS spectra of A08

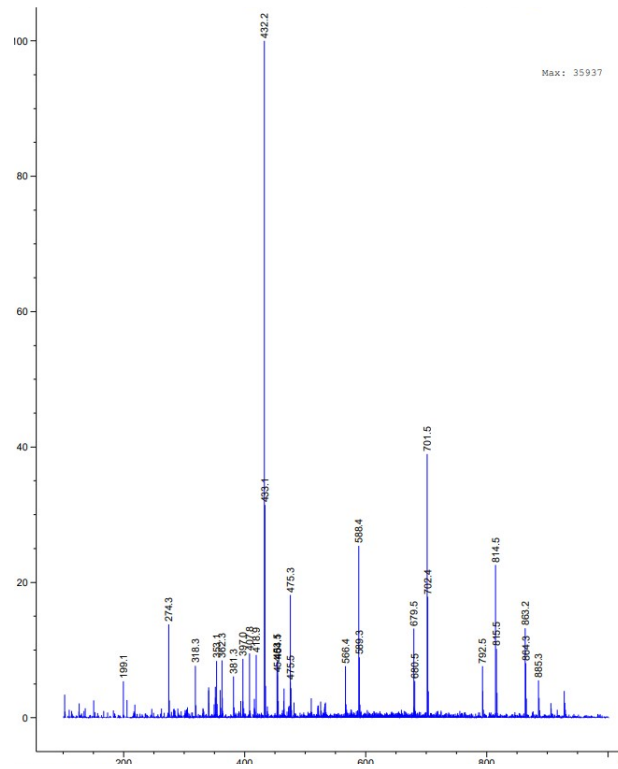

### LC-MS spectra of A09

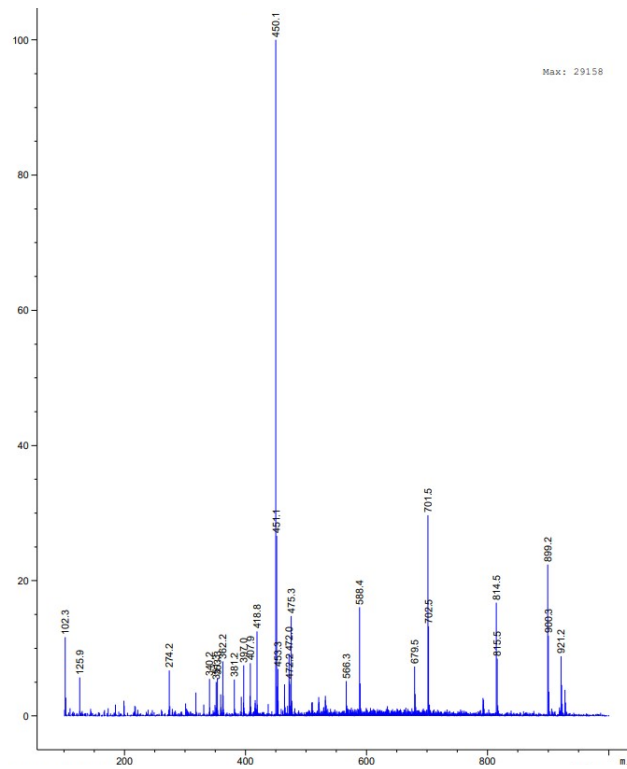

### LC-MS spectra of A10

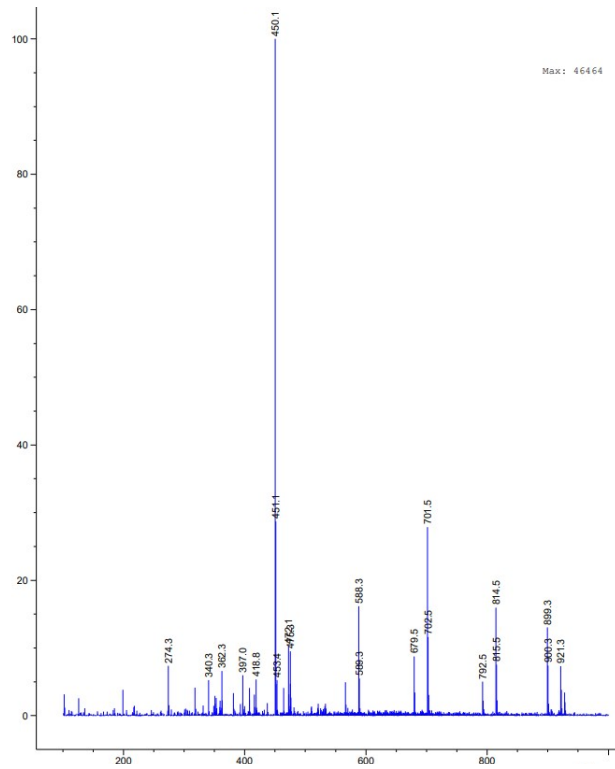

### LC-MS spectra of A12

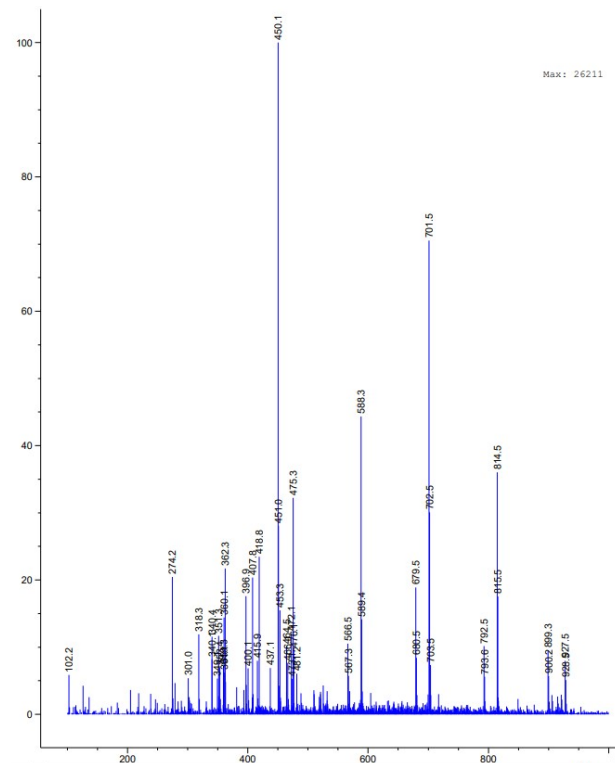

### LC-MS spectra of A13

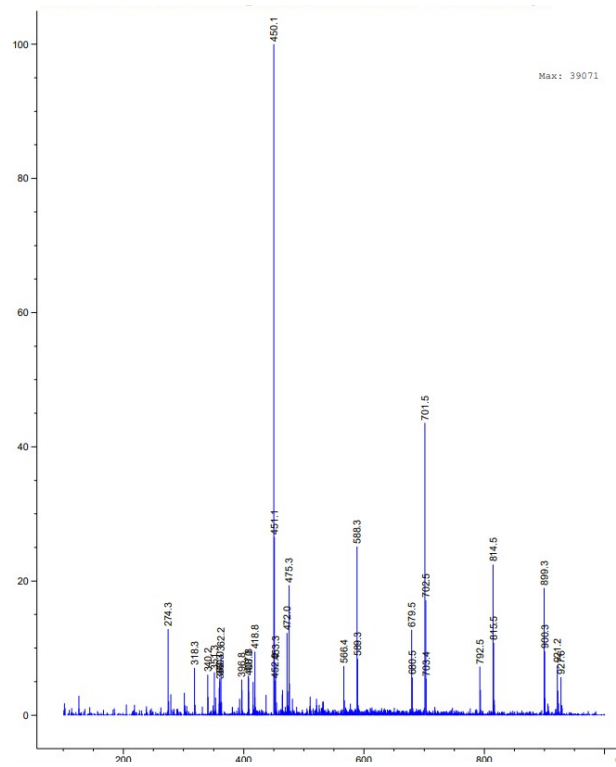

### LC-MS spectra of A14

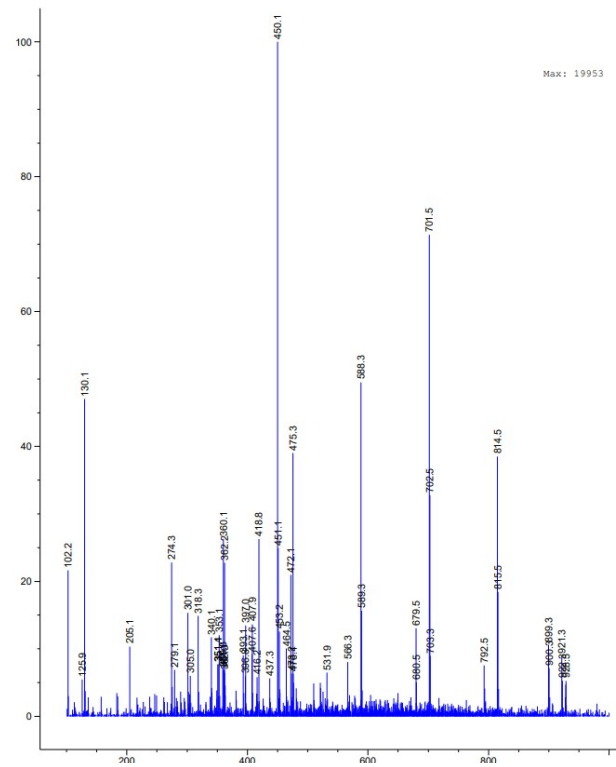

### LC-MS spectra of A15

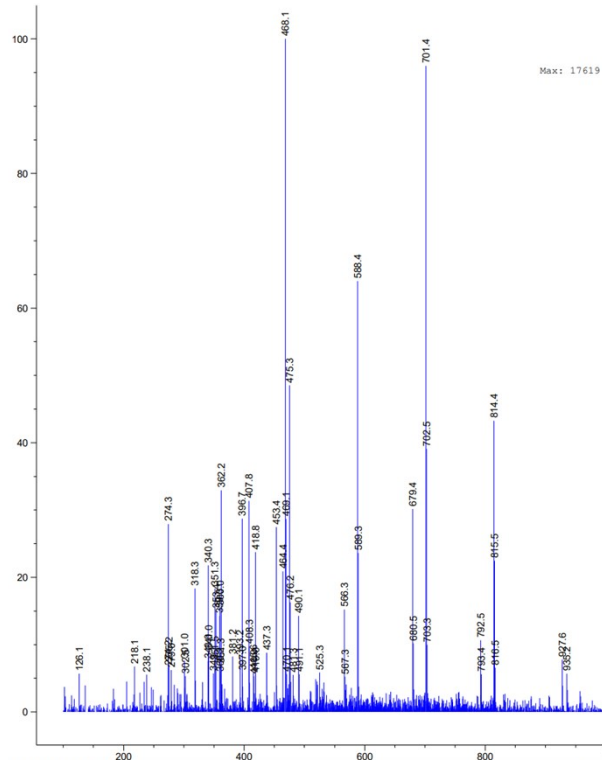

### LC-MS spectra of B02

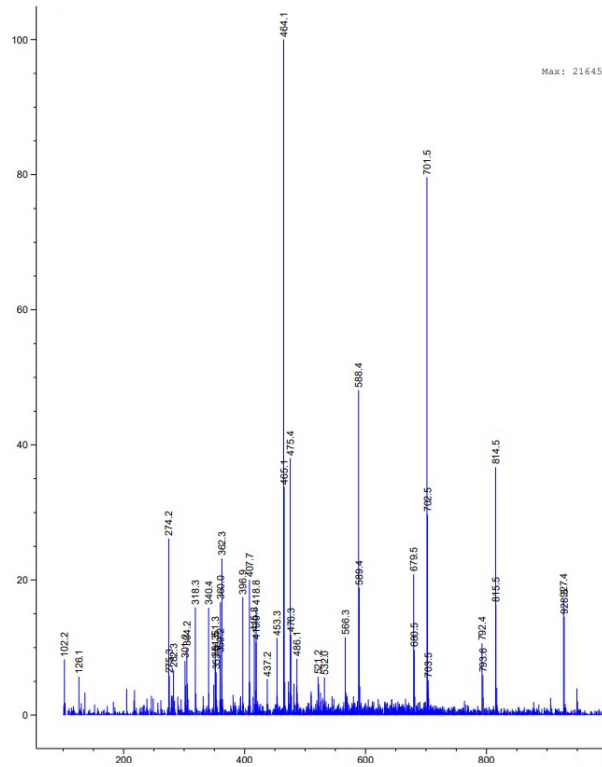

### LC-MS spectra of B03

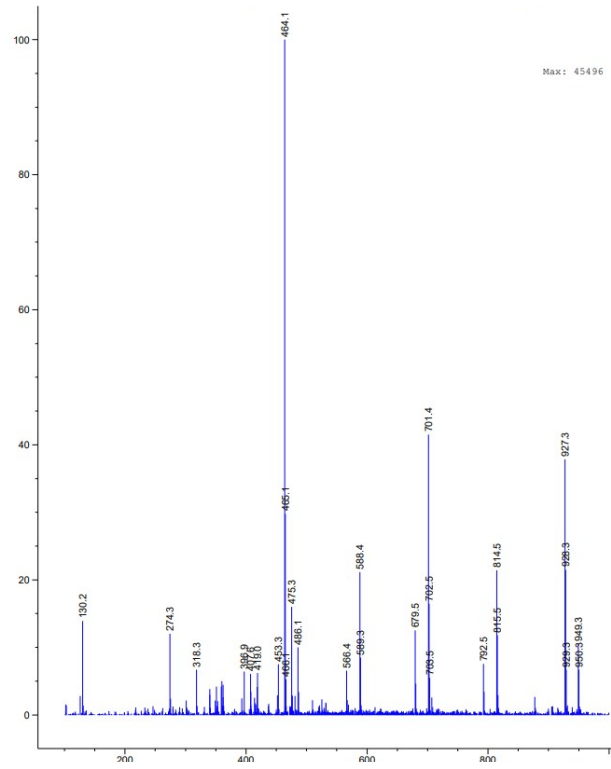

### LC-MS spectra of B05

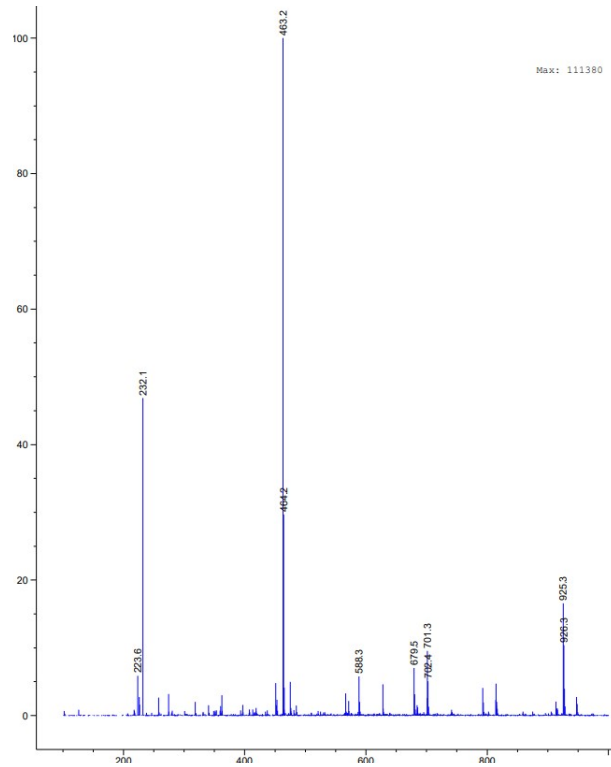

### LC-MS spectra of B06

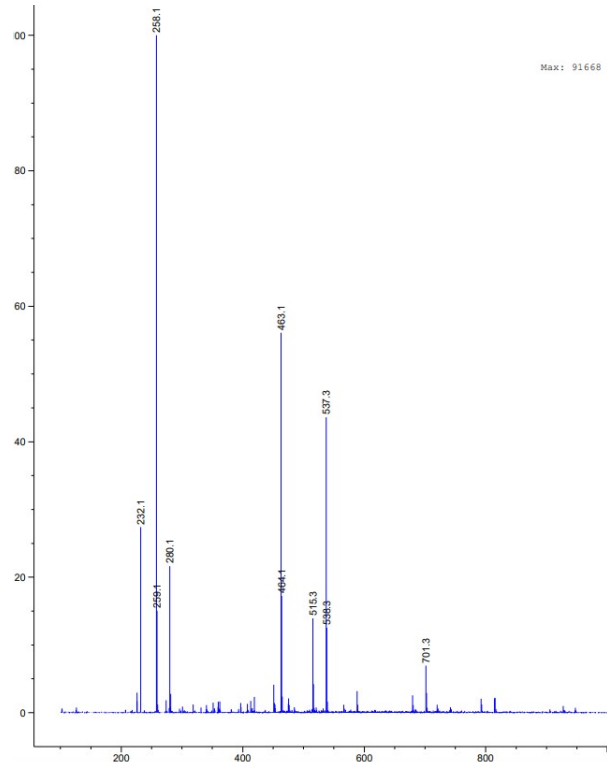

### LC-MS spectra of B07

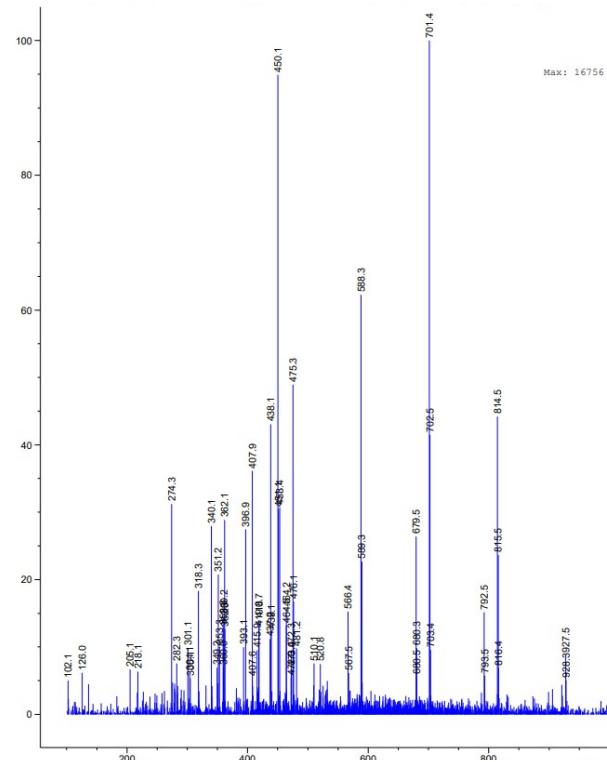



### LC-MS spectra of B08

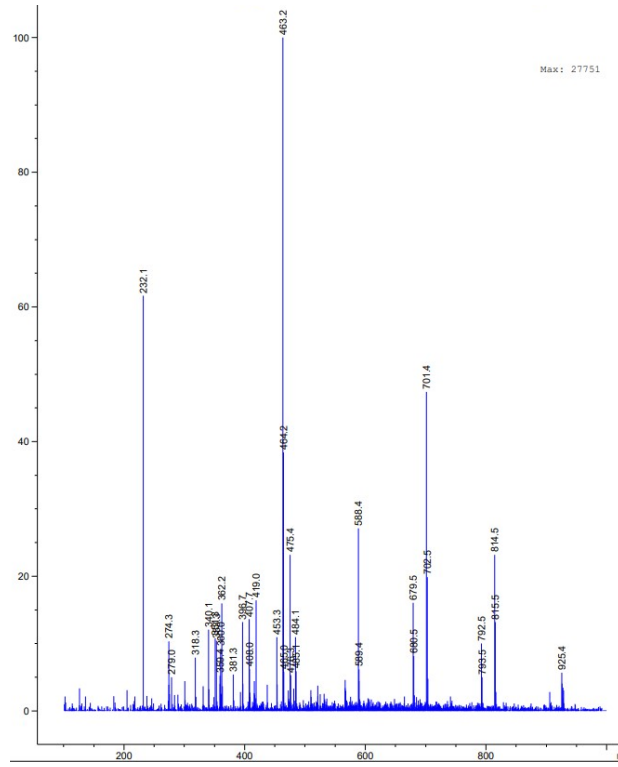

### LC-MS spectra of B11

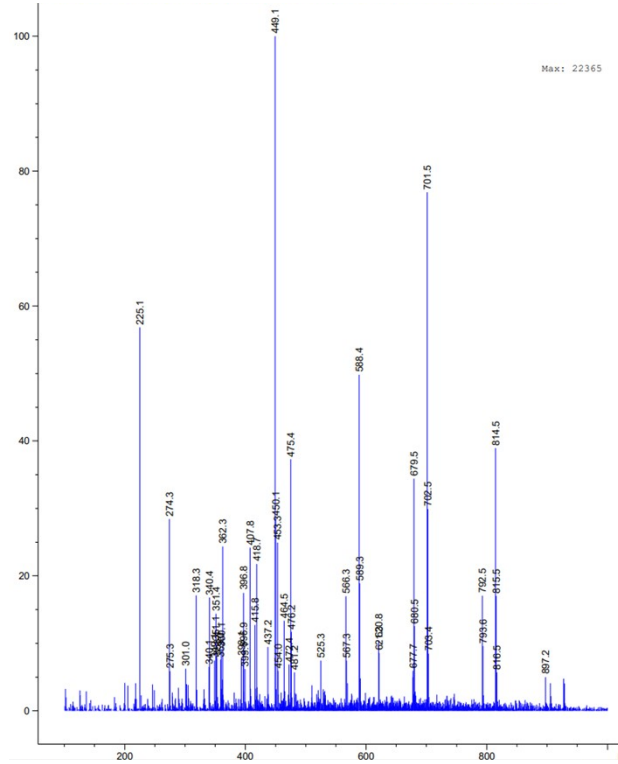

### LC-MS spectra of B12

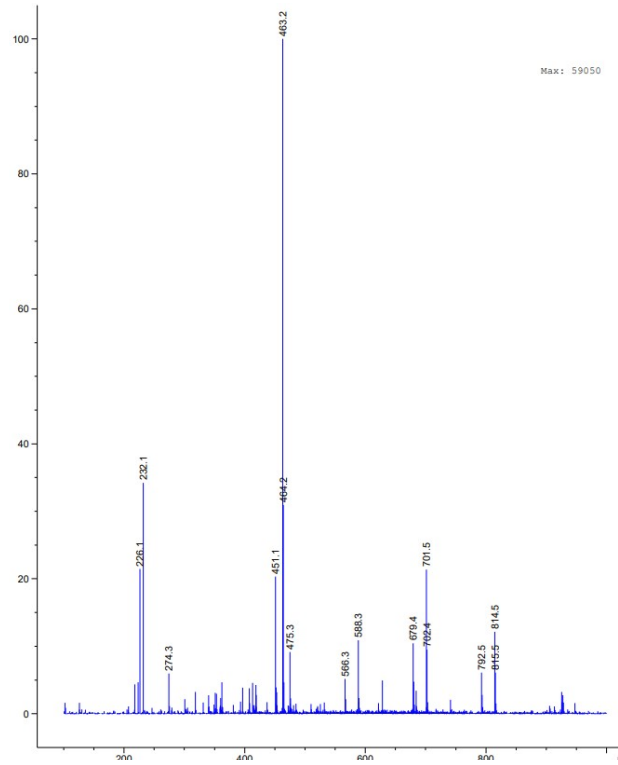

### LC-MS spectra of B13

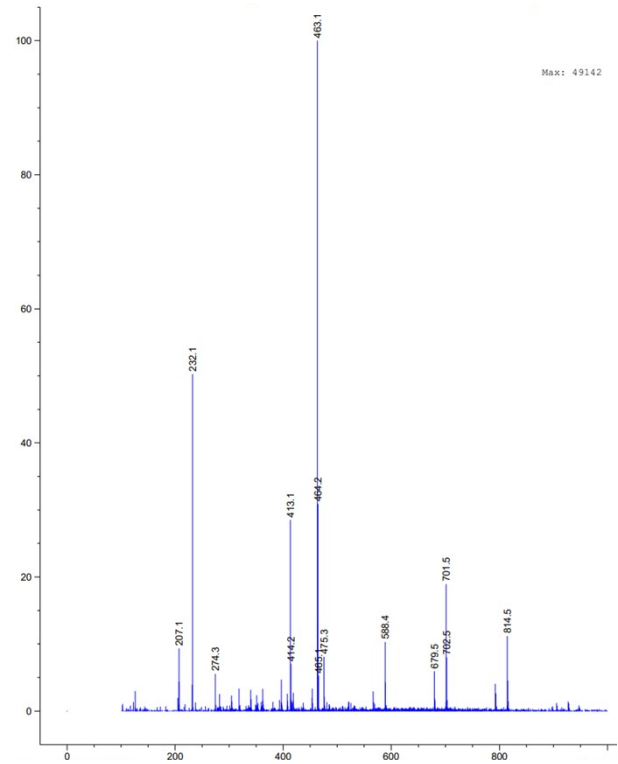

### LC-MS spectra of C01

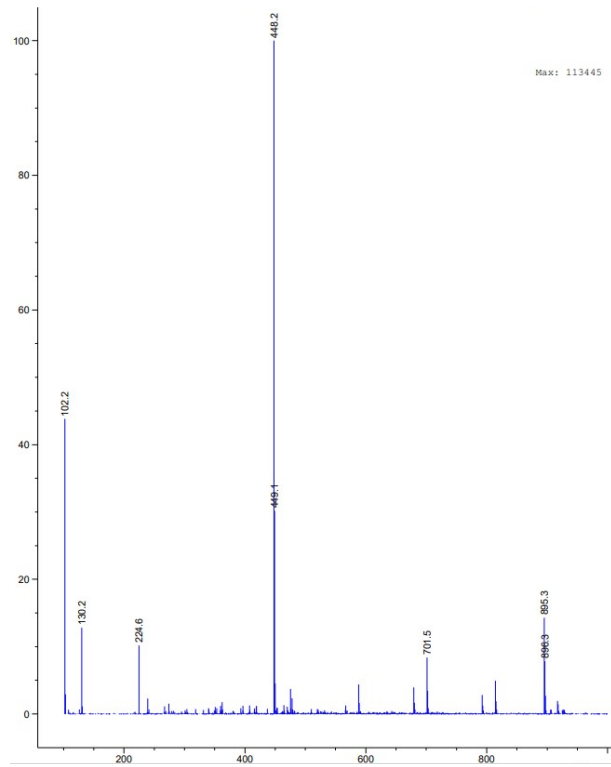

### LC-MS spectra of C02

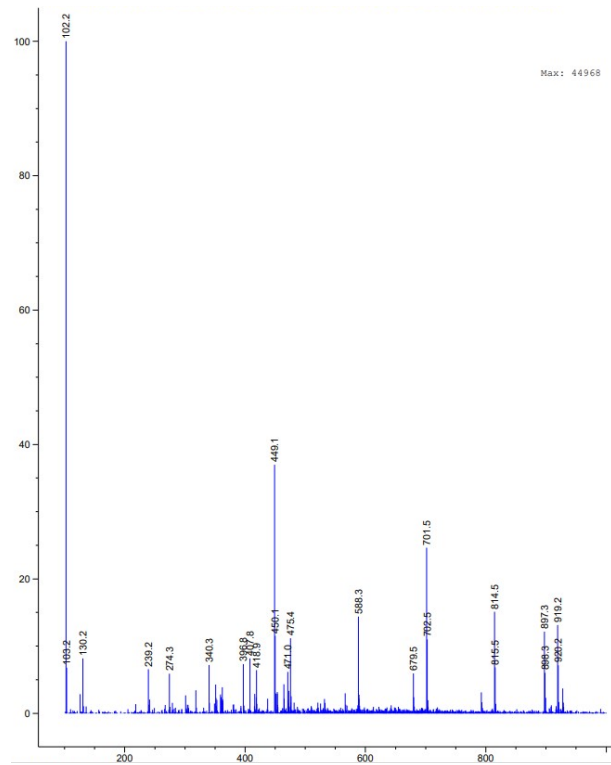

### LC-MS spectra of C04

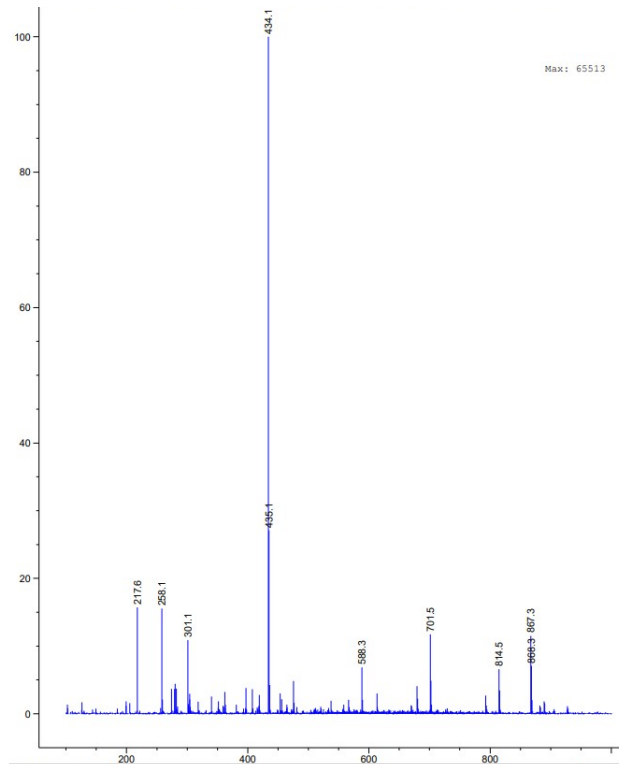

### LC-MS spectra of C05

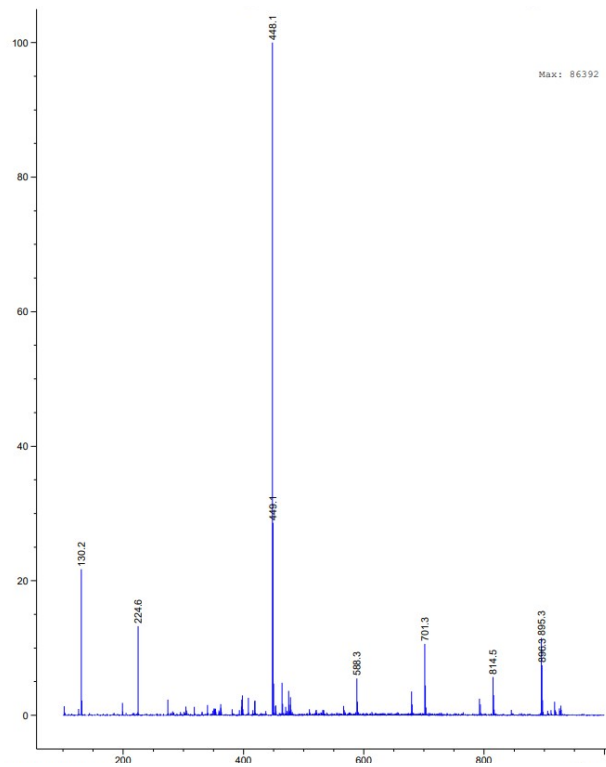

### LC-MS spectra of C06

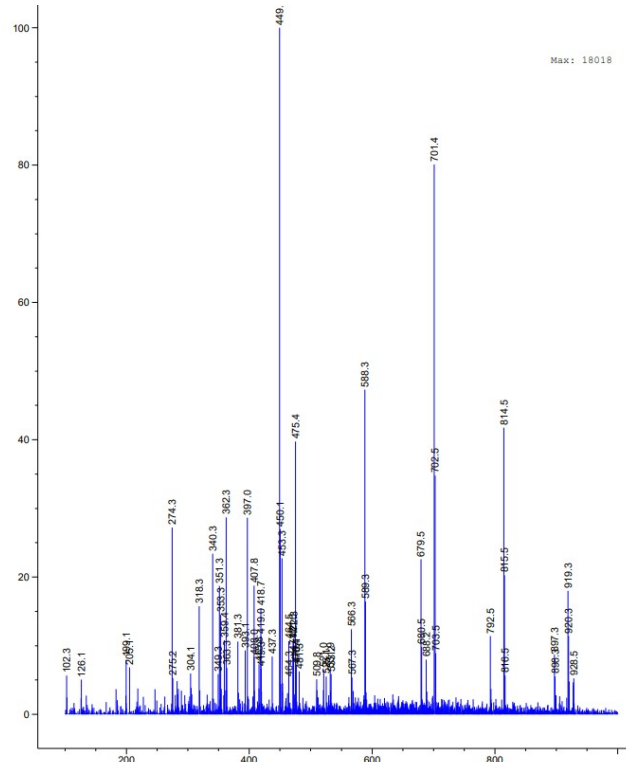

### LC-MS spectra of C07

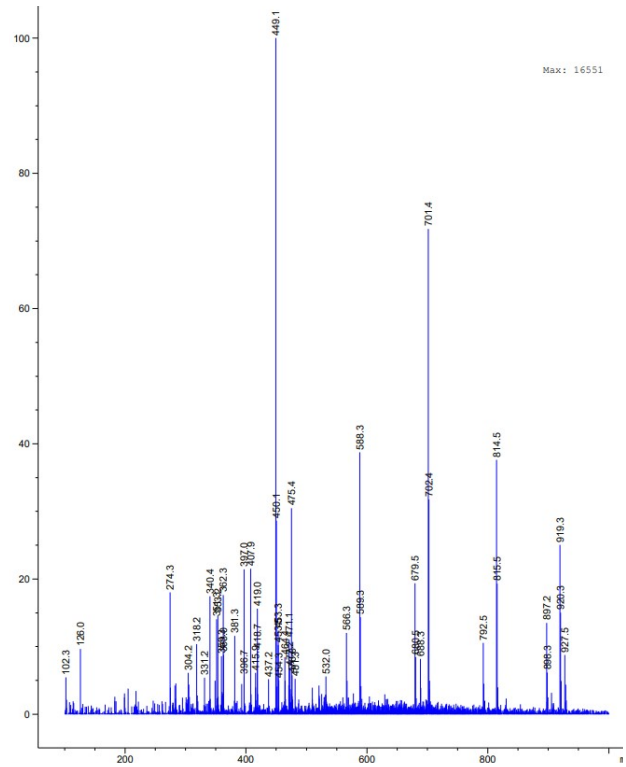

### HRMS spectra of A01

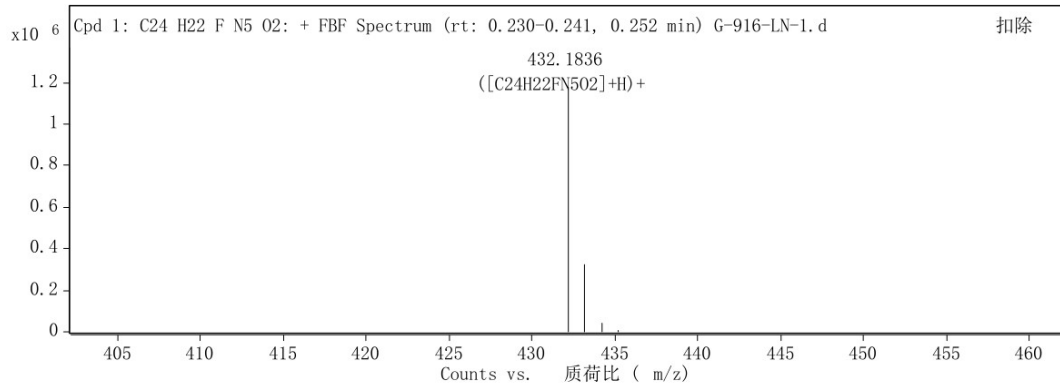

### HRMS spectra of A11

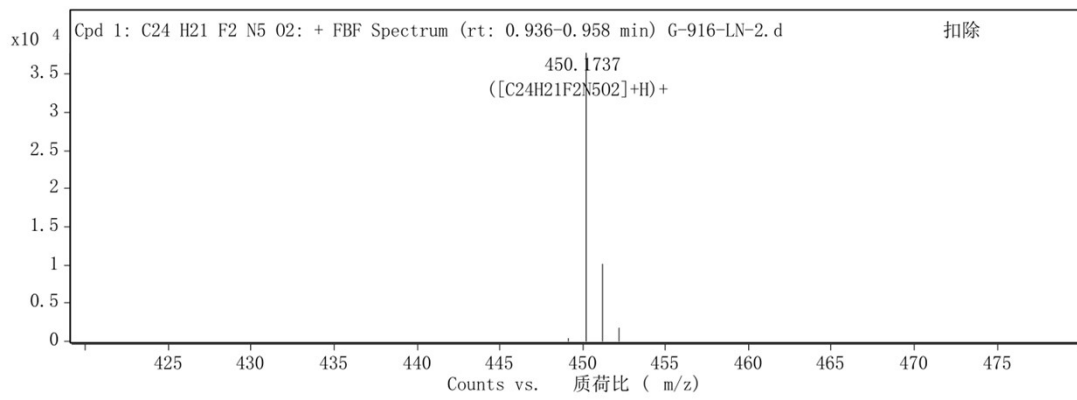

### HRMS spectra of B01

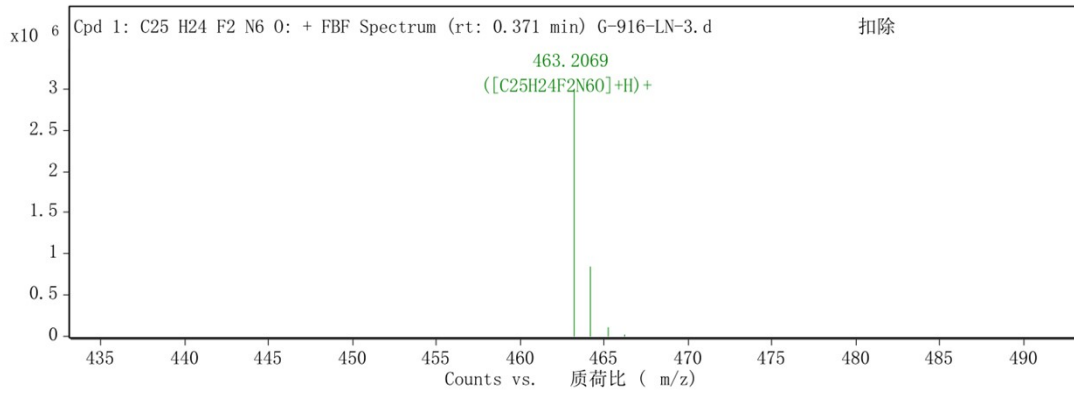

### HRMS spectra of B04

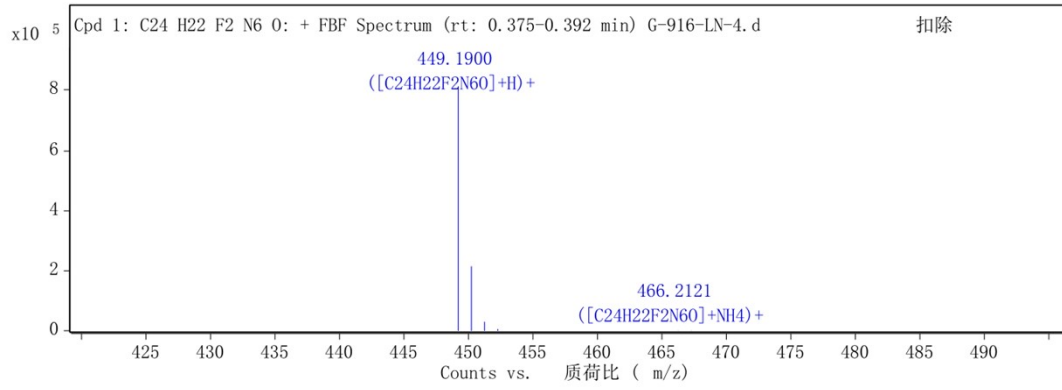

### HRMS spectra of B09

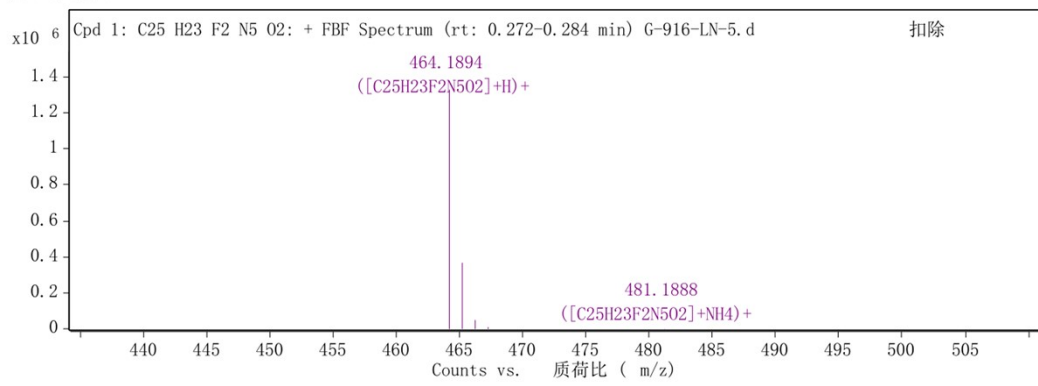

### HRMS spectra of B10

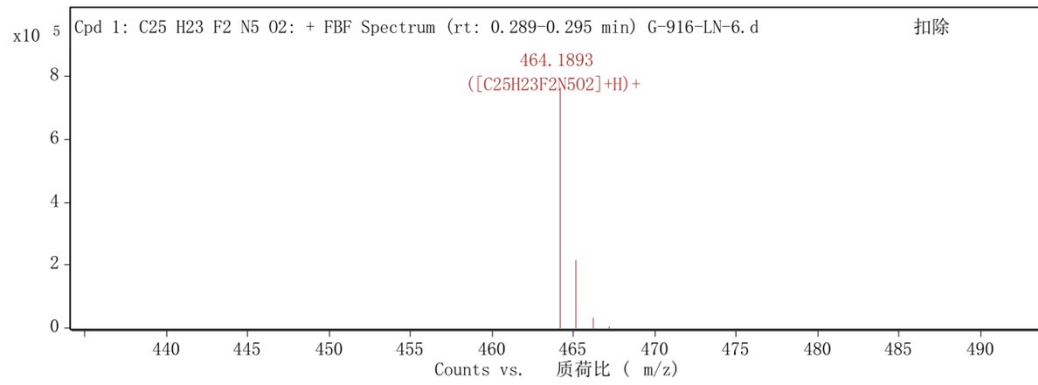

### HRMS spectra of C03

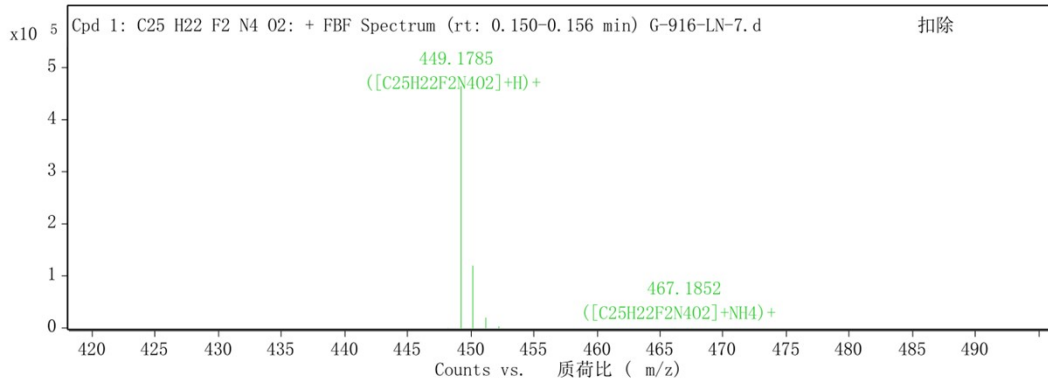

### HRMS spectra of C08

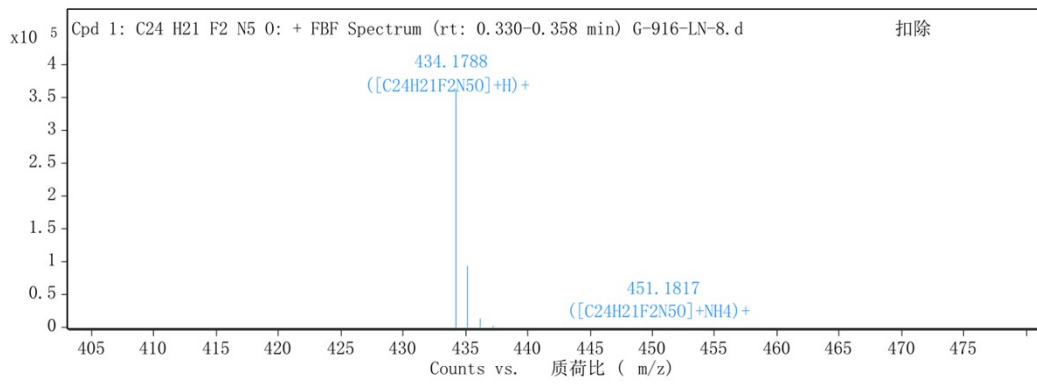

### HRMS spectra of C09

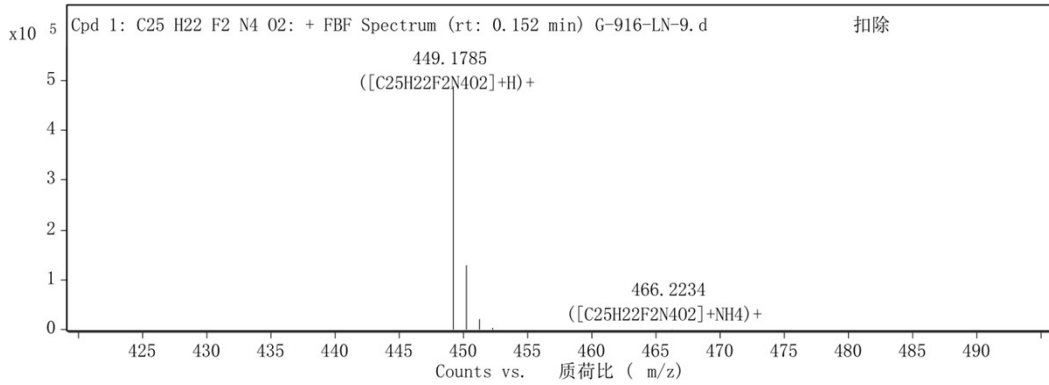

### HRMS spectra of C10

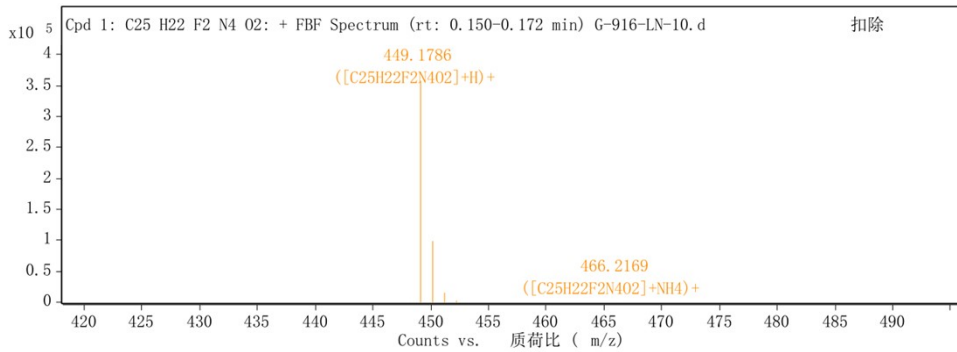



### HPLC spectra of A01

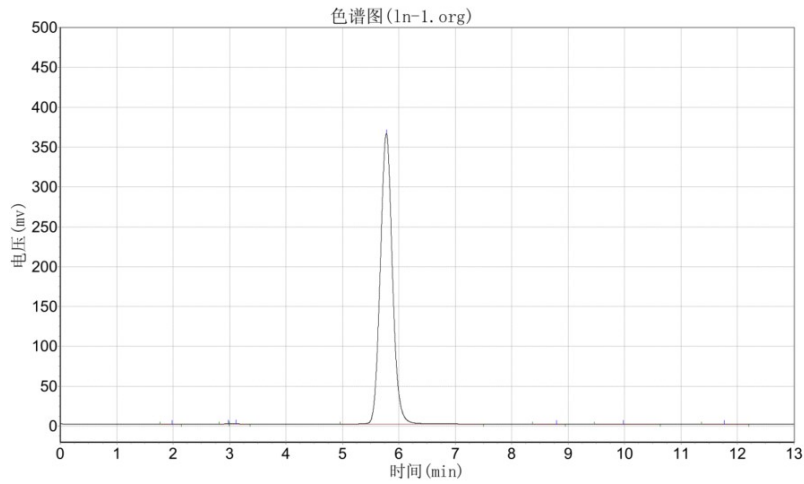

分析结果表

| 峰号 | 峰名 | 保留时间   | 峰高         | 峰面积         | 含量       |
|----|----|--------|------------|-------------|----------|
| 1  |    | 1.982  | 136.087    | 1313.100    | 0.0241   |
| 2  |    | 2.973  | 374.121    | 2714.667    | 0.0497   |
| 3  |    | 3.115  | 632.545    | 5675.734    | 0.1040   |
| 4  |    | 5.782  | 364457.156 | 5435442.500 | 99.6057  |
| 5  |    | 8.798  | 135.853    | 4150.277    | 0.0761   |
| 6  |    | 9.982  | 189.721    | 7190.385    | 0.1318   |
| 7  |    | 11.765 | 19.040     | 474.600     | 0.0087   |
| 总计 |    |        | 365944.523 | 5456961.263 | 100.0000 |

### HPLC spectra of A11

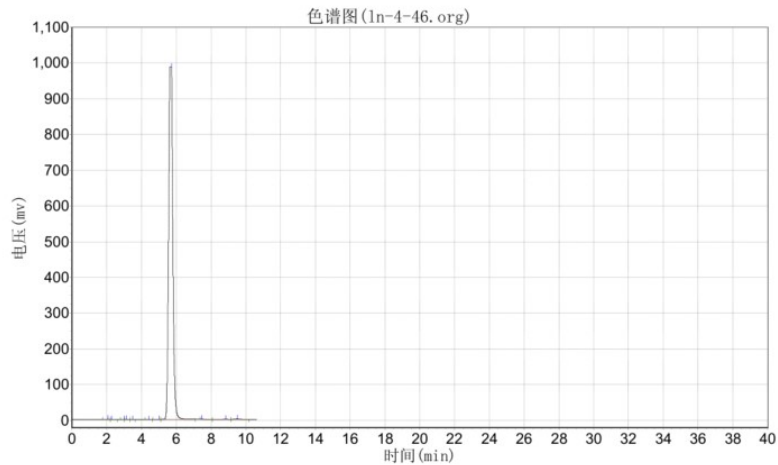

分析结果表

| 峰号 | 峰名 | 保留时间  | 峰高         | 峰面积          | 含量       |
|----|----|-------|------------|--------------|----------|
| 1  |    | 2.073 | 807.110    | 8361.371     | 0.0501   |
| 2  |    | 2.282 | 335.860    | 3480.631     | 0.0209   |
| 3  |    | 2.998 | 383.758    | 2896.649     | 0.0174   |
| 4  |    | 3.132 | 606.242    | 5100.752     | 0.0306   |
| 5  |    | 3.498 | 71.053     | 632.200      | 0.0038   |
| 6  |    | 4.407 | 139.827    | 1604.800     | 0.0096   |
| 7  |    | 5.032 | 129.701    | 1062.234     | 0.0064   |
| 8  |    | 5.715 | 986237.000 | 16588757.000 | 99.4928  |
| 9  |    | 7.482 | 156.167    | 2624.900     | 0.0157   |
| 10 |    | 8.832 | 614.500    | 17304.801    | 0.1038   |
| 11 |    | 9.515 | 1823.250   | 41494.199    | 0.2489   |
| 总计 |    |       | 991304.467 | 16673319.538 | 100.0000 |

### HPLC spectra of A14

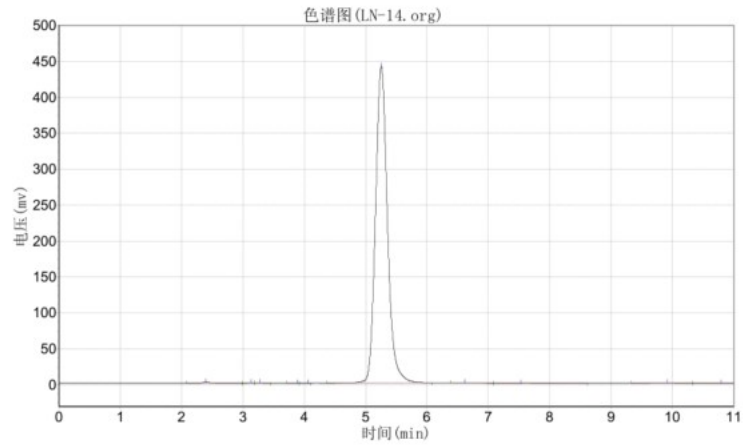

分析结果表

| 峰号 | 峰名 | 保留时间   | 峰高         | 峰面积         | 含量       |
|----|----|--------|------------|-------------|----------|
| 1  |    | 2.398  | 1676.873   | 19713.301   | 0.3280   |
| 2  |    | 3.132  | 596.073    | 4702.146    | 0.0782   |
| 3  |    | 3.273  | 671.145    | 5509.754    | 0.0917   |
| 4  |    | 3.882  | 22.167     | 169.400     | 0.0028   |
| 5  |    | 4.065  | 43.913     | 286.650     | 0.0048   |
| 6  |    | 5.257  | 440323.500 | 5948345.500 | 98.9748  |
| 7  |    | 6.615  | 357.333    | 6245.800    | 0.1039   |
| 8  |    | 7.532  | 172.337    | 9160.700    | 0.1524   |
| 9  |    | 9.915  | 396.089    | 10543.617   | 0.1754   |
| 10 |    | 10.798 | 155.452    | 5282.578    | 0.0879   |
| 总计 |    |        | 444414.881 | 6009959.446 | 100.0000 |

### HPLC spectra of A15

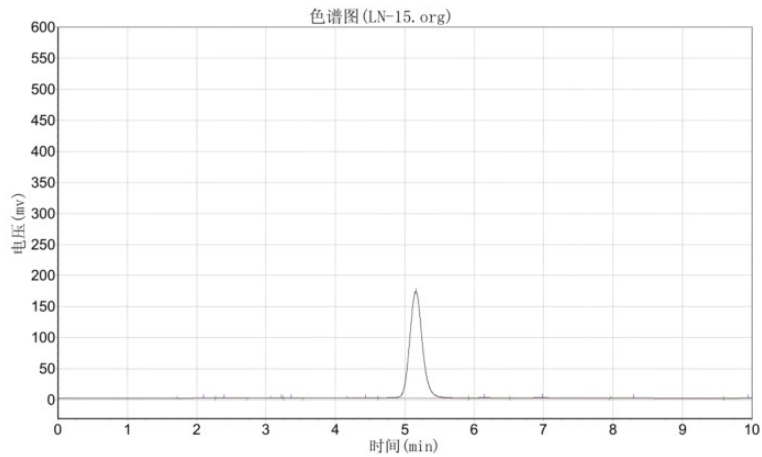

分析结果表

| 峰号 | 峰名 | 保留时间  | 峰高         | 峰面积         | 含量       |
|----|----|-------|------------|-------------|----------|
| 1  |    | 2.098 | 249.049    | 2796.230    | 0.1217   |
| 2  |    | 2.398 | 173.131    | 2187.781    | 0.0952   |
| 3  |    | 3.223 | 389.000    | 2484.979    | 0.1082   |
| 4  |    | 3.357 | 553.895    | 4772.121    | 0.2077   |
| 5  |    | 4.432 | 398.166    | 6277.093    | 0.2732   |
| 6  |    | 5.165 | 171241.875 | 2191958.000 | 95.4105  |
| 7  |    | 6.148 | 1061.794   | 22830.611   | 0.9938   |
| 8  |    | 6.982 | 1078.187   | 39985.320   | 1.7405   |
| 9  |    | 8.298 | 682.068    | 19862.707   | 0.8646   |
| 10 |    | 9.948 | 278.469    | 4243.100    | 0.1847   |
| 总计 |    |       | 176105.634 | 2297397.942 | 100.0000 |

### HPLC spectra of B01

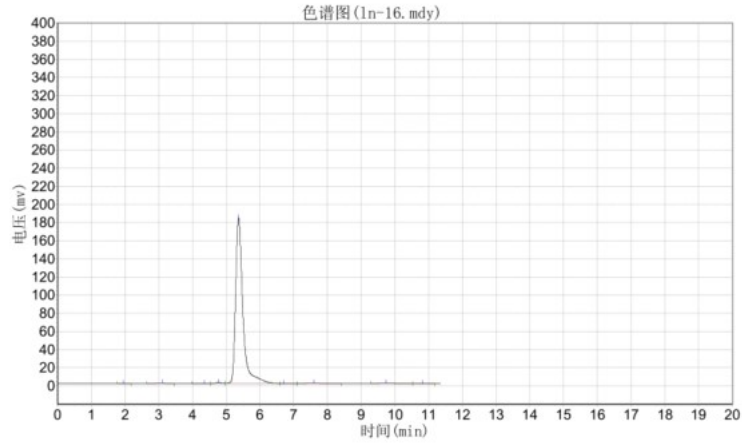

分析结果表

| 峰号 | 峰名 | 保留时间   | 峰高         | 峰面积         | 含量       |
|----|----|--------|------------|-------------|----------|
| 1  |    | 1.940  | 137.417    | 1204.300    | 0.0429   |
| 2  |    | 3.115  | 594.735    | 7961.400    | 0.2838   |
| 3  |    | 4.340  | 127.180    | 1846.251    | 0.0658   |
| 4  |    | 4.765  | 1124.278   | 14753.274   | 0.5259   |
| 5  |    | 5.365  | 181548.531 | 2751846.500 | 98.0866  |
| 6  |    | 6.698  | 135.880    | 3401.748    | 0.1213   |
| 7  |    | 7.598  | 491.263    | 12747.550   | 0.4544   |
| 8  |    | 9.732  | 359.068    | 10812.500   | 0.3854   |
| 9  |    | 10.815 | 51.250     | 954.600     | 0.0340   |
| 总计 |    |        | 184569.602 | 2805528.123 | 100.0000 |

### HPLC spectra of B04

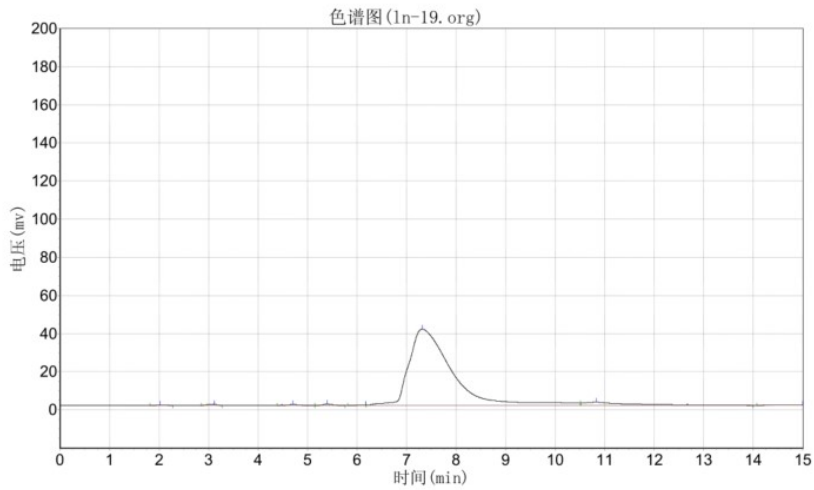

分析结果表

| 峰号 | 峰名 | 保留时间   | 峰高        | 峰面积         | 含量       |
|----|----|--------|-----------|-------------|----------|
| 1  |    | 2.015  | 304.286   | 2795.700    | 0.1116   |
| 2  |    | 3.115  | 578.846   | 6935.700    | 0.2768   |
| 3  |    | 4.707  | 483.637   | 6812.550    | 0.2719   |
| 4  |    | 5.398  | 660.167   | 8795.000    | 0.3510   |
| 5  |    | 6.165  | 149.305   | 1645.950    | 0.0657   |
| 6  |    | 7.315  | 39909.453 | 2367397.500 | 94.4840  |
| 7  |    | 10.832 | 1613.379  | 101968.641  | 4.0696   |
| 8  |    | 14.998 | 177.434   | 9255.900    | 0.3694   |
| 总计 |    |        | 43876.507 | 2505606.941 | 100.0000 |

### HPLC spectra of B09

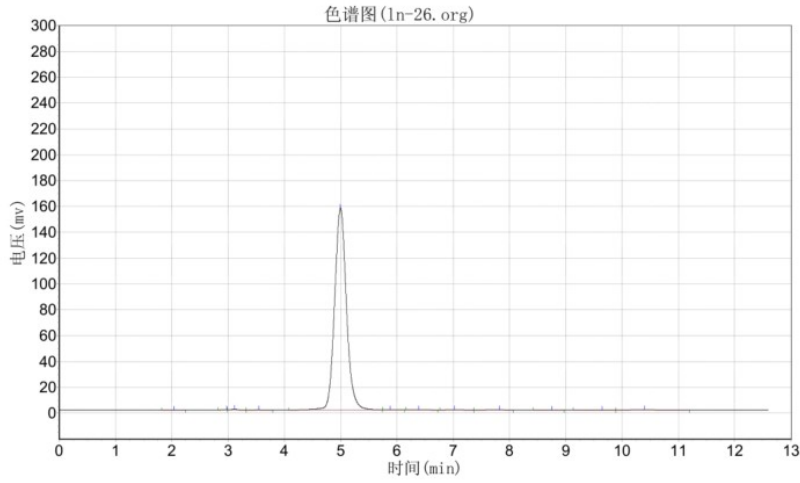

分析结果表

| 峰号 | 峰名 | 保留时间   | 峰高         | 峰面积         | 含量       |
|----|----|--------|------------|-------------|----------|
| 1  |    | 2.040  | 136.333    | 1421.900    | 0.0614   |
| 2  |    | 2.973  | 360.500    | 2411.666    | 0.1042   |
| 3  |    | 3.115  | 627.083    | 5701.933    | 0.2464   |
| 4  |    | 3.540  | 114.250    | 1416.700    | 0.0612   |
| 5  |    | 4.998  | 156140.359 | 2281262.250 | 98.5710  |
| 6  |    | 5.882  | 253.278    | 4484.965    | 0.1938   |
| 7  |    | 6.382  | 265.443    | 4446.975    | 0.1921   |
| 8  |    | 7.015  | 103.785    | 1760.647    | 0.0761   |
| 9  |    | 7.815  | 101.857    | 1979.200    | 0.0855   |
| 10 |    | 8.748  | 72.606     | 1988.700    | 0.0859   |
| 11 |    | 9.648  | 69.750     | 1787.281    | 0.0772   |
| 12 |    | 10.398 | 167.323    | 5672.914    | 0.2451   |
| 总计 |    |        | 158412.568 | 2314335.132 | 100.0000 |

### HPLC spectra of B10

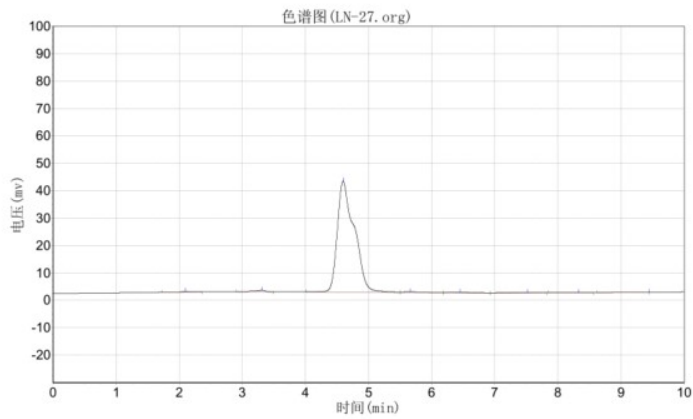

分析结果表

| 峰号 | 峰名 | 保留时间  | 峰高        | 峰面积        | 含量       |
|----|----|-------|-----------|------------|----------|
| 1  |    | 2.098 | 280.118   | 2461.500   | 0.3120   |
| 2  |    | 3.307 | 580.657   | 7465.300   | 0.9463   |
| 3  |    | 4.598 | 40553.531 | 760400.250 | 96.3845  |
| 4  |    | 5.665 | 316.316   | 6821.784   | 0.8647   |
| 5  |    | 6.448 | 242.581   | 7130.052   | 0.9038   |
| 6  |    | 7.515 | 79.000    | 3865.600   | 0.4900   |
| 7  |    | 8.332 | 30.558    | 535.800    | 0.0679   |
| 8  |    | 9.448 | 0.000     | 243.500    | 0.0309   |
| 总计 |    |       | 42082.762 | 788923.786 | 100.0000 |

### HPLC spectra of B12

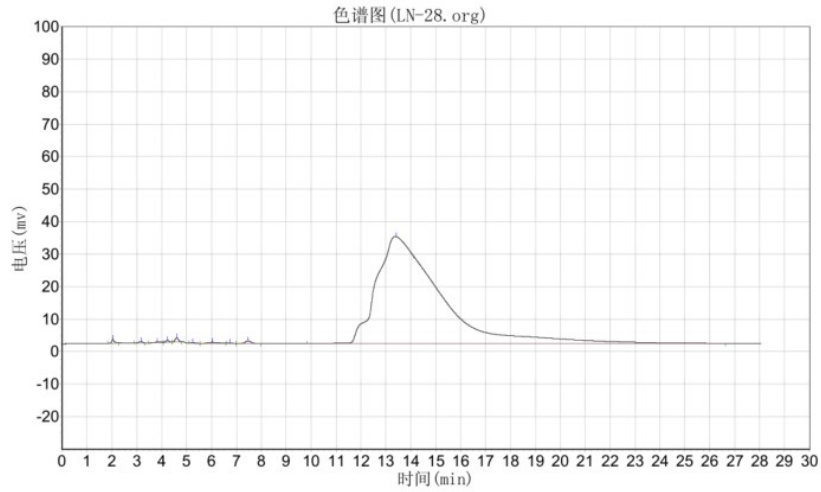

分析结果表

| 峰号 | 峰名 | 保留时间   | 峰高        | 峰面积         | 含量       |
|----|----|--------|-----------|-------------|----------|
| 1  |    | 2.040  | 1203.558  | 8578.000    | 0.1464   |
| 2  |    | 3.190  | 459.815   | 4830.900    | 0.0824   |
| 3  |    | 3.823  | 172.552   | 4021.620    | 0.0686   |
| 4  |    | 4.232  | 633.621   | 6471.182    | 0.1104   |
| 5  |    | 4.607  | 1308.500  | 12378.300   | 0.2112   |
| 6  |    | 5.248  | 215.357   | 3126.300    | 0.0533   |
| 7  |    | 6.048  | 380.349   | 12937.981   | 0.2208   |
| 8  |    | 6.732  | 161.326   | 2118.476    | 0.0361   |
| 9  |    | 7.465  | 805.814   | 12592.600   | 0.2149   |
| 10 |    | 13.398 | 32911.402 | 5793621.500 | 98.8558  |
| 总计 |    |        | 38252.292 | 5860676.858 | 100.0000 |

### HPLC spectra of B13

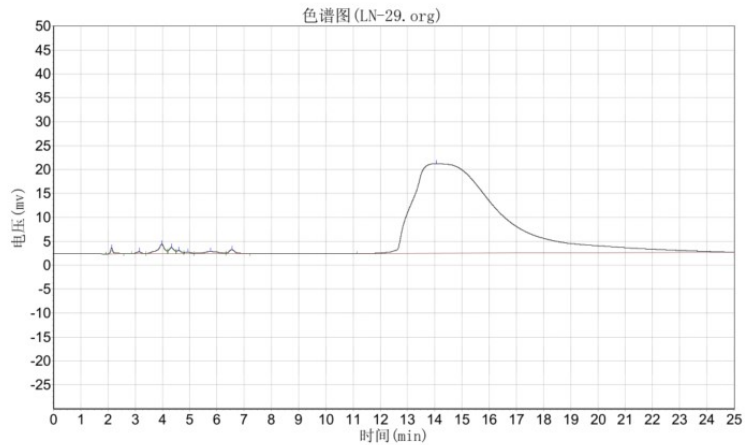

分析结果表

| 峰号 | 峰名 | 保留时间   | 峰高        | 峰面积         | 含量       |
|----|----|--------|-----------|-------------|----------|
| 1  |    | 2.132  | 1238.709  | 9109.450    | 0.2127   |
| 2  |    | 3.148  | 457.258   | 4762.700    | 0.1112   |
| 3  |    | 3.973  | 1967.302  | 34531.406   | 0.8063   |
| 4  |    | 4.332  | 1281.274  | 16869.643   | 0.3939   |
| 5  |    | 4.598  | 655.509   | 7408.124    | 0.1730   |
| 6  |    | 4.923  | 313.576   | 4807.850    | 0.1123   |
| 7  |    | 5.765  | 482.161   | 16605.604   | 0.3877   |
| 8  |    | 6.548  | 828.913   | 12079.869   | 0.2821   |
| 9  |    | 14.065 | 18776.463 | 4176613.500 | 97.5209  |
| 总计 |    |        | 26001.164 | 4282788.146 | 100.0000 |

## HPLC spectra of C03

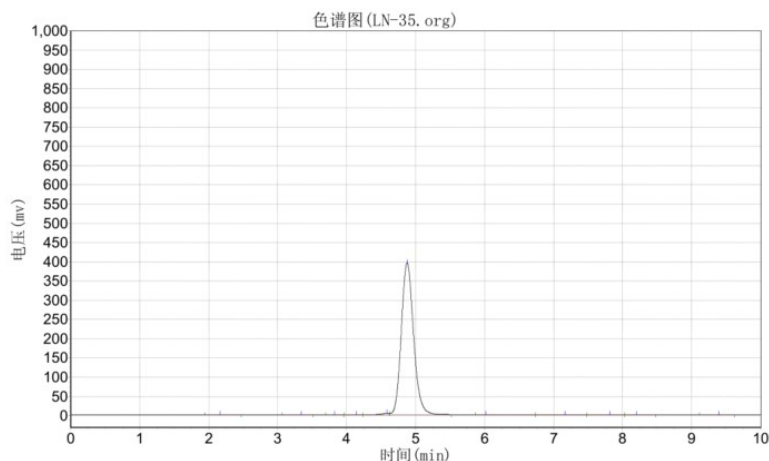

分析结果表

| 峰号 | 峰名 | 保留时间   | 峰高         | 峰面积         | 含量       |
|----|----|--------|------------|-------------|----------|
| 1  |    | 2.165  | 589.984    | 5453.400    | 0.1106   |
| 2  |    | 3.340  | 537.389    | 6675.600    | 0.1353   |
| 3  |    | 3.823  | 58.871     | 475.600     | 0.0096   |
| 4  |    | 4.140  | 48.452     | 481.606     | 0.0098   |
| 5  |    | 4.582  | 3148.591   | 25386.006   | 0.5147   |
| 6  |    | 4.882  | 394368.375 | 4867269.500 | 98.6742  |
| 7  |    | 6.015  | 96.577     | 4766.800    | 0.0966   |
| 8  |    | 7.165  | 105.048    | 3653.240    | 0.0741   |
| 9  |    | 7.815  | 177.619    | 3760.626    | 0.0762   |
| 10 |    | 8.198  | 114.238    | 1849.428    | 0.0375   |
| 11 |    | 9.398  | 62.433     | 827.900     | 0.0168   |
| 12 |    | 10.565 | 597.000    | 12066.600   | 0.2446   |
| 总计 |    |        | 399904.577 | 4932666.306 | 100.0000 |

## HPLC spectra of C04

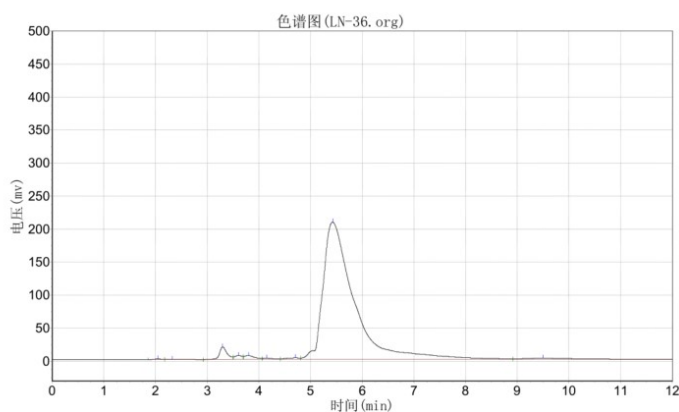

分析结果表

| 峰号 | 峰名 | 保留时间   | 峰高         | 峰面积         | 含量       |
|----|----|--------|------------|-------------|----------|
| 1  |    | 2.040  | 1102.000   | 6372.500    | 0.0692   |
| 2  |    | 2.323  | 127.944    | 116.400     | 0.0013   |
| 3  |    | 3.298  | 19031.867  | 194359.172  | 2.1092   |
| 4  |    | 3.607  | 6092.179   | 61724.816   | 0.6698   |
| 5  |    | 3.798  | 5992.022   | 85812.719   | 0.9312   |
| 6  |    | 4.148  | 2034.431   | 30748.891   | 0.3337   |
| 7  |    | 4.707  | 2521.321   | 46376.102   | 0.5033   |
| 8  |    | 5.432  | 208091.594 | 8637461.000 | 93.7343  |
| 9  |    | 9.498  | 2004.392   | 151464.250  | 1.6437   |
| 10 |    | 12.665 | 24.905     | 399.100     | 0.0043   |
| 总计 |    |        | 247022.654 | 9214834.949 | 100.0000 |

## HPLC spectra of C06

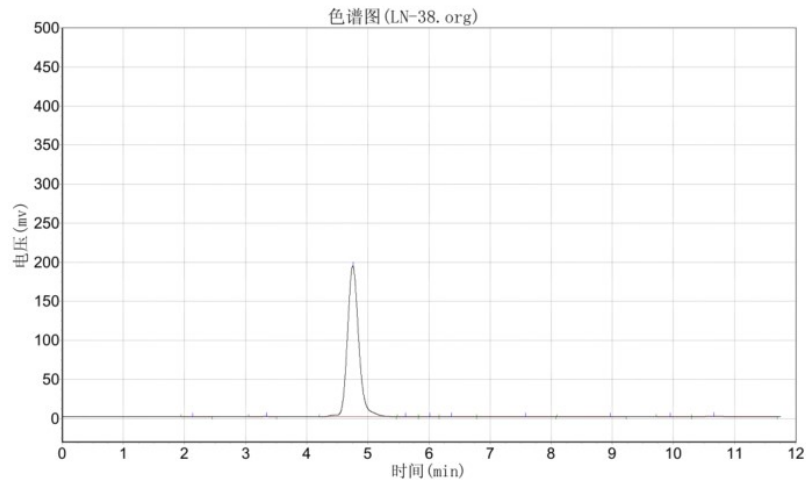

分析结果表

| 峰号 | 峰名 | 保留时间   | 峰高         | 峰面积         | 含量       |
|----|----|--------|------------|-------------|----------|
| 1  |    | 2.132  | 281.403    | 2788.300    | 0.1097   |
| 2  |    | 3.340  | 543.000    | 6882.450    | 0.2707   |
| 3  |    | 4.757  | 193175.984 | 2485239.750 | 97.7620  |
| 4  |    | 5.615  | 416.990    | 6424.555    | 0.2527   |
| 5  |    | 6.015  | 261.165    | 4700.155    | 0.1849   |
| 6  |    | 6.365  | 431.068    | 8598.041    | 0.3382   |
| 7  |    | 7.582  | 116.462    | 6561.300    | 0.2581   |
| 8  |    | 8.965  | 93.352     | 3754.062    | 0.1477   |
| 9  |    | 9.948  | 126.347    | 3471.117    | 0.1365   |
| 10 |    | 10.665 | 576.157    | 13714.169   | 0.5395   |
| 总计 |    |        | 196021.929 | 2542133.899 | 100.0000 |

## HPLC spectra of C09

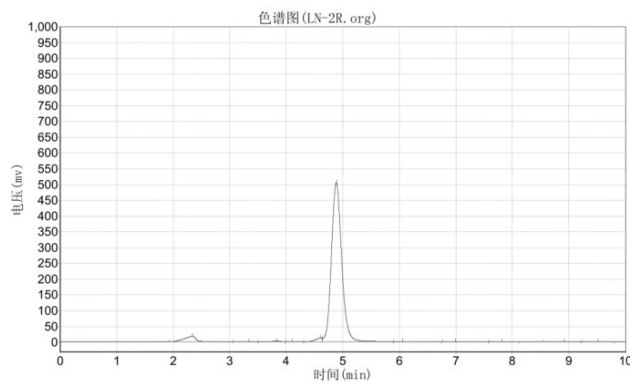

分析结果表

| 峰号 | 峰名 | 保留时间   | 峰高         | 峰面积         | 含量       |
|----|----|--------|------------|-------------|----------|
| 1  |    | 2.340  | 17379.156  | 245322.703  | 3.6479   |
| 2  |    | 3.340  | 524.615    | 6622.700    | 0.0985   |
| 3  |    | 3.832  | 1445.513   | 14927.480   | 0.2220   |
| 4  |    | 4.107  | 687.536    | 8581.699    | 0.1276   |
| 5  |    | 4.607  | 10679.305  | 92501.703   | 1.3755   |
| 6  |    | 4.890  | 503338.531 | 6320089.500 | 93.9784  |
| 7  |    | 6.065  | 505.549    | 16517.752   | 0.2456   |
| 8  |    | 6.998  | 101.741    | 3588.817    | 0.0534   |
| 9  |    | 7.815  | 104.333    | 1986.480    | 0.0295   |
| 10 |    | 8.915  | 39.250     | 754.700     | 0.0112   |
| 11 |    | 9.515  | 61.000     | 895.700     | 0.0133   |
| 12 |    | 10.715 | 567.113    | 11539.700   | 0.1716   |
| 13 |    | 12.082 | 101.590    | 1719.300    | 0.0256   |
| 总计 |    |        | 535535.232 | 6725048.236 | 100.0000 |

## HPLC spectra of C10

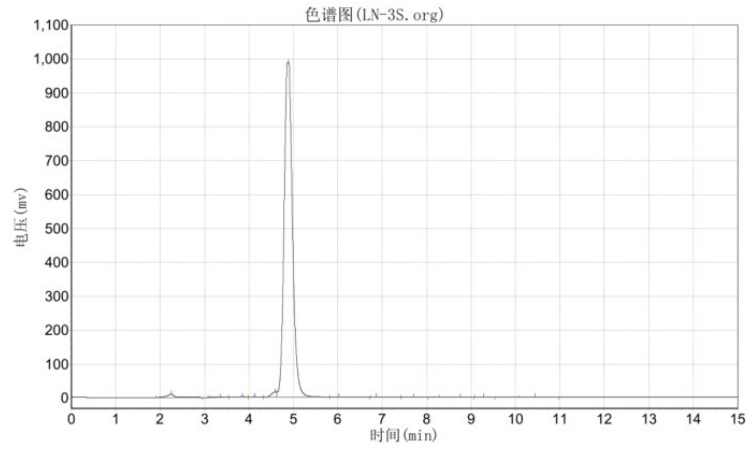

分析结果表

| 峰号 | 峰名 | 保留时间   | 峰高          | 峰面积          | 含量       |
|----|----|--------|-------------|--------------|----------|
| 1  |    | 2.248  | 9778.341    | 96767.203    | 0.7367   |
| 2  |    | 3.357  | 501.571     | 6291.600     | 0.0479   |
| 3  |    | 3.848  | 1709.117    | 17271.279    | 0.1315   |
| 4  |    | 4.123  | 1365.545    | 16865.533    | 0.1284   |
| 5  |    | 4.590  | 15079.182   | 126360.711   | 0.9620   |
| 6  |    | 4.890  | 986478.375  | 12821212.000 | 97.6100  |
| 7  |    | 6.015  | 914.857     | 27677.355    | 0.2107   |
| 8  |    | 6.865  | 135.909     | 3863.098     | 0.0294   |
| 9  |    | 7.698  | 194.117     | 3416.573     | 0.0260   |
| 10 |    | 8.765  | 132.867     | 2495.665     | 0.0190   |
| 11 |    | 9.282  | 71.000      | 938.199      | 0.0071   |
| 12 |    | 10.448 | 622.057     | 11987.500    | 0.0913   |
| 总计 |    |        | 1016982.938 | 13135146.717 | 100.0000 |
